# Supplementary material for: Analysis of differential expression of hair follicle tissue transcriptome in Hetian sheep undergoing different periodic changes
Source: PeerJ journal article supplement (doi:10.7717/peerj.18542), 2024-11-25
Supplement: lncRNA_expression_anno.zip [file lncRNA_expression_anno.xls]

lncRNA_id	NONCODE_id	lncRNA_source	lncRNA_name	ensembl_name	louse	length	S00617149I_FPKM	S00617149II_FPKM	S00617149III_FPKM	S01180635I_FPKM	S01180635II_FPKM	S01180635III_FPKM	S01180656I_FPKM	S01180656II_FPKM	S01180656III_FPKM	S00617149I_count	S00617149II_count	S00617149III_count	S01180635I_count	S01180635II_count	S01180635III_count	S01180656I_count	S01180656II_count	S01180656III_count
ENSOART00000029049	ENSOART00000029049	ensembl:	-		16:70843439-70846169	1794	0	0.218665179020267	0	0	0	0.0500557963338362	0	0.236666028606481	0.184370301348569	0	4	0	0	0	1	0	4	3
ENSOART00000029048	ENSOART00000029048	ensembl:	-		16:70842533-70846169	1721	0.247815237400497	0	0.0635113856925797	0.169229386742071	0	0	0.158760405956677	0	0	6	0	1	3	0	0	3	0	0
ENSOART00000029045	ENSOART00000029045	ensembl:	-		16:70469926-70666241	3955	0.251621875708086	0.421564680229246	0.331670944426357	0.0981858489955681	0.270054985646033	0.340514071392064	0.184202140210461	0.268381071630864	0.669047424767299	14	17	12	4	12	15	8	10	24
ENSOART00000029044	ENSOART00000029044	ensembl:	-		16:70401464-70405833	3679	8.4048076630349	7.01122555011692	13.0434498256002	10.9246350617669	7.98346467049511	8.76099649784793	9.97582739144037	13.5602715310298	11.8073522660431	435	263	439	414	330	359	403	470	394
ENSOART00000029046	ENSOART00000029046	ensembl:	-		16:70675260-70729492	3385	0.293992472208414	0.434622180197907	0.807296548687246	0.086039519817756	0.210344542566542	0.530470961046032	0.0269056286215107	0.376288498067971	1.98680607435149	14	15	25	3	8	20	1	12	61
ENSOART00000029041	ENSOART00000029041	ensembl:	-		16:69230773-69233542	2604	0.218384982664834	0.979264960940328	0.671647835758049	0.298252713346753	0.375972789418302	0.482693184997201	0.279769379620727	0.489146146682059	0.338720246409968	8	26	16	8	11	14	8	12	8
ENSOART00000028312	ENSOART00000028312	ensembl:	-		10:47111144-47120398	537	0.264775551755999	0	1.4248075669246	0.3615689318226	0.497238113701145	0	1.52624770468564	1.38363686556806	0.205313668913305	2	0	7	2	3	0	9	7	1
ENSOART00000028315	ENSOART00000028315	ensembl:	-		10:51156343-51158175	1775	1.08127802611876	1.93392879226511	2.70962200898652	2.24244033012343	1.95556798031031	1.11281374669669	1.48789922059399	1.913594840879	1.73920919762279	27	35	44	41	39	22	29	32	28
ENSOART00000027318	ENSOART00000027318	ensembl:	-		X:118457156-118457912	646	0.330100637435182	1.51821015967543	0.676799348463961	0.300561170880396	0.275514771629587	0.833918187938246	0.28196765598704	0.328621405046461	0	3	10	4	2	2	6	2	2	0
ENSOART00000027310	ENSOART00000027310	ensembl:	-		X:103591199-103593096	1692	0.0840333754686591	0	0	0.114753260277031	0	0	0	0	0	2	0	0	2	0	0	0	0	0
ENSOART00000027316	ENSOART00000027316	ensembl:	-		X:109831559-109832277	614	0.694609158902696	0.159684226658592	0	0.474338395086488	0	0	0	0.345748253517938	0.179565863528411	6	1	0	3	0	0	0	2	1
ENSOART00000027315	ENSOART00000027315	ensembl:	-		X:108201943-108203931	936	0	0.52396615044828	0	0	0.0951221416504293	0	0.0973029411151857	0	0	0	5	0	0	1	0	1	0	0
ENSOART00000027159	ENSOART00000027159	ensembl:	-		4:94315658-94322177	1915	3.00665383747768	7.22137887219354	8.44795279898187	1.62224556773879	1.48728522874562	3.3755955435558	0.665782131506661	2.54969025388006	9.78738498865218	81	141	148	32	32	72	14	46	170
ENSOART00000027158	ENSOART00000027158	ensembl:	-		4:92615707-92636868	5068	0.252460550650901	0.290291254926976	0.301966214435695	0.53636054251032	0.403926718996708	0.283451706980765	0.395322069133313	0.649267191935717	0.304567514382443	18	15	14	28	23	16	22	31	14
ENSOART00000027150	ENSOART00000027150	ensembl:	-		4:74429211-74430600	1219	0.174934382102648	0	0.0896661975200408	0.318560322212856	0.146007007770889	0	0.29885333185829	0.0870752369401204	0	3	0	1	4	2	0	4	1	0
ENSOART00000027153	ENSOART00000027153	ensembl:	-		4:78080474-78103201	367	0	0	0	0	0	0	0.744486808314555	0	0	0	0	0	0	0	0	3	0	0
ENSOART00000027157	ENSOART00000027157	ensembl:	-		4:91714476-91717538	2838	0.576074543261052	0.760296204061401	1.27105180528712	0.342076314990726	0.470431407782796	0.854177396466465	0.609707733000115	1.19683962035244	1.5539596928322	23	22	33	10	15	27	19	32	40
ENSOART00000027156	ENSOART00000027156	ensembl:	-		4:85470576-85474765	4072	0	0	0.0536852135446609	0	0	0.0220530694064101	0.0447325898250559	0.0521339458890014	0	0	0	2	0	0	1	2	2	0
ENSOART00000027483	ENSOART00000027483	ensembl:	-		1:101761096-101772449	5472	0.0649542183984099	0.14337914150671	0.0798999230825509	0	0.0325260494284929	0.0820378382282903	0.0332878482762477	0.0387955825402072	0.100743275042438	5	8	4	0	2	5	2	2	5
ENSOART00000027482	ENSOART00000027482	ensembl:	-		1:101515087-101517609	2039	4.1137172934197	2.6936229758409	6.7011356225673	2.9043436732989	1.26588246492906	2.42178595323063	1.83121274773024	3.07137720253575	1.13551851119928	118	56	125	61	29	55	41	59	21
ENSOART00000027481	ENSOART00000027481	ensembl:	-		1:101427257-101524132	1605	0.0442744800561722	0.0610879222232869	0.204304850050336	0.0604867652301358	0.277258199084254	0.167794924323614	0.113489785525002	0.529070224697853	0.480856125510973	1	1	3	1	5	3	2	8	7
ENSOART00000027480	ENSOART00000027480	ensembl:	-		1:101427257-101580342	1348	0.263671723350222	0.436556700287809	0	0	0	0.0666172838448828	0	0.157484738620188	0.0817903859098253	5	6	0	0	0	1	0	2	1
ENSOART00000027486	ENSOART00000027486	ensembl:	-		1:102589867-102629631	545	2.7390430693478	1.7995665378905	0.601668411616127	2.85009198368787	2.28633029486747	1.97692164920406	3.17495513074188	0.389521885614704	0.606899670861163	21	10	3	16	14	12	19	2	3
ENSOART00000027488	ENSOART00000027488	ensembl:	-		1:104515795-104658975	1289	0.0551284255160251	0	0	0.225945519459351	0	0.069666484579443	0.0706559758602125	0	0.0855340886008103	1	0	0	3	0	1	1	0	1
ENSOART00000028311	ENSOART00000028311	ensembl:	-		10:47007677-47034922	560	2.28476798339065	2.27679103418626	2.1472419471952	4.1606253511872	2.54291527352765	0	6.17967166780449	4.35951503230385	0.196881143225794	18	13	11	24	16	0	38	23	1
ENSOART00000028235	ENSOART00000028235	ensembl:	-		13:49259441-49380255	4051	0.0350986105388722	0	0	0.071894291430043	0	0.0443347808555429	0	0	0	2	0	0	3	0	2	0	0	0
ENSOART00000028237	ENSOART00000028237	ensembl:	-		13:53835333-53838784	685	0	0	0.159566561718146	0	0	0.262190068971977	0	0	0	0	0	1	0	0	2	0	0	0
ENSOART00000028236	ENSOART00000028236	ensembl:	-		13:53357366-53499994	924	0.230784644786935	0.530770905648907	0.473173570462899	0.420265186988606	0	0.874482687172627	0.0985666156751232	0.229750462835513	0	3	5	4	4	0	9	1	2	0
ENSOART00000027194	ENSOART00000027194	ensembl:	-		5:4518875-4520108	918	0	0.320522021779938	0.714399312267514	0.317259013707085	0.19388076522082	0.880198260291402	0	0.462504199695019	0.360305360151779	0	3	6	3	2	9	0	4	3
ENSOART00000027193	ENSOART00000027193	ensembl:	-		5:4418367-4425268	836	0	0	0.130745328680538	0.232251813862124	0.212897778077408	0.322142169305503	0.326826146712251	0.253934722081356	0	0	0	1	2	2	3	3	2	0
ENSOART00000028239	ENSOART00000028239	ensembl:	-		13:53874274-54065857	1770	0.0803302097700402	0.166236845194341	0.123506321781841	0.0548481684713943	0	0	0	0.0599687648757101	0.373740475276083	2	3	2	1	0	0	0	1	6
ENSOART00000028238	ENSOART00000028238	ensembl:	-		13:53863349-53868719	3344	0.170058162338285	0.381280795198657	0.523017632869007	0.0870944301982966	0.239548624752555	0.429585302326111	0.217858691546762	0.253934722081356	0.428616842907829	8	13	16	3	9	16	8	8	13
ENSOART00000027728	ENSOART00000027728	ensembl:	-		2:56132256-56181717	2328	0.0610758038200048	0.252782831609951	0.187806004771357	0	0.0764529821618184	0	0	0	0	2	6	4	0	2	0	0	0	0
ENSOART00000027727	ENSOART00000027727	ensembl:	-		2:55161531-55217512	1113	8.49424494177754	35.8647606065811	27.695682340827	52.9455662387722	8.15661739430803	3.54932556913202	50.5669707682453	32.9022010187851	60.9208404309585	133	407	282	607	102	44	618	345	615
ENSOART00000027720	ENSOART00000027720	ensembl:	-		2:43205223-43210162	754	0.377063066675443	0.910510009491169	1.3046788501225	0.643774921713316	1.18036978655233	0.714471020435155	0.241579715872185	1.40775482533166	1.60847193935131	4	7	9	5	10	6	2	10	11
ENSOART00000028398	ENSOART00000028398	ensembl:	-		11:58911832-58916313	1468	0	0.200435433238408	0	0	0	0	0	0	0.0751045233013927	0	3	0	0	0	0	0	0	1
ENSOART00000028392	ENSOART00000028392	ensembl:	-		11:54096210-54271589	600	0.355408352971879	0.326988501376012	0.546515473884648	0.48540629097184	0.14839054097467	0	0.30358517627938	0.530723569150034	0.183755733677408	3	2	3	3	1	0	2	3	1
ENSOART00000028393	ENSOART00000028393	ensembl:	-		11:54225864-54263405	2676	0	0.21990972794767	0	0.0725569941661943	0.0997820878391311	0.167754503282961	0.0340342125873744	0.118996315952922	0.412008371474008	0	6	0	2	3	5	1	3	10
ENSOART00000028390	ENSOART00000028390	ensembl:	-		11:52895985-52899693	3558	0	0.0275565247803192	0	0.109141380769385	0.0500231991210548	0	0.153584406212165	0.149163453948857	0	0	1	0	4	2	0	6	5	0
ENSOART00000028391	ENSOART00000028391	ensembl:	-		11:53771448-53790098	3030	0.0703778916775999	0	0.108220885917752	0.0640800384121241	0	0.0592739924903644	0.0601158764909662	0	0	3	0	3	2	0	2	2	0	0
ENSOART00000028394	ENSOART00000028394	ensembl:	-		11:54738796-54740870	1909	0.186186214288161	4.26424839794942	3.72187821065987	1.62734429660544	3.12374708562407	0.188114694689525	1.43116640620123	0.222409038931392	0.404281865607707	5	83	65	32	67	4	30	4	7
ENSOART00000028395	ENSOART00000028395	ensembl:	-		11:54738857-54740870	1732	3.36539609097724	0	0	0	0	5.39106926551178	0	3.002939363551	5.85634827256327	82	0	0	0	0	104	0	49	92
ENSOART00000028159	ENSOART00000028159	ensembl:	-		23:16763373-16923865	1191	0	0	0.0917742189562802	0	0	0	0	0	0.277716474071649	0	0	1	0	0	0	0	0	3
ENSOART00000028155	ENSOART00000028155	ensembl:	-		23:15770856-15798978	923	0.0769886679199961	0	0	0	0	0.194583095607588	0.197346810149109	0.344999069870011	0	1	0	0	0	0	2	2	3	0
ENSOART00000027393	ENSOART00000027393	ensembl:	-		12:77920132-77921048	743	303.658964526413	866.063699477914	413.698565146241	290.852283633582	394.585966585881	600.560700692963	233.618828088176	393.008979790359	349.155891479512	3174	6561	2812	2226	3294	4970	1906	2751	2353
ENSOART00000027392	ENSOART00000027392	ensembl:	-		12:77881996-77901353	1928	1.62223964033683	5.03614750353928	1.13391252252162	1.35954044151864	2.07736872363373	2.56121450136787	1.03915572944379	2.14711817394723	1.48682025174666	44	99	20	27	45	55	22	39	26
ENSOART00000027395	ENSOART00000027395	ensembl:	-		12:78236083-78238032	1712	0.249118004419542	1.60408823546391	0.51076212512584	0.283531712016262	0.519859123282977	0.471975469011395	0.212793347859378	0.744005003481356	0.837204861380712	6	28	8	5	10	9	4	12	13
ENSOART00000027394	ENSOART00000027394	ensembl:	-		12:78017781-78023195	5352	3.70558542943426	3.55511931464803	4.24820247390047	3.37390022872804	3.94129593747428	3.84157478279083	3.99876599235539	4.30372097017735	3.83163252925487	279	194	208	186	237	229	235	217	186
ENSOART00000027399	ENSOART00000027399	ensembl:	-		12:78533854-78549359	1013	0.280657011128612	2.22681810690487	2.05022729382502	0.670847786140746	0.527180389057285	0.974947877782144	0.359627059758396	0.314347622398836	0.21767707839377	4	23	19	7	6	11	4	3	2
ENSOART00000027398	ENSOART00000027398	ensembl:	-		12:78533854-78566392	4901	0.507639867622941	1.0606117183729	0.691417840002243	0.752721446926338	0.454005948652934	0.970908255741981	0.520290871999696	0.671390762850482	0.809859997435626	35	53	31	38	25	53	28	31	36
ENSOART00000028849	ENSOART00000028849	ensembl:	-		15:15443815-15446923	1369	0.467300975419564	0.214930033596774	0.319366237478246	0.354569971491483	0.520099544622164	0.262316254318702	0.266108262626191	0	0.402678744362471	9	3	4	5	8	4	4	0	5
ENSOART00000028845	ENSOART00000028845	ensembl:	-		15:5512486-5584419	3239	0.0658366816249236	0.0302704894005482	0.0674918769848284	0.149863010488373	0.0274882138267372	0.19404484347978	0	0.0655416571966699	0.170196727703681	3	1	2	5	1	7	0	2	5
ENSOART00000028842	ENSOART00000028842	ensembl:	-		26:36267682-36284334	1266	0	0	0	0.15336691657878	0	0.14186429482291	0.0719396152320805	0	0.261264076318589	0	0	0	2	0	2	1	0	3
ENSOART00000027837	ENSOART00000027837	ensembl:	-		24:300576-303886	1097	0	0.26822171011302	0.398552761265012	0	0.162244797149237	0.245497587547311	0.249067145534587	0.580554496791286	0.201009006757419	0	3	4	0	2	3	3	6	2
ENSOART00000027834	ENSOART00000027834	ensembl:	-		2:247880373-247882695	926	2.76350273402828	11.0151445282446	5.19392987683702	3.45969926610599	4.61358938037079	8.91998884346672	1.96698282844291	5.50210179680381	5.23869338895274	36	104	44	33	48	92	20	48	44
ENSOART00000027835	ENSOART00000027835	ensembl:	-		2:248965542-248983447	718	4.65309615369435	7.10308066375659	7.30750897640501	4.19153064627494	3.34688815713196	5.00179443771816	4.31253326040863	5.32201907782764	8.44542885855311	47	52	48	31	27	40	34	36	55
ENSOART00000027832	ENSOART00000027832	ensembl:	-		2:247868324-247870830	2041	0.313441957545019	0.672733510197297	0.107107393216002	0.237827678085174	0.13082649047404	0.527889416372471	0.267738029055798	0.26003114608037	0.43215459169601	9	14	2	5	3	12	6	5	8
ENSOART00000027833	ENSOART00000027833	ensembl:	-		2:247878395-247914967	2044	0.139092735945834	0.479825715826969	0.32085057175224	0.142487169561205	0.261268950154124	0.395314091461599	0.222787555978018	0.36350929393838	0	4	10	6	3	6	9	5	7	0
ENSOART00000028452	ENSOART00000028452	ensembl:	-		18:26817254-26869150	3580	0.0198493129860772	0	0	0	0	0.0752264954020672	0	0	0.092391151010987	1	0	0	0	0	3	0	0	3
ENSOART00000028459	ENSOART00000028459	ensembl:	-		18:42640907-42757716	3466	0.102547456167368	0.254679067507775	0.883037536536964	0.504172719993833	0.205428816095713	0.362646582150234	0.15766108404584	0.459368351832113	0.922489834387447	5	9	28	18	8	14	6	15	29
ENSOART00000028294	ENSOART00000028294	ensembl:	-		10:30554168-30558316	4113	0.0518465868667949	0.119239561589981	0.345504906390268	0.0472070304859557	0.0865672724634857	0.174622393465744	0.155003372279771	0.387106906746925	0.241254792574277	3	5	13	2	4	8	7	15	9
ENSOART00000028293	ENSOART00000028293	ensembl:	-		10:24685829-24705397	1078	0.131896541088099	0.181997310598894	0.304183009583292	0.0900568257832727	0	0	0	0.0984644840723626	0.306827755676562	2	2	3	1	0	0	0	1	3
ENSOART00000028290	ENSOART00000028290	ensembl:	-		10:19734316-19746131	480	0.888520882429698	1.02173399337415	1.13857390392635	2.4270314548592	1.85416420637595	2.99277760620524	2.27671182514089	3.09588748670853	4.82358800903195	6	5	5	12	10	16	12	14	21
ENSOART00000028299	ENSOART00000028299	ensembl:	-		10:35824350-35826474	406	41.4944243171011	32.6119756361149	20.1926549256209	38.2586239189628	24.7717938510101	38.6992285159659	40.824251635119	23.791056548105	16.2933131070772	237	135	75	160	113	175	182	91	60
ENSOART00000028298	ENSOART00000028298	ensembl:	-		10:35100243-35117068	929	0	0	0	0	0	0.0966631847393994	0	0	0.356039096468604	0	0	0	0	0	1	0	0	3
ENSOART00000027216	ENSOART00000027216	ensembl:	-		5:41141859-41143692	912	0	0	0	0.10644874802014	0.292781652475345	0	0.0998635448287433	0	0	0	0	0	1	3	0	1	0	0
ENSOART00000027214	ENSOART00000027214	ensembl:	-		5:37864537-37870628	3916	0.181526804431103	0.300550782424906	0.530357571155452	0.0743727718547252	0.0681861253977311	0.114635099791932	0.11628645669537	0.162632350097048	0.394164495120077	10	12	19	3	3	5	5	6	14
ENSOART00000027210	ENSOART00000027210	ensembl:	-		5:31921124-31935371	5380	0.0528448981920602	0.0911584232006674	0.28445441910039	0	0.0496313879289061	0.0500577794682901	0.0338570828564364	0.0394590014237944	0.102466022496696	4	5	14	0	3	3	2	2	5
ENSOART00000027211	ENSOART00000027211	ensembl:	-		5:35355007-35368975	3937	1.04720410083691	1.22066870728556	0.111052166397693	0.197269511189978	0.452142175468073	1.57352161858521	0.277577260875699	0.161764867406665	0.756119605175007	58	49	4	8	20	69	12	6	27
ENSOART00000028145	ENSOART00000028145	ensembl:	-		23:9564615-9617909	1456	0.829951600418001	0.943028224115854	0.150141613704574	0.200030064960923	0.305631462589442	0.493284274948218	0.187655672150715	0.145803178337922	0.302894066501221	17	14	2	3	5	8	3	2	4
ENSOART00000028143	ENSOART00000028143	ensembl:	-		23:3438959-3460788	930	0.30570489491751	1.26554501502788	0.352590628312676	1.148272946385	0.669873066669829	0.675818546269902	0.489653510128031	0	0.711312517460932	4	12	3	11	7	7	5	0	6
ENSOART00000028648	ENSOART00000028648	ensembl:	-		6:115566941-115604131	4840	0.0881177734641023	0.42553174410517	0.24844121703085	0.100290555985917	0.147110800947881	0.222607912978557	0.112903577955141	0.285099437973159	0.387253818906933	6	21	11	5	8	12	6	13	17
ENSOART00000028640	ENSOART00000028640	ensembl:	-		6:114605315-114608068	2678	0	0	0.0816303919170498	0	0	0	0	0	0.0411700672914281	0	0	2	0	0	0	0	0	1
ENSOART00000028642	ENSOART00000028642	ensembl:	-		6:115019026-115108861	1112	0.255670460677414	1.41118902440494	0.58976489987552	0.0873032897431367	0.640302407003366	1.21109096434857	0.245707426844822	0.381815517374125	0.694041440148482	4	16	6	1	8	15	3	4	7
ENSOART00000028644	ENSOART00000028644	ensembl:	-		6:115325076-115335740	4189	0.0848482891086414	0.210722761513953	0	0	0	0.0857271310962766	0.0869663909131667	0.0253389147362155	0.0789592553400176	5	9	0	0	0	4	4	1	3
ENSOART00000028645	ENSOART00000028645	ensembl:	-		6:115327069-115335740	4149	0	0	0.10537777274228	0	0.171611539307723	0.389502050107258	0	0	0.132867486390027	0	0	4	0	8	18	0	0	5
ENSOART00000028646	ENSOART00000028646	ensembl:	-		6:115335330-115339099	2937	0.0968013456837876	0.0668005110063355	0.148863595201811	0	0.0909148338636415	0.275118148773411	0	0.072281044487577	0.0750789514514433	4	2	4	0	3	9	0	2	2
ENSOART00000028647	ENSOART00000028647	ensembl:	-		6:115548916-115714433	1888	0	0.20777824743769	0	0.102840315883864	0.188586436251227	0	0	0	0.29198474630944	0	4	0	2	4	0	0	0	5
ENSOART00000027500	ENSOART00000027500	ensembl:	-		1:123359524-123378720	585	7.89810787872019	7.71202305057994	4.29759423547431	1.82545955579153	1.21712184032093	3.6833421458173	1.40101712378835	1.99588350791466	2.4500764490321	65	46	23	11	8	24	9	11	13
ENSOART00000027575	ENSOART00000027575	ensembl:	-		1:261789777-261885079	1046	0.271802631236409	0.375033777401872	0	0.185623820639327	0.0851188571556423	0.858338529226013	0.261210954733692	0.507383909321256	0.316214455659019	4	4	0	2	1	10	3	5	3
ENSOART00000027573	ENSOART00000027573	ensembl:	-		1:257214008-257215000	879	0	0	0	0.110445117399736	0.202482983472939	0	0	0	0	0	0	0	1	2	0	0	0	0
ENSOART00000027572	ENSOART00000027572	ensembl:	-		1:254235176-254258083	1928	88.6330058864617	99.4508204356495	182.730434497097	138.32088887904	139.691099806786	152.228942437031	172.314378843363	201.114445427393	166.750345004727	2404	1955	3223	2747	3026	3269	3648	3653	2916
ENSOART00000027571	ENSOART00000027571	ensembl:	-		1:253580414-253584230	3587	0.455784653965672	0.328117330352922	0.426641977909144	0.460100749736341	0.272939265025162	0.275333760856792	0.66010439305907	0.325506510211897	0.430317302171793	23	12	14	17	11	11	26	11	14
ENSOART00000027570	ENSOART00000027570	ensembl:	-		1:252722136-252724322	510	0.418127474084564	0	0	0	0	0	0	0	0	3	0	0	0	0	0	0	0	0
ENSOART00000027908	ENSOART00000027908	ensembl:	-		3:1613670-1618194	4379	0.373349978025774	0.425549534398784	0.374438883200966	0.17735785922698	0.0609766766516362	0.389551062917999	0.0831930147374413	0.145436922352145	0.830866299797367	23	19	15	8	3	19	4	6	33
ENSOART00000027909	ENSOART00000027909	ensembl:	-		3:1690528-1699560	2459	0.173440432519827	1.15666741532436	0.489001826120094	0.276359824058795	0.470522849173636	0.803271411299969	0	0.474823852025244	0.538040375143284	6	29	11	7	13	22	0	11	12
ENSOART00000027906	ENSOART00000027906	ensembl:	-		3:1516950-1531301	5373	0.0661510297926854	0.0912771853377239	0.0406860579850846	0.0361367050788639	0.033125356871899	0.0668362092243258	0.0508517883215041	0.0395104090191725	0.184679129324028	5	5	2	2	2	4	3	2	9
ENSOART00000027904	ENSOART00000027904	ensembl:	-		3:1428154-1485459	1469	0.193536795284741	0.133555548553851	0	0	0.121158980580472	0	0	0	0.300213588036609	4	2	0	0	2	0	0	0	4
ENSOART00000027905	ENSOART00000027905	ensembl:	-		3:1476799-1477426	599	0	0.327534392029395	0	0	0	0	0	0	0.368125009036543	0	2	0	0	0	0	0	0	2
ENSOART00000027902	ENSOART00000027902	ensembl:	-		3:1067875-1077130	3982	0	0	0	0	0	0	0	0	0.0830638675588482	0	0	0	0	0	0	0	0	3
ENSOART00000027901	ENSOART00000027901	ensembl:	-		3:978878-980084	887	4.40766350982161	7.51888851377173	4.68293178950338	6.23859269118261	7.42527073107023	6.37682464820953	3.7988056156558	5.14568511239041	4.97197024606289	55	68	38	57	74	63	37	43	40
ENSOART00000028219	ENSOART00000028219	ensembl:	-		13:40190479-40191504	615	0.462285450850868	0	0	0	0.289402508085712	0.146016420525044	0	0.345186061235795	0	4	0	0	0	2	1	0	2	0
ENSOART00000028214	ENSOART00000028214	ensembl:	-		13:35921377-35932229	5150	0	0.0190380806152186	0.0424478037968659	0	0	0.0871671943272242	0	0	0.149859044940798	0	1	2	0	0	5	0	0	7
ENSOART00000027290	ENSOART00000027290	ensembl:	-		X:77639867-77643487	892	0	0	0	0.326506473747874	0.199531998287795	0	0	0	0	0	0	0	3	2	0	0	0	0
ENSOART00000027299	ENSOART00000027299	ensembl:	-		X:89367880-89394753	4562	0.0934875106458253	0.150487625417874	0.167716278701996	0.0425608321763998	0.195089613998346	0.255837999804868	0.23954881106261	0.139602867816756	0.265845647143992	6	7	7	2	10	13	12	6	11
ENSOART00000028969	ENSOART00000028969	ensembl:	-		14:46957565-47106327	1232	7.78918757426248	4.85611165954479	10.4695567134547	3.86118640545782	4.47908585789458	5.6113445752391	5.39617740895107	9.39114085937375	5.99582727509616	135	61	118	49	62	77	73	109	67
ENSOART00000028968	ENSOART00000028968	ensembl:	-		14:46956959-47106327	1937	15.7065944439527	35.8486010202733	21.2750106807249	20.3485195284902	19.8500163565392	24.3343164120378	14.7159416441893	23.2894821065092	18.2140504400666	428	708	377	406	432	525	313	425	320
ENSOART00000028965	ENSOART00000028965	ensembl:	-		14:46786832-46811687	1133	0.125493796375085	0	0.385889125426054	0.257055405633808	0	0	0.321537697736324	0.281053964245384	0.291933204430127	2	0	4	3	0	0	4	3	3
ENSOART00000028966	ENSOART00000028966	ensembl:	-		14:46834703-46995143	2406	7.79966948009303	5.05467637550088	4.63404942089038	7.10153842153315	3.40329024971088	5.29884462880392	7.72162234778225	5.24993045596365	4.39908934700971	264	124	102	176	92	142	204	119	96
ENSOART00000028961	ENSOART00000028961	ensembl:	-		14:42981115-43008206	5477	0.0778692758017629	0.358139040770613	0.199589628565343	0.0177252616750718	0.0324963561206341	0.42621058107521	0.049886189273588	0.755823231581206	0.221432872424848	6	20	10	1	2	26	3	39	11
ENSOART00000028963	ENSOART00000028963	ensembl:	-		14:45452016-45457298	549	0.776848858954928	0.535954856091044	1.39366423212843	1.41466314308733	0.48636952105194	0.981258924240632	1.32699356016826	1.74007727590175	2.2090853228978	6	3	7	8	3	6	8	9	11
ENSOART00000027436	ENSOART00000027436	ensembl:	-		1:17971643-18117954	770	0.646251888791	1.01892293808405	0.567808284555479	0.378238668289745	0.577921311078218	1.16600272931222	0.236559877620296	0	1.00230400187677	7	8	4	3	5	10	2	0	7
ENSOART00000027439	ENSOART00000027439	ensembl:	-		1:27103901-27108637	4142	0.274589326344388	0.544608098091413	0.686142422038449	0.351573846672023	0.236367248586494	0.455201424858455	0.219862523008209	0.589408116390671	0.372657692634047	16	23	26	15	11	21	10	23	14
ENSOART00000028551	ENSOART00000028551	ensembl:	-		9:43909377-43912958	397	25.4252636159894	8.39969141335564	17.8968904386642	22.4974200349669	19.5045766530835	19.4490880654191	24.774508924803	17.6462244654419	15.551817029339	142	34	65	92	87	86	108	66	56
ENSOART00000028028	ENSOART00000028028	ensembl:	-		3:196673376-196806003	1783	0.0797445155877573	0.38503900569621	0.183908740510818	0	0.0499351231546841	0.151043664351879	0	0.178594583000572	0.123671834219231	2	7	3	0	1	3	0	3	2
ENSOART00000028003	ENSOART00000028003	ensembl:	-		3:131784124-131789872	2861	0.0745351316963046	0	0	0	0	0.0313876611754289	0	0	0.847806950206844	3	0	0	0	0	1	0	0	22
ENSOART00000028027	ENSOART00000028027	ensembl:	-		3:191414093-191417755	3586	0.0396498804497968	0	0	0.0812168919640558	0	0.0500837136770229	0	0.0295997528806489	0.0614910430599244	2	0	0	3	0	2	0	1	2
ENSOART00000028021	ENSOART00000028021	ensembl:	-		3:178934040-178937565	1571	0.180971070829589	0	0.278301959966721	0	0	0.114322213396438	0	0	0	4	0	4	0	0	2	0	0	0
ENSOART00000028022	ENSOART00000028022	ensembl:	-		3:179334843-179355619	1386	0	0.424587613266931	0	0.140088395662869	0.706373119513173	0.12958167189452	0.262844308466995	0	0	0	6	0	2	11	2	4	0	0
ENSOART00000028001	ENSOART00000028001	ensembl:	-		3:131586302-131591585	273	1254.50450426501	455.17937417569	1110.71162419915	984.683008934306	306.132647722626	175.617556384852	437.668110463711	595.657858746492	841.630094602506	4818	1267	2774	2769	939	534	1312	1532	2084
ENSOART00000027645	ENSOART00000027645	ensembl:	-		17:70520104-70522300	1080	0	0.544887437025894	0.303619707713694	0.269670161651022	0	0.1662964789313	0	0	0	0	6	3	3	0	2	0	0	0
ENSOART00000027644	ENSOART00000027644	ensembl:	-		17:70495492-70501242	3769	0.396067517324105	1.22305133198368	1.07308500995292	0.746977046335015	0.708432625067195	1.31016756663233	0.507429464585289	0.675901600403334	0.877581110690723	21	47	37	29	30	55	21	24	30
ENSOART00000027646	ENSOART00000027646	ensembl:	-		17:70641860-70698565	2554	0.0556712886816645	0.0768179721321877	0.0855936529185041	0.0380114558317807	0	0	0	0	0	2	2	2	1	0	0	0	0	0
ENSOART00000027642	ENSOART00000027642	ensembl:	-		17:70461036-70468862	2368	0	0	0.138475204531583	0.0409971529537027	0	0.113729245582517	0.0769219196653833	0.0896492515456139	0.0931194596338214	0	0	3	1	0	3	2	2	2
ENSOART00000027649	ENSOART00000027649	ensembl:	-		17:70666176-70788318	1412	0.302046758899614	0.764029658865935	0.232230371339086	0.206263296446957	0.441205348444009	0.890179216524584	0.322505498880361	0.601386480623268	0.624665383605918	6	11	3	3	7	14	5	8	8
ENSOART00000027648	ENSOART00000027648	ensembl:	-		17:70694838-70698565	1756	0.121437933817271	0	0	0	0.152059719281045	0.409010196084627	0.155596047068019	0.241787503029628	0.690653668719186	3	0	0	0	3	8	3	4	11
ENSOART00000028189	ENSOART00000028189	ensembl:	-		23:55352712-55370228	4467	0	0	0.220221144614365	0.0217329881787258	0.0597754347565514	0.100494974431432	0	0	0.123408820468373	0	0	9	1	3	5	0	0	5
ENSOART00000028188	ENSOART00000028188	ensembl:	-		23:55302407-55306065	728	0.390529604770995	0	0	0	0	0.246703567645335	0	0	0.151447033250611	4	0	0	0	0	2	0	0	1
ENSOART00000028182	ENSOART00000028182	ensembl:	-		23:47034890-47190729	1898	0.224704964998027	0.516735386275197	1.09424670634602	0.511492403553045	0.844099685113324	0.425722867727875	0.431820346373123	0.559245067597507	0.580892730276315	6	10	19	10	18	9	9	10	10
ENSOART00000028184	ENSOART00000028184	ensembl:	-		23:47666578-47826985	3699	0	0	0.0886480898434142	0.0787358136207364	0.0721862306184144	0.169913827529335	0.0738650063940096	0.057391032078944	0.0298062828349404	0	0	3	3	3	7	3	2	1
ENSOART00000027986	ENSOART00000027986	ensembl:	-		3:103581031-103585295	2534	0.224417716992591	0.387041737628384	0.345076858017142	0.26818027125516	0.245849231256094	0.35431022161421	0.179707089352435	0.251329235588019	0.304567514382443	8	10	8	7	7	10	5	6	7
ENSOART00000027984	ENSOART00000027984	ensembl:	-		3:100723193-100724856	1622	0.0438104441986168	2.35820526352215	0.269551405121898	0.83793934323129	0.274352287010005	0	0.842199959752817	0	0.611763848247843	1	39	4	14	5	0	15	0	9
ENSOART00000027985	ENSOART00000027985	ensembl:	-		3:100723193-100724856	1577	0	0	0	0	0.112861472715734	0	0.11550482293445	0	0	0	0	0	0	2	0	2	0	0
ENSOART00000027982	ENSOART00000027982	ensembl:	-		3:98598810-98622278	655	0	0.299531451642149	0	0	0	0.137099387210538	0	0	0.168325862910602	0	2	0	0	0	1	0	0	1
ENSOART00000027980	ENSOART00000027980	ensembl:	-		3:97408005-97409061	917	0	0	0	0	0	0.195856267443625	0	0	0.360698277665576	0	0	0	0	0	2	0	0	3
ENSOART00000027328	ENSOART00000027328	ensembl:	-		X:129003928-129007334	2782	0	0	0.0392893942404492	0	0.0320037112094902	0	0.16368719066106	0.0381541027426337	0.0396309993553	0	0	1	0	1	0	5	1	1
ENSOART00000027329	ENSOART00000027329	ensembl:	-		X:129003928-129007334	2478	0	0	0.0882188012727439	0	0.143684903810459	0	0	0.128504496162236	0.177971654893373	0	0	2	0	4	0	0	3	4
ENSOART00000027828	ENSOART00000027828	ensembl:	-		2:241546871-241575651	3579	0.0595822888469203	0.0548178543798847	0.183240728880016	0	0.124336241835772	0	0	0.0593152913271902	0.0924169658059049	3	2	6	0	5	0	0	2	3
ENSOART00000027826	ENSOART00000027826	ensembl:	-		2:238819661-238826754	689	0.412635054097655	0.569354617071638	0.475920586837139	0.281803361957527	0.645862713396557	0.912207907156762	0.660925637763526	0.616224753730083	1.92023408197001	4	4	3	2	5	7	5	4	12
ENSOART00000027821	ENSOART00000027821	ensembl:	-		2:233757234-233764831	4929	0.374953249250962	0.318369282844044	0.17740408971707	0.21665527290283	0.270863123409936	0.327864476748836	0.498857782671272	0.323021040261737	0.201314863432339	26	16	8	11	15	18	27	15	9
ENSOART00000027820	ENSOART00000027820	ensembl:	-		2:233072574-233120716	3191	0	0	0	0	0	0.0281416792926675	0	0.0332637774459439	0.0345513758089767	0	0	0	0	0	1	0	1	1
ENSOART00000027822	ENSOART00000027822	ensembl:	-		2:233790223-233795927	1226	0	2.3999113290791	1.78318380376972	2.05881950493766	1.88753464839546	1.75754906631576	2.59989758063394	1.73156140016324	1.61872913843067	0	30	20	26	26	24	35	20	18
ENSOART00000027770	ENSOART00000027770	ensembl:	-		2:136213089-136218543	5035	0.832949967325731	0.759683999490153	1.19404857127714	0.539875914487051	0.583336530473838	1.12338499760911	0.343664458044553	0.758929433541261	1.27002546992263	59	39	55	28	33	63	19	36	58
ENSOART00000027778	ENSOART00000027778	ensembl:	-		2:156611429-156617720	3359	3.36476308001084	4.20457867110587	4.62098529130861	4.21966766787071	3.52409409000533	4.27661614323506	3.30769210584108	5.02444811856172	6.17070681065345	159	144	142	146	133	160	122	159	188
ENSOART00000027414	ENSOART00000027414	ensembl:	-		1:945528-954613	467	0.152163898265859	0.209948854750269	0	0	0	0.384582863481379	0	0	0	1	1	0	0	0	2	0	0	0
ENSOART00000028699	ENSOART00000028699	ensembl:	-		19:59259820-59261696	1649	2.45711461764993	5.70979573731337	1.92239699472234	2.17829384668988	2.4288459061042	4.51903436391915	1.60158951883222	2.96098049495471	2.67443153927094	57	96	29	37	45	83	29	46	40
ENSOART00000028698	ENSOART00000028698	ensembl:	-		19:59095744-59139872	2887	0.0492499034613686	0.339717271614245	0.227162649345888	0.134508151291123	0.154139040363778	0.248777937071218	0.126187118647473	0.183832202684459	0.343706602652581	2	10	6	4	5	8	4	5	9
ENSOART00000028697	ENSOART00000028697	ensembl:	-		19:59014409-59020528	5178	0.151008015960285	0.530359030342646	0.485533531817781	0.281231918291912	0.32658351105311	0.19073429899446	0.123122609151544	0.327986755751276	0.4471460495047	11	28	23	15	19	11	7	16	21
ENSOART00000028696	ENSOART00000028696	ensembl:	-		19:58969137-58984767	940	4.83971549846931	8.76435777324874	5.81438200265504	5.78356431796235	8.33219696719368	10.792929756185	3.10026359064443	5.64599541648973	9.50043336788158	64	84	50	56	88	113	32	50	81
ENSOART00000028695	ENSOART00000028695	ensembl:	-		19:58942416-58953095	918	0.232293041158091	0.534239996535502	0	0	0	0.39118840104826	0	0.115626049923755	0.24020357343452	3	5	0	0	0	4	0	1	2
ENSOART00000028344	ENSOART00000028344	ensembl:	-		10:85816718-85837826	593	0	0	0	0.163712071154078	0	0.454149837334571	0	0	0.371849714018363	0	0	0	1	0	3	0	0	2
ENSOART00000028347	ENSOART00000028347	ensembl:	-		10:86170453-86173521	2083	0.136488503251697	0.847544549190541	0.839640405335555	0.279638765802308	0.128188606364626	0.689646303878308	0.349745302223895	0.560533774426344	0.793951801774685	4	18	16	6	3	16	8	11	15
ENSOART00000028341	ENSOART00000028341	ensembl:	-		10:85735698-85742240	3406	0.041745293979146	0.0863884955942404	0	0	0.0522555908610432	0.0527305335425144	0	0	0	2	3	0	0	2	2	0	0	0
ENSOART00000028340	ENSOART00000028340	ensembl:	-		10:85726269-85729311	2872	0.296998623653381	0.682983121970978	0.723147718887447	0.304223998519955	0.247916530845314	0.50018567234628	0.285374309685302	0.665252384728455	0.460668970221913	12	20	19	9	8	16	9	18	12
ENSOART00000028342	ENSOART00000028342	ensembl:	-		10:85784526-85835217	1415	0.100483725295386	0.346595276904304	0.154492006751844	0.205825989104667	0.18870449968729	0.317251625996611	0	0.150027864070681	0.155835251175187	2	5	2	3	3	5	0	2	2
ENSOART00000028107	ENSOART00000028107	ensembl:	-		21:43684593-43705027	4825	0.471439995738219	0.528498644204894	0.385134520018837	0.342047956332488	0.424269556865351	0.521008519681953	0.547361889441311	0.461976992835263	0.594111802148717	32	26	17	17	23	28	29	21	26
ENSOART00000028106	ENSOART00000028106	ensembl:	-		21:43263433-43268197	4336	0.47541272540155	0.294050502570182	0.731096089551922	0.403012603205402	0.348954538228849	0.28988308434795	0.420070594819682	0.636476605069229	0.889960887275267	29	13	29	18	17	14	20	26	35
ENSOART00000028108	ENSOART00000028108	ensembl:	-		21:44569610-44571902	826	2.40959931822151	3.68091800860558	3.7053366847907	3.05582652912054	2.80159501081457	3.36957191686941	2.5357963671325	2.18457643475801	4.67175594095104	28	31	28	26	26	31	23	17	35
ENSOART00000028811	ENSOART00000028811	ensembl:	-		22:50456021-50592685	2262	2.79682431194915	3.64212922495748	2.36791157724085	3.60513956159457	1.65258622109121	3.73099463585145	2.77797893735299	2.48703352475259	3.41185655328815	89	84	49	84	42	94	69	53	70
ENSOART00000028810	ENSOART00000028810	ensembl:	-		22:50130348-50592685	1173	1.39377626067763	0.585272418718109	0.931928726046361	0.413816104835328	0.303538952806749	0.53581521571271	0.310573070362537	0.452449760571214	0.375970810593161	23	7	10	5	4	7	4	5	4
ENSOART00000028813	ENSOART00000028813	ensembl:	-		22:50497558-50499425	1070	0.199294403535633	0.274989921489704	0.715066975176175	0.181460295690407	0.166338824740853	0.50346836393281	0.170234678287503	0.297602001392543	0.30912179497134	3	3	7	2	2	6	2	3	3
ENSOART00000028815	ENSOART00000028815	ensembl:	-		26:1071944-1073021	659	0	0.148780144413316	0	0	0	0	0.276405319829481	0.322138736965119	0.16730415812814	0	1	0	0	0	0	2	2	1
ENSOART00000028814	ENSOART00000028814	ensembl:	-		22:50826786-50829290	2365	0.420788379883925	1.74175397607903	1.38661130616239	0.164196631195548	0.526871040466289	0.645384080169733	0.423571299443473	0.538577829158597	0.885757024914354	14	42	30	4	14	17	11	12	19
ENSOART00000028537	ENSOART00000028537	ensembl:	-		9:33752330-33767686	1207	0	0.325008559372294	1.26790784984267	0.16086372525993	0.221223584968944	1.26456781242868	0.150912266584613	0	1.82690041767099	0	4	14	2	3	17	2	0	20
ENSOART00000028535	ENSOART00000028535	ensembl:	-		9:32820102-32835281	698	0	0.281078941010899	0.62637876662997	0.278169794253203	0.765091309620387	0.643139041239548	0	0.304139581174805	0.473868654182426	0	2	4	2	6	5	0	2	3
ENSOART00000027128	ENSOART00000027128	ensembl:	-		4:28466054-28471449	3603	0	0	0	0.107778249452532	0	0	0.0758330998199949	0.117840370613385	0	0	0	0	4	0	0	3	4	0
ENSOART00000027120	ENSOART00000027120	ensembl:	-		4:6168807-6173179	4156	1.21437596798129	1.41594885692753	2.02522235066312	1.44827671031059	1.22070124335801	1.53381973282381	1.3805149175957	1.7878079807749	1.5916951687857	71	60	77	62	57	71	63	70	60
ENSOART00000027121	ENSOART00000027121	ensembl:	-		4:7868799-7870786	477	1.04321583725172	1.64480222709584	2.29172409990017	0	1.30604182809841	0.941113314015104	0.38186814626337	1.11262802756821	1.38683572586723	7	8	10	0	7	5	2	5	6
ENSOART00000027122	ENSOART00000027122	ensembl:	-		4:8837314-8955083	961	0.147954704779367	0	0.682433474153567	0	0	0	0.0947716471215545	0	0	2	0	6	0	0	0	1	0	0
ENSOART00000027123	ENSOART00000027123	ensembl:	-		4:15848328-15849340	931	0.610821154521188	0.948139256693823	0.939231748888762	0.104276324591158	0.573613033421085	1.15727421999593	0.782512851270003	1.02610357085936	1.77637121707483	8	9	8	1	6	12	8	9	15
ENSOART00000027241	ENSOART00000027241	ensembl:	-		5:92868264-93003786	728	0	0	0	0	0	0.493284274948218	0	0	0	0	0	0	0	0	4	0	0	0
ENSOART00000027240	ENSOART00000027240	ensembl:	-		5:90394829-90401227	2106	0.134997888068986	0.512255402810399	0.622867324409421	0.230487317650446	0	0.341036041939509	0.302720261247244	0.352807690792995	1.46585770454912	4	11	12	5	0	8	7	7	28
ENSOART00000027246	ENSOART00000027246	ensembl:	-		5:96266710-96267956	1212	0	0.242771630358072	0	0.16020009603031	0.367161228985337	0.37038865576337	0.375724228068539	0.262734440173284	0.363872739955262	0	3	0	2	5	5	5	3	4
ENSOART00000028615	ENSOART00000028615	ensembl:	-		6:70339561-70349721	4966	0	0	0	0.0390983722087668	0	0.0542309411074105	0.0916991068101227	0.0427485758477676	0.0666049779740905	0	0	0	2	0	3	5	2	3
ENSOART00000028619	ENSOART00000028619	ensembl:	-		6:88662594-88690484	1210	0.176235546928205	0	0	0	0	0	0.150538103940188	0.0877229039917412	0	3	0	0	0	0	0	2	1	0
ENSOART00000028705	ENSOART00000028705	ensembl:	-		19:60223527-60225276	1590	0.13411635961203	0.123391887311703	0	0.427401765635582	0.111938705957681	0.169377895307799	0	0.133515363308185	0.277367145173445	3	2	0	7	2	3	0	2	4
ENSOART00000028706	ENSOART00000028706	ensembl:	-		19:60305454-60307235	1273	0.949261217760102	0.308158154880093	0.515175623457642	0	0.0699405534837406	0.352640259846979	0.214632096348344	0.416907752670883	0.173218287834163	17	4	6	0	1	5	3	5	2
ENSOART00000028700	ENSOART00000028700	ensembl:	-		19:59617360-59650468	3309	0.0644439443285366	0.355683549101218	0.264256499914003	0.17603129319015	0.0806941272461514	0.244189181912211	0.082570764173902	0.0962327414596617	0.099957788038481	3	12	8	6	3	9	3	3	3
ENSOART00000028802	ENSOART00000028802	ensembl:	-		22:49894248-49912921	4279	0.0498352446326543	0.160440417657476	0.0510881489959942	0.0453756757159934	0	0	0.0638529232651184	0	0	3	7	2	2	0	0	3	0	0
ENSOART00000028803	ENSOART00000028803	ensembl:	-		22:49957766-49966847	3611	0.216538218399987	0.16296827249736	0.151347403457394	0.48392762323418	0.24646879508736	0.0994491698040162	0.1765518887252	0.176368951254512	0.0915979841094803	11	6	5	18	10	4	7	6	3
ENSOART00000028801	ENSOART00000028801	ensembl:	-		22:49878158-49925021	1585	0.134539439610806	0.928199419539379	0.344804715384636	0.245000020679793	0.673859601406978	0.566449275438744	0.229843666583757	0.602714463388052	0.626044770888328	3	15	5	4	12	10	4	9	9
ENSOART00000028807	ENSOART00000028807	ensembl:	-		22:50019726-50141449	2378	0.149465720385239	0.659899997955547	0.367714364262169	0.285773257931277	0.112286319199964	0.30202771418192	0	0.223180643040384	0.0463639361675545	5	16	8	7	3	8	0	5	1
ENSOART00000028891	ENSOART00000028891	ensembl:	-		20:6823680-6926138	1436	0.841510814908502	1.50259096596536	1.14182999271381	0.811263996053214	0.68177795518472	0.937836457072155	0.697594793303492	1.03483704291093	0.921337940443826	17	22	15	12	11	15	11	14	12
ENSOART00000028890	ENSOART00000028890	ensembl:	-		20:5793328-5877325	294	0.241702518674001	0	0.74355846787027	0.660416722410667	0	0.610885024645592	0.619561584243632	0.722072883197325	0	1	0	2	2	0	2	2	2	0
ENSOART00000028893	ENSOART00000028893	ensembl:	-		20:9839577-9842754	1689	0.841713760800318	0.174209127290694	0.841362747177721	0.2873927122391	0.421560850555206	0.691020103676619	0.269613833285417	0.502757673558351	0.587496128986383	20	3	13	5	8	13	5	8	9
ENSOART00000028892	ENSOART00000028892	ensembl:	-		20:7198200-7388197	4911	0.0144696681918461	0.0399497252750168	0.0222567898140765	0.0395362485010662	0.0181295712858485	0.036571003308044	0.01854521541108	0.0216136660211783	0.0673509103276998	1	2	1	2	1	2	1	1	3
ENSOART00000028894	ENSOART00000028894	ensembl:	-		20:9842260-9847228	4074	0.314057454761602	0.120381030147175	0.61710668329712	0.381271509845333	0.371395895375623	1.0137455954074	0.514130534916898	0.104216704791367	0.920131803392026	18	5	23	16	17	46	23	4	34
ENSOART00000028897	ENSOART00000028897	ensembl:	-		20:18753984-18754927	866	0	0	0.126216044777055	0	0.102810998365822	0.207390527997464	0	0	0	0	0	1	0	1	2	0	0	0
ENSOART00000028896	ENSOART00000028896	ensembl:	-		20:17816337-17827019	799	0.444842907479473	0.368259344172695	0.683999341532726	0.364510356174098	0.22275662387073	0.674231726418156	0.113986924760718	0.531387803904915	0.827935721199834	5	3	5	3	2	6	1	4	6
ENSOART00000027545	ENSOART00000027545	ensembl:	-		1:215729276-215814381	1147	0	0.427578305858405	0	0	0	0.0782912804035764	0	0	0.288369939511189	0	5	0	0	0	1	0	0	3
ENSOART00000027541	ENSOART00000027541	ensembl:	-		1:206843280-206845185	1324	0	0	0.247665622606336	0	0.268920839609001	0	0	0.641357787492488	0	0	0	3	0	4	0	0	8	0
ENSOART00000028791	ENSOART00000028791	ensembl:	-		22:40704642-40781301	1327	0.053549766759726	0.369579741386278	0.329474287194965	0.146316892531075	0.201218437873033	0.135343027314095	0.0686326698446224	0.239965441966858	0.166169465269698	1	5	4	2	3	2	1	3	2
ENSOART00000028421	ENSOART00000028421	ensembl:	-		25:43997372-44012571	4830	0	0	0	0	0.03684938767551	0	0.056568666387462	0	0	0	0	0	0	2	0	3	0	0
ENSOART00000028423	ENSOART00000028423	ensembl:	-		25:44982647-44988918	5104	0.0278574591091245	0.0384390871523526	0.0856607325838007	0.057061868060953	0.0523152168999833	0.0351881264196325	0.124907694002096	0.124778268608942	0.108006896753962	2	2	4	3	3	2	7	6	5
ENSOART00000028424	ENSOART00000028424	ensembl:	-		25:45185753-45192629	733	0.193976086347846	0.267657709175454	0	0	0.242813836934124	0.24502073294107	0	0.289617227367004	0.752069851340004	2	2	0	0	2	2	0	2	5
ENSOART00000028425	ENSOART00000028425	ensembl:	-		18:1049661-1059936	946	9.31750484656345	12.8557625364219	8.43510751611861	7.90196287628577	8.74984214100336	6.07404181985704	8.08650813003334	8.97629715264329	12.120757389595	124	124	73	77	93	64	84	80	104
ENSOART00000028426	ENSOART00000028426	ensembl:	-		18:1078254-1105316	2408	1.44647321829133	1.05897257404012	1.40724204063579	1.29011638796502	1.55238788708817	1.04396433034278	1.58842123982798	1.36648095046936	2.47241049843633	49	26	31	32	42	28	42	31	54
ENSOART00000027953	ENSOART00000027953	ensembl:	-		3:48316038-48318998	2234	0.127263004598605	0.263419172778857	0.195708316520913	0.173824992290722	0.239048224760533	0.28133896509893	0.326105400417356	0.190053202918544	0.345467359644186	4	6	4	4	6	7	8	4	7
ENSOART00000027955	ENSOART00000027955	ensembl:	-		3:55987273-55990094	2658	0.133720648260383	0.258286135122777	0.534635696005708	0.109572526178745	0.0669610769272811	0.168890538293907	0.171323462911614	0.319472426877372	0	5	7	13	3	2	5	5	8	0
ENSOART00000027956	ENSOART00000027956	ensembl:	-		3:57359215-57360025	758	0.0937474148946654	0.129348436897593	0.144199333478799	0	0.234805465003579	0.473761150609898	0	0	0.436359262030783	1	1	1	0	2	4	0	0	3
ENSOART00000028429	ENSOART00000028429	ensembl:	-		18:3410439-3417300	1902	0	0	0	0	0.0935765207532666	0.0472135113685079	0.0957681944098989	0.0558068947581529	0	0	0	0	0	2	1	2	1	0
ENSOART00000028229	ENSOART00000028229	ensembl:	-		13:43509630-43526341	398	0.178544071583307	0	0	0	0	0	0	0.800085782638242	0	1	0	0	0	0	0	0	3	0
ENSOART00000028916	ENSOART00000028916	ensembl:	-		20:30663147-30666822	3559	0.11983422971797	0.137800594779317	0.0614234868091766	0.300054464776074	0.175044100028924	0.0756703718851926	0.0767706262015851	0.536837552385536	0.278808924377072	6	5	2	11	7	3	3	18	9
ENSOART00000028911	ENSOART00000028911	ensembl:	-		20:28077664-28085359	2499	0	0	0	0	0.249292497800297	0	0	0	0	0	0	0	0	7	0	0	0	0
ENSOART00000027724	ENSOART00000027724	ensembl:	-		2:49498792-49506319	1117	1.5909436213678	2.72196801710672	2.74002515813529	2.95502486894227	2.39040516014168	2.00944964541273	2.60899532247607	2.28063843502253	1.18445951878007	25	31	28	34	30	25	32	24	12
ENSOART00000027725	ENSOART00000027725	ensembl:	-		2:49498792-49500679	1080	2.43524451129662	3.4508915020968	0.809652553903183	0.898900538836741	1.15375000990997	0.997613239644642	1.01187192228484	0.982821424351915	0.306259556129013	37	38	8	10	14	12	12	10	3
ENSOART00000028041	ENSOART00000028041	ensembl:	-		3:219874504-219876643	2051	0.0346467774208466	0.095657289529794	0.159877759303164	0	0	0.26265780078406	0	0	0.322535661257273	1	2	3	0	0	6	0	0	6
ENSOART00000027639	ENSOART00000027639	ensembl:	-		17:70371117-70478033	3438	0.103382630330453	0.142650470279113	0.127170558204688	0.112950853047549	0.0776663371313307	0.208906894800641	0.0794725592354397	0.0926219143368297	0.288621571221059	5	5	4	4	3	8	3	3	9
ENSOART00000027634	ENSOART00000027634	ensembl:	-		17:68081737-68124857	2001	0.390764371135609	0.441138254863543	0.327745411624977	0.0485163709117281	0.133441712672421	0.0897552210123959	0.0910300378648814	0.47741250598204	0.550991705179633	11	9	6	1	3	2	2	9	10
ENSOART00000027636	ENSOART00000027636	ensembl:	-		17:69057571-69061534	3703	0.038397102698615	0.211874334951314	0.147587219520564	0.104867683709822	0.144216509347834	0.193956765953175	0.0737852170271244	0.0286645189927105	0.0893222577962013	2	8	5	4	6	8	3	1	3
ENSOART00000027637	ENSOART00000027637	ensembl:	-		17:69413175-69414609	874	2.03327691655359	5.27423394765045	3.37677918405056	1.77723127129278	3.15688431174263	5.03353593733312	1.87560067891363	1.82170561493147	3.15370252306764	25	47	27	16	31	49	18	15	25
ENSOART00000027631	ENSOART00000027631	ensembl:	-		17:66974821-66976941	823	0.604634209439939	0.595908039877996	0.66405282367515	1.06164194866259	1.0814080426008	1.09091385367	0.663977299274463	0.773837524884619	0.535861191768868	7	5	5	9	10	10	6	6	4
ENSOART00000027632	ENSOART00000027632	ensembl:	-		17:67098730-67119131	630	0.676968291375008	0.778463994951731	1.56147278252757	0.770486176145778	0.565160621654471	0.712557223468579	1.01195058759793	0.505451018238128	0.7000218425806	6	5	9	5	4	5	7	3	4
ENSOART00000027633	ENSOART00000027633	ensembl:	-		17:68037946-68085072	4831	0.073572652261664	0.304532411502777	0.181002847902181	0.200954788230942	0.221086207458096	0.390280335699383	0.13196623270269	0.175772657967306	0.273864889769682	5	15	8	10	12	21	7	8	12
ENSOART00000028716	ENSOART00000028716	ensembl:	-		7:9450814-9529923	558	1.91079759662301	1.40604061348516	1.37118577677152	1.56582674507045	1.11645511111638	1.12636424378317	1.79524394835809	2.09245851636214	0.790347241623258	15	8	7	9	7	7	11	11	4
ENSOART00000028717	ENSOART00000028717	ensembl:	-		7:10418948-10481314	4307	0.0495112634741415	0.0683165117237017	0.0507560226500718	0	0	0.0416996046542383	0	0.172512885258892	0.127993313450713	3	3	2	0	0	2	0	7	5
ENSOART00000028714	ENSOART00000028714	ensembl:	-		7:8239582-8395732	4038	0	0	0	0	0	0	0.0225546193372496	0.0525729142298201	0	0	0	0	0	0	0	1	2	0
ENSOART00000028998	ENSOART00000028998	ensembl:	-		14:60259415-60261145	892	0.239063914555076	0.439781761392779	0.245074203535717	0.217670982498583	0.0998142652295985	0.201345512607404	0.306307913286369	0.237992631905845	0.618012557211012	3	4	2	2	1	2	3	2	5
ENSOART00000028999	ENSOART00000028999	ensembl:	-		14:60259415-60261145	702	0.303767823052888	1.5367662084312	0.311404828424301	0.276584781180536	0	0.511554062909263	0.518949019280991	0	0.628224730521051	3	11	2	2	0	4	4	0	4
ENSOART00000028995	ENSOART00000028995	ensembl:	-		14:60169049-60212864	1141	0.436120906546074	1.54727019804023	0.574775257372111	0.680674904079705	0.624028287982246	0.629467050240671	0.478924905611642	0.465138973838768	0.676401473659169	7	18	6	8	8	8	6	5	7
ENSOART00000028996	ENSOART00000028996	ensembl:	-		14:60175227-60212864	1022	0.278185471891667	0.767681665679762	0.21390038116816	0.854923017367233	0.261268950154124	0.527114627600887	0.534690134347244	0.311579394804325	1.29456094175864	4	8	2	9	3	6	6	3	12
ENSOART00000028997	ENSOART00000028997	ensembl:	-		14:60259415-60261145	1039	0.136847421841166	0.0943658471302941	0.105200283712156	0.0934372071168123	0.0856923239507236	0.0864293538237749	0.0876569325157015	0.20432091208856	0.10611495688782	2	1	1	1	1	1	1	2	1
ENSOART00000028990	ENSOART00000028990	ensembl:	-		14:59279019-59284165	979	0.145234393557683	0.300550782424906	0.111647696401358	0.0991636958063003	0	0.183452704030443	0.0930291653562961	0.108421566731366	0.112618427177165	2	3	1	1	0	2	1	1	1
ENSOART00000028991	ENSOART00000028991	ensembl:	-		14:59293393-59294874	1331	0.32042826714219	0.515796053460813	0.574847230231786	0.510570103201034	0.20061372431068	0.674547033486408	0.342132054409519	0.23924428361384	0.662680331819351	6	7	7	7	3	10	5	3	8
ENSOART00000028992	ENSOART00000028992	ensembl:	-		14:59424260-59580894	2284	0.342346544064078	0.601159848648285	0.574325124871384	0.297534504098326	0.194833366694496	0.117911932372767	0.119626382947216	0.4647316717601	0.53099292568778	11	14	12	7	5	3	3	10	11
ENSOART00000027468	ENSOART00000027468	ensembl:	-		1:80922455-80924360	1290	20.4984615226623	13.5331444781845	23.6413838457439	29.8770162813459	20.5604769842664	13.3628920036855	31.8391012681533	24.1912074397672	17.1788363563323	372	178	279	397	298	192	451	294	201
ENSOART00000027460	ENSOART00000027460	ensembl:	-		1:65619140-65732215	5294	0.0268576636367532	0	0	0	0.0504376401695344	0	0.0344070845802092	0	0	2	0	0	0	3	0	2	0	0
ENSOART00000027463	ENSOART00000027463	ensembl:	-		1:72035272-72059706	3146	0	0.0311653258640736	0.034743513915108	0	0	0.0570884288766065	0	0	0	0	1	1	0	0	2	0	0	0
ENSOART00000028500	ENSOART00000028500	ensembl:	-		9:8584-16683	5252	0	0	0	0	0	0	0	0.0404206831035822	0.0629779742230262	0	0	0	0	0	0	0	2	3
ENSOART00000028509	ENSOART00000028509	ensembl:	-		9:13638565-13655514	452	8.17777106510762	23.0004799424338	10.8824826564779	11.1686403232459	13.5867604622324	13.9043245818426	5.23848331394443	14.3248396982974	13.9033734532169	52	106	45	52	69	70	26	61	57
ENSOART00000028508	ENSOART00000028508	ensembl:	-		9:13128940-13142508	4719	0	0	0	0	0	0	0.173679808734093	0.067479156916724	0.0700911889424314	0	0	0	0	0	0	9	3	3
ENSOART00000027854	ENSOART00000027854	ensembl:	-		24:29711793-29843090	694	0.409662179068133	0.706674808097393	0.944983528330804	0.419659617554905	0.256458994917454	1.29369178900635	0.262465570270357	1.07062391471188	0.635466514158182	4	5	6	3	2	10	2	7	4
ENSOART00000027856	ENSOART00000027856	ensembl:	-		24:31053456-31074351	1926	0.0368954000468102	0.101865576752652	0.0567513472362044	0	0	0.0466251810087757	0	0.0551114817393597	0.171734330539633	1	2	1	0	0	1	0	1	3
ENSOART00000027853	ENSOART00000027853	ensembl:	-		24:29309747-29489513	3589	0.13864975045112	0.13664873692382	0.0304550278007606	0.135248339641081	0	0.050041849330121	0.0761289101842969	0.17745006491503	0	7	5	1	5	0	2	3	6	0
ENSOART00000027859	ENSOART00000027859	ensembl:	-		24:34830626-34857935	2638	0.377242046408446	0.334616242601194	0.165736307470705	0.404811918172118	0.573565912721868	0.816813933018621	0.793998407601002	0.804736268612637	0.62691493673111	14	9	4	11	17	24	23	20	15
ENSOART00000028226	ENSOART00000028226	ensembl:	-		13:41135501-41273769	2031	0.48998745368069	1.44869093522943	0.269086890145076	0.382397865856693	0.613515514870888	0.574659259039788	0.224213571845923	0.470360622584964	0.597138277829094	14	30	5	8	14	13	5	9	11
ENSOART00000028224	ENSOART00000028224	ensembl:	-		13:41054740-41057519	1274	0.557974070763107	0.615832544995853	1.02963782198292	0.914423154107077	0.978061232890717	1.55042731584507	0.92927568991479	1.99958644577721	2.16352904643729	10	8	12	12	14	22	13	24	25
ENSOART00000028221	ENSOART00000028221	ensembl:	-		13:40275072-40320721	2301	0.0308824600131058	0.17048471584631	0	0.253145392944897	0	0	0.0395808574027874	0.184519276540646	0.0958308910964316	1	4	0	6	0	0	1	4	2
ENSOART00000028075	ENSOART00000028075	ensembl:	-		21:6805482-6809351	1322	7.04380495378626	5.04482156710705	10.997096626712	9.03252250976344	9.69475430557727	10.119161440948	10.8153761413308	10.5182066891139	7.0054218505507	131	68	133	123	144	149	157	131	84
ENSOART00000028073	ENSOART00000028073	ensembl:	-		21:637865-671799	1470	0.580258535464293	0.0666980375295072	0.074355846787027	0.330208361205333	0.544932381750031	0.488586329472521	0.247824633697453	0.57765830655786	0.300009361105972	12	1	1	5	9	8	4	8	4
ENSOART00000028071	ENSOART00000028071	ensembl:	-		3:223888905-223903339	1543	0.138201563048041	1.01700725543635	0.566704315110458	0.377503272304736	0.576797679235552	0.814603404881861	0.177074957000286	0.550329041244365	0.357269734952834	3	16	8	6	10	14	3	8	5
ENSOART00000029069	ENSOART00000029069	ensembl:	-		8:23042588-23172457	1385	0	0	0.23675760601501	0	0	0	0	0	0.0796053719902127	0	0	3	0	0	0	0	0	1
ENSOART00000028334	ENSOART00000028334	ensembl:	-		10:81369406-81392785	5257	0	0	0	0.0738681820006604	0.101585264241018	0.034164009367663	0.0173246248590097	0.121146715423253	0	0	0	0	4	6	2	1	6	0
ENSOART00000028332	ENSOART00000028332	ensembl:	-		10:81079684-81214260	1126	0	0.174238988299829	0	0	0	0	0	0.188534127584382	0	0	2	0	0	0	0	0	2	0
ENSOART00000028333	ENSOART00000028333	ensembl:	-		10:81150218-81227144	629	0	0	0	0	0	0	0.434382605169223	0	0.350567377444975	0	0	0	0	0	0	3	0	2
ENSOART00000028132	ENSOART00000028132	ensembl:	-		23:330330-331108	647	0.549350051122255	0.606314267638885	0	0	0	0.138794588288875	0.422297772258797	0.328113489428151	0	5	4	0	0	0	1	3	2	0
ENSOART00000028133	ENSOART00000028133	ensembl:	-		23:657340-807916	3238	0.0439112017581752	0.363482663365019	0.0675127206775353	0.0599637172293811	0.0549668136110911	0.110905173614053	0.0843813028571469	0.0983428478968563	0.238349006005285	2	12	2	2	2	4	3	3	7
ENSOART00000028134	ENSOART00000028134	ensembl:	-		23:1028622-1062903	1313	0	0	0	0.517569541021002	0	0	0	0	0	0	0	0	7	0	0	0	0	0
ENSOART00000027375	ENSOART00000027375	ensembl:	-		12:48573125-48625091	662	2.04017220770632	5.18538309104315	2.14661885193833	2.19972639413221	1.07555328789689	2.71245347906468	1.65078803031364	1.4430550218581	2.1650977684045	19	35	13	15	8	20	12	9	13
ENSOART00000027371	ENSOART00000027371	ensembl:	-		12:43458472-43471060	945	0.15045975798198	0	0	0	0	0.190053118778629	0	0	0	2	0	0	0	0	2	0	0	0
ENSOART00000027370	ENSOART00000027370	ensembl:	-		12:41312990-41316656	3499	0.284413980687477	0.560596606544913	0.0937151427067131	0.0554908592136999	0.12717902530158	0.461858818489573	0.0520580468041234	0	0.220569900384427	14	20	3	2	5	18	2	0	7
ENSOART00000027844	ENSOART00000027844	ensembl:	-		24:10232183-10300719	4082	0.121904447420154	0	0	0	0.0654132452370198	0	0.0223115024213165	0.0780093438241109	0.0270096619810006	7	0	0	0	3	0	1	3	1
ENSOART00000027173	ENSOART00000027173	ensembl:	-		4:113091309-113093882	2519	0.0564448079765666	0.311461160113028	0	0	0	0.427718260744825	0	0	0.175074934825636	2	8	0	0	0	12	0	0	4
ENSOART00000027172	ENSOART00000027172	ensembl:	-		4:113085240-113104158	4473	0.0794610961493626	0.570088521861975	0.195489550238193	0.173630687582147	0.179085759260573	0.321156550632353	0.0610835364747242	0.18984075802371	0.147891938573366	5	26	8	8	9	16	3	8	6
ENSOART00000027170	ENSOART00000027170	ensembl:	-		4:112000112-112124900	714	0.0995245665128241	0.54941923131983	0.612342267657869	0.135968148731608	0.249275269569626	0.754497408134603	0.127556796756042	0.297324128375369	0.617666331688765	1	4	4	1	2	6	1	2	4
ENSOART00000027177	ENSOART00000027177	ensembl:	-		4:113596978-113732486	3384	0.063015665420546	0.0289734382885271	0.0968999067171362	0	0	0.0265366721698883	0.0538271589147836	0.156833206013603	0	3	1	3	0	0	1	2	5	0
ENSOART00000027176	ENSOART00000027176	ensembl:	-		4:113208235-113213701	5249	0.311468766198298	0.84082441787405	1.02042598356236	0.425389395784047	0.389998211445098	0.496030902283926	0.329653371357273	0.687544345631593	0.903177107632653	23	45	49	23	23	29	19	34	43
ENSOART00000027174	ENSOART00000027174	ensembl:	-		4:113111152-113112925	1203	1.71354079579478	0.326089219586333	0.636011357804246	0.564895101712864	1.62765277414008	3.05992394422655	0.681292616306057	1.23526682761438	1.28308242966768	29	4	7	7	22	41	9	14	14
ENSOART00000027179	ENSOART00000027179	ensembl:	-		4:116582528-116590679	5264	0.0540094134257758	0.279482537988206	0.0622927971753019	0.0922124412940425	0.0338112732660929	0.0341185785041421	0	0	0	4	15	3	5	2	2	0	0	0
ENSOART00000027178	ENSOART00000027178	ensembl:	-		4:114195696-114243135	5044	0.197296692788557	0.194441665969533	0.108349618137321	0.0769875164110769	0.123509506741265	0.195801387825795	0.0361124317540895	0.0631312730947701	0.109291673479822	14	10	5	4	7	11	2	3	5
ENSOART00000027580	ENSOART00000027580	ensembl:	-		1:263400448-263418759	2547	0.223272279096673	0.308037166205229	0.171657785279827	0.152463695633087	0.24459440596896	0.211508107345154	0.107273913879639	0.166697626745201	0.216437848854426	8	8	4	4	7	6	3	4	5
ENSOART00000027587	ENSOART00000027587	ensembl:	-		17:3621722-3719234	824	0	0.47607443102228	0.132649386865206	0.353451182746485	0	0.21796140442452	0.331585750790584	0.386449200837404	0.802816312182848	0	4	1	3	0	2	3	3	6
ENSOART00000027584	ENSOART00000027584	ensembl:	-		1:269392468-269440315	4425	0.128514010137678	0.110832161993128	0.123506321781841	0.0877570695542309	0.140786881808574	0.142036440232996	0.102910229247247	0.0959500238011361	0.0747480950552166	8	5	5	4	7	7	5	4	3
ENSOART00000027585	ENSOART00000027585	ensembl:	-		1:270928864-271050083	926	0	0.529624532202581	0.826265295289965	1.25807246040218	1.1534205920411	0.58176150044072	0.885091811464564	1.03164408690071	0.833449332014159	0	5	7	12	12	6	9	9	7
ENSOART00000028921	ENSOART00000028921	ensembl:	-		20:35382426-35386180	1282	1.71885651219508	5.27870532518245	4.6043147126392	5.7552071940499	6.31769268035849	6.23291639275412	4.33328306689555	2.98066279085823	4.3859626830073	31	69	54	76	91	89	61	36	51
ENSOART00000027706	ENSOART00000027706	ensembl:	-		2:24940665-24945597	4489	0	0	0.0730472898932477	0.0648794329657171	0.0594824831939218	0	0	0	0.098243208025346	0	0	3	3	3	0	0	0	4
ENSOART00000027707	ENSOART00000027707	ensembl:	-		2:25258013-25350946	2301	0	0	0.190009725818218	0	0	0	0	0	0	0	0	4	0	0	0	0	0	0
ENSOART00000027709	ENSOART00000027709	ensembl:	-		2:27154702-27308031	3311	0.171753094188833	0.148122113204346	0.264096876537432	0.205245788994435	0.134400304901911	0.135581712710723	0.165041775083927	0.192349224699499	0.366290499024733	8	5	8	7	5	5	6	6	11
ENSOART00000028530	ENSOART00000028530	ensembl:	-		9:26378604-26419029	3217	0.0220890707150004	0	0.0339767158150232	0	0.0553256271286022	0	0.0566214192625514	0.131979749866344	0	1	0	1	0	2	0	2	4	0
ENSOART00000028623	ENSOART00000028623	ensembl:	-		6:91393630-91434054	442	0	0	0.741876208893188	0	0	0	0	0	1.49665303447662	0	0	3	0	0	0	0	0	6
ENSOART00000028868	ENSOART00000028868	ensembl:	-		15:49855712-49857599	1584	5.29537219777952	18.8229171951633	6.14178199151652	4.10634109786784	8.25977402716583	13.0931938083415	2.9896394670491	5.15981247784755	11.4845802097454	118	304	89	67	147	231	52	77	165
ENSOART00000028869	ENSOART00000028869	ensembl:	-		15:50862827-50924655	4989	0.569915631185302	1.65133219219359	1.29269331238487	1.30375712548059	1.32014735186596	0.953782593985057	0.894457249086483	1.40419946137111	1.21543754669095	40	84	59	67	74	53	49	66	55
ENSOART00000027516	ENSOART00000027516	ensembl:	-		1:163581126-163587857	2505	0.454031532821738	0.548123390943187	0.261803819824981	0.232529959746989	0.106593559703599	0.358412016594974	0.145430024564972	0.29661197477447	0.396120144454292	16	14	6	6	3	10	4	7	9
ENSOART00000028479	ENSOART00000028479	ensembl:	-		18:66848632-66853529	1713	0.12448628825635	0.229004863492328	0.191423983847513	0.113346477751743	0.259777822259328	0.262061325618917	0.106334562619748	0.18589266870404	0	3	4	3	2	5	5	2	3	0
ENSOART00000028478	ENSOART00000028478	ensembl:	-		18:66590600-66596940	624	0.455617872232827	1.25732477936653	0.350330431977339	0.466736818242154	0	0.287820828919558	0.583817646691114	0	0	4	8	2	3	0	2	4	0	0
ENSOART00000028472	ENSOART00000028472	ensembl:	-		18:59958121-60126952	2261	0.251514593038136	0	0.0966856212091373	0.171749240503084	0.078718506179882	0.15882837335794	0.0805621874248685	0.0469459150066373	0.097526262898226	8	0	2	4	2	4	2	1	2
ENSOART00000028477	ENSOART00000028477	ensembl:	-		18:66487432-66488377	767	0.185377407161631	0.511454147538929	0	0	0	0.351122364458149	0.118742572208362	0	0	2	4	0	0	0	3	1	0	0
ENSOART00000028476	ENSOART00000028476	ensembl:	-		18:66302709-66307716	3681	1.69936323095323	2.58448771692424	2.31625297042457	1.819779085958	1.93432460542633	1.95125694446163	1.90502384660771	3.02779317669884	2.27632169648912	88	97	78	69	80	80	77	105	76
ENSOART00000028475	ENSOART00000028475	ensembl:	-		18:62943201-62946368	1920	0.111065110303712	0.357564868310595	0.0569286951963175	0	0	0	0.047435183793653	0.11056741023959	0.229694667096759	3	7	1	0	0	0	1	2	4
ENSOART00000027401	ENSOART00000027401	ensembl:	-		12:78703719-78805612	2154	0.0660095038500331	0	0	0	0	0.0833798501605405	0	0	0.153556323407304	2	0	0	0	0	2	0	0	3
ENSOART00000028451	ENSOART00000028451	ensembl:	-		18:25043084-25049333	4770	0.04470545320401	0	0	0	0	0	0.0572802219395056	0	0	3	0	0	0	0	0	3	0	0
ENSOART00000028453	ENSOART00000028453	ensembl:	-		18:32955015-32956433	499	5.41320241082798	12.3824084066051	6.57181510836485	7.00385830660771	6.95617868747656	10.4355358961456	4.38004679786625	6.3814457212429	10.1634007186035	38	63	30	36	39	58	24	30	46
ENSOART00000029108	ENSOART00000029108	ensembl:	-		8:79151783-79209776	866	0.164185301723985	0	0	0	0	0	0	0	0.127313441346934	2	0	0	0	0	0	0	0	1
ENSOART00000029103	ENSOART00000029103	ensembl:	-		8:67232575-67348942	1536	1.15695574548687	1.21320404370591	0.925170364572377	0.695243385506542	0.579426314492484	0.526055991502283	0.889354384582728	1.79672041639335	1.1484733354838	25	19	13	11	10	9	15	26	16
ENSOART00000029107	ENSOART00000029107	ensembl:	-		8:77841009-77843498	2019	0	1.11726931267689	0.378960705021549	0.528922159553268	0.440811698395471	0.755984819020019	0	0.262864571149101	0	0	23	7	11	10	17	0	5	0
ENSOART00000028279	ENSOART00000028279	ensembl:	-		10:10283950-10359028	1257	0.169645991872019	0.624161226988637	0.434777624411017	0	0.141593112547902	0.142880029630711	0.144909392018797	0	0.263134702163352	3	8	5	0	2	2	2	0	3
ENSOART00000028271	ENSOART00000028271	ensembl:	-		10:8590717-8719711	1835	4.7647060784993	3.20691196152087	5.89733712388636	11.5862646019436	7.0329697637918	3.7185100056681	3.37477536970499	3.06576012697022	8.83215974306306	123	60	99	219	145	76	68	53	147
ENSOART00000028275	ENSOART00000028275	ensembl:	-		10:8982633-9090666	2937	0	0	0.0744317976009055	0.132218261075067	0.0606001166063034	0.0611509013434812	0	0	0.0750789514514433	0	0	2	4	2	2	0	0	2
ENSOART00000028274	ENSOART00000028274	ensembl:	-		10:8809479-8827730	3044	0	0.0644523984315399	0.179538591946337	0	0	0.117973374560546	0.0897590862849677	0.104610427559139	0.10865976367258	0	2	5	0	0	4	3	3	3
ENSOART00000027230	ENSOART00000027230	ensembl:	-		5:78673827-78682818	906	0.313803037829232	0.216548676407955	0.120643592469017	0	0.196448722376063	0.990973622042394	0.603149356846449	0.468630083134688	0.851847772014472	4	2	1	0	2	10	6	4	7
ENSOART00000027235	ENSOART00000027235	ensembl:	-		5:84432692-84542717	1093	3.83705680282256	2.8714404302622	6.90063982720996	7.10567306088695	5.29300150410214	3.77859062734652	6.49905611367501	6.89503630551737	4.5391432007106	59	32	69	80	65	46	78	71	45
ENSOART00000027238	ENSOART00000027238	ensembl:	-		5:90385180-90394493	2150	0.36368349146156	1.00359098936105	0.965990813323139	0.406386662208982	0.372581674963974	0.835183350298055	0.381206984844738	0.493696343395381	1.53842009590388	11	22	19	9	9	20	9	10	30
ENSOART00000027782	ENSOART00000027782	ensembl:	-		2:159475811-159552022	1432	0	0	0	0	0	0.188066238505168	0	0	0	0	0	0	0	0	3	0	0	0
ENSOART00000027783	ENSOART00000027783	ensembl:	-		2:160136348-160361056	903	1.25952269071811	0.543114415082603	1.69475611822824	1.29011638796502	1.87270146205205	0.99426589321197	1.61364771606078	1.41056098112966	1.70935566211542	16	5	14	12	19	10	16	12	14
ENSOART00000027785	ENSOART00000027785	ensembl:	-		2:161787904-161972956	1946	0.0365162078572232	0	0.0561680857024305	0	0.0457524792316556	0	0.0468014146371089	0	0	1	0	1	0	1	0	1	0	0
ENSOART00000028004	ENSOART00000028004	ensembl:	-		3:132180519-132308558	4058	0.052549288265926	0.048347240223166	0.107740852416885	0	0.0438596703974157	0.0221291519524155	0.0673303742364321	0	0.0543388073959805	3	2	4	0	2	1	3	0	2
ENSOART00000027591	ENSOART00000027591	ensembl:	-		17:12044770-12054104	3261	0	0	0	0	0	0	0.0837861572068205	0	0	0	0	0	0	0	0	3	0	0
ENSOART00000027593	ENSOART00000027593	ensembl:	-		17:12837002-12840634	2511	0	0	0.174118828796383	0.0386623887671716	0.24810113580364	0	0	0	0	0	0	4	1	7	0	0	0	0
ENSOART00000027595	ENSOART00000027595	ensembl:	-		17:17669436-17673568	4027	0.10590762939316	0.146133208837339	0.352883456663315	0.0723227649821465	0.176810597613048	0.0668762983708469	0.0678486860321434	0.052716520402288	0.191649883646663	6	6	13	3	8	3	3	2	7
ENSOART00000027594	ENSOART00000027594	ensembl:	-		17:16033122-16185075	2187	0	0	0	0	0	0	0.166576228411182	0	0	0	0	0	0	0	0	4	0	0
ENSOART00000028749	ENSOART00000028749	ensembl:	-		7:78429629-78430923	643	11.9393632894721	35.9972732899271	19.0399304857148	15.7021008588091	18.2713589897978	23.0389808334553	13.0302350141245	21.4602247732171	23.8335701506519	108	236	112	104	132	165	92	130	139
ENSOART00000028748	ENSOART00000028748	ensembl:	-		7:78022977-78024721	1455	0	0	0.0751224019085427	0	0.0611919756596576	0	0	0.291806773415826	0.0757755602793433	0	0	1	0	1	0	0	4	1
ENSOART00000028740	ENSOART00000028740	ensembl:	-		7:61009864-61035664	1424	0	0	0	0	0	0	0	0	0.309700674737204	0	0	0	0	0	0	0	0	4
ENSOART00000028743	ENSOART00000028743	ensembl:	-		7:61937799-62039205	2215	0.385092572068854	0.664196875832919	0.296080617905904	0.21914505235749	0.16074545898073	0.324253681410657	0.164470524395149	0.239604320158029	0.099551639012591	12	15	6	5	4	8	4	5	2
ENSOART00000027920	ENSOART00000027920	ensembl:	-		3:2690045-2693980	2586	21.440461817548	39.8984130185651	24.5586780749763	25.1150244515871	28.3255404708852	33.3992045875276	20.425530677141	21.8775977050374	25.7510083361895	780	1052	581	669	823	962	580	533	604
ENSOART00000027921	ENSOART00000027921	ensembl:	-		3:2878616-2887333	716	0.297828228747385	0.41094862568992	0.763289767995319	0.677941747167374	0.621507555209816	1.12852235048535	0.127200492854489	0.592987228100597	0.615941006739914	3	3	5	5	5	9	1	4	4
ENSOART00000027922	ENSOART00000027922	ensembl:	-		3:2917466-2923957	6251	0.557208048255562	1.34933441172283	0.66449536030867	0.388262910711758	0.654967401015939	0.89048846014061	0.422495779324	0.628276181684571	0.723127460814415	49	86	38	25	46	62	29	37	41
ENSOART00000027923	ENSOART00000027923	ensembl:	-		3:3005589-3006413	441	0	0.444882314797296	0.495705645246847	0	0	0.610682207572337	0	0	0	0	2	2	0	0	3	0	0	0
ENSOART00000027924	ENSOART00000027924	ensembl:	-		3:3228239-3230594	1251	0	0	0	0	0	0	0.145604401093228	0	0.0881322463680612	0	0	0	0	0	0	2	0	1
ENSOART00000027925	ENSOART00000027925	ensembl:	-		3:3245487-3331990	5343	0.053210846392155	0.146840850144997	0.0409145030046527	0.0181698031432469	0.0999501654716507	0.134422965436011	0.119320394944169	0.0794645059554609	0.0825404755429119	4	8	2	1	6	8	7	4	4
ENSOART00000027927	ENSOART00000027927	ensembl:	-		3:3564482-3676554	5256	0.02705184004813	0.31721619298072	0.103979351956744	0.240117267223513	0.0677418553352962	0.153733257790622	0.0693116840820501	0.0403899215487088	0.251720183119736	2	17	5	13	4	9	4	2	12
ENSOART00000027929	ENSOART00000027929	ensembl:	-		3:9450973-9525539	776	0	0.379174247414927	0.281709007157035	0	0	0	0	0	0.142079175523769	0	3	2	0	0	0	0	0	1
ENSOART00000028944	ENSOART00000028944	ensembl:	-		14:11828068-11908807	2077	0	0.0944598463291321	0.10525093382468	0.0934821937355493	0	0	0	0	0	0	2	2	2	0	0	0	0	0
ENSOART00000028943	ENSOART00000028943	ensembl:	-		14:11341801-11344111	1350	0	0.217954974810358	0	0	0	0	0	0	0	0	3	0	0	0	0	0	0	0
ENSOART00000028942	ENSOART00000028942	ensembl:	-		14:11004860-11042730	3299	2.02541560372994	5.76750487177819	4.14174463001356	1.4713740253769	2.58998712714359	3.53794705074729	1.51828298710434	3.57143830445846	4.07719827928451	94	194	125	50	96	130	55	111	122
ENSOART00000028941	ENSOART00000028941	ensembl:	-		14:9763082-9919673	3630	0.13708373398597	0.378250439204596	0.481810183006601	0.267441482629113	0.34326446575834	0.222595593098487	0.150538103940188	0.380132583964212	0.242982788333762	7	14	16	10	14	9	6	13	8
ENSOART00000028940	ENSOART00000028940	ensembl:	-		14:7563372-7727558	5748	0.0865716691665049	0.136494548073194	0.190179609542864	0.18578528882012	0.123872003581723	0.0780986518415457	0.0792236890081888	0.147730986541415	0.153449464448775	7	8	10	11	8	5	5	8	8
ENSOART00000027415	ENSOART00000027415	ensembl:	-		1:967722-968777	828	0	0	0	0.468991585480039	0.430013516476228	0.542163104813049	0	0.256388197657021	0.266312657503489	0	0	0	4	4	5	0	2	2
ENSOART00000027416	ENSOART00000027416	ensembl:	-		1:1039061-1164690	1812	0.0392166338245896	0.27065801148984	0.180965388703526	0	0.0491359407200893	0	0.100524892807742	0.175736281175508	0.182538808288815	1	5	3	0	1	0	2	3	3
ENSOART00000027417	ENSOART00000027417	ensembl:	-		1:1045642-1161882	1160	0.30640472678974	0.59183150616926	0.376907223368723	0.334762959290924	0	0.232164528913276	0	0.183008127293115	0.475230345717433	5	7	4	4	0	3	0	2	5
ENSOART00000027410	ENSOART00000027410	ensembl:	-		1:485106-684294	1635	0.826051377065187	2.15949218436632	1.00285496607769	0.890653744902459	0.762110098289158	1.15317694297475	0.835503568635517	0.584282828422056	0.674332967623514	19	36	15	15	14	21	15	9	10
ENSOART00000027411	ENSOART00000027411	ensembl:	-		1:522174-679187	1640	0.736835079395493	0.956854997035543	0.133296457045036	0.177587667428722	0.108525940532142	0.437940185563784	0.277669368548213	0.323611932408557	0.470593952100678	17	16	2	3	2	8	5	5	7
ENSOART00000027413	ENSOART00000027413	ensembl:	-		1:891736-948267	539	0	0.727802098631463	1.01394336527764	0.720454606266182	0.330208798650674	0.999464099087397	0.337942682314708	0.590786904434175	1.22731102270625	0	4	5	4	2	6	2	3	6
ENSOART00000027418	ENSOART00000027418	ensembl:	-		1:1970371-2157301	894	0	0.438797909577582	0.122262969549138	0	0	0	0	0.356190314865795	0.246651991513299	0	4	1	0	0	0	0	3	2
ENSOART00000028538	ENSOART00000028538	ensembl:	-		9:37917875-38082193	1323	0.0537116708164447	0.296511966109115	0	0	0	0.0678761138495103	0	0.240690961065775	0	1	4	0	0	0	1	0	3	0
ENSOART00000028534	ENSOART00000028534	ensembl:	-		9:32671514-32718300	1031	0	0.190293987221734	0	0	0.17263098202979	0	0	0	0.320815053946977	0	2	0	0	2	0	0	0	3
ENSOART00000029120	ENSOART00000029120	ensembl:	-		8:90488039-90493525	5388	0.11873330277457	0.16383029843763	0.344891250759259	0.0360361017796466	0.115623970304926	0.266617158681981	0.0676136250065433	0.256102687414642	0.184164989208983	9	9	17	2	7	16	4	13	9
ENSOART00000029121	ENSOART00000029121	ensembl:	-		8:90495296-90500901	2633	0.431959358039671	0.55875278388527	0.415173716540973	0.368709677912526	0.236605374858694	0.170494132466846	0.172950157394253	0.120939666346381	0.209368477414441	16	15	10	10	7	5	5	3	5
ENSOART00000028047	ENSOART00000028047	ensembl:	-		3:220536741-220562808	1559	31.9168394495827	90.5909513855047	38.9138804296379	17.0001176953576	32.4842622980029	50.7363477563568	16.2979249790631	31.7278127693	47.8772345686058	700	1440	555	273	569	881	279	466	677
ENSOART00000028042	ENSOART00000028042	ensembl:	-		3:220210402-220211969	1390	2.96607377337762	4.86856131430496	3.14558754449162	1.81590842665724	2.24106616791977	3.03582708943356	1.57240528930594	2.51998241466923	4.04518284864414	58	69	40	26	35	47	24	33	51
ENSOART00000028043	ENSOART00000028043	ensembl:	-		3:220399814-220402100	1575	0.45133902612838	1.05859575257566	0.416392742007351	0	0.56507861527648	0.798052732528706	0.173477243588217	0.471754283688919	1.4000436851612	10	17	6	0	10	14	3	7	20
ENSOART00000028048	ENSOART00000028048	ensembl:	-		3:220536741-220543882	5729	0.942976543147786	2.99590105792703	0.877672413249247	0.864224850394967	0.683563025760348	1.53580394806394	0.619949674786931	1.25987790896151	1.67427614017234	76	175	46	51	44	98	39	68	87
ENSOART00000028049	ENSOART00000028049	ensembl:	-		3:220872828-220966136	2530	0.028087170154212	0.232600170746232	0.172811217038624	0.0767440776240063	0.175889094675979	0.106446977683558	0	0.0419544323438762	0	1	6	4	2	5	3	0	1	0
ENSOART00000027425	ENSOART00000027425	ensembl:	-		1:5382033-5386867	4767	0.089467175071587	0.246896761899713	0.114645578746517	0.122191640269815	0.0560136075220296	0.282511674502961	0.114632539816002	0.200399082120844	0.2312847497513	6	12	5	6	3	15	6	9	10
ENSOART00000027427	ENSOART00000027427	ensembl:	-		1:5546396-5582498	4751	0	0	0	0.0204338577550764	0	0.0378026093971383	0.0383395297342933	0	0	0	0	0	1	0	2	2	0	0
ENSOART00000029058	ENSOART00000029058	ensembl:	-		16:71357625-71364699	1643	9.7777338807673	18.7439224590925	8.11668061478024	6.79509719558875	6.71726570532699	6.12023972744431	9.5891972893744	9.10926133981052	6.91173648834478	226	314	122	115	124	112	173	141	103
ENSOART00000029059	ENSOART00000029059	ensembl:	-		16:71358943-71362737	533	0.800168899749072	1.2880385500119	1.23042883426187	0.364282394725583	1.16882167355148	1.51598874849439	0.341746915136262	0.995729022795561	0.620563453319575	6	7	6	2	7	9	2	5	3
ENSOART00000029056	ENSOART00000029056	ensembl:	-		16:71343670-71362737	4457	0	0.0880155555670537	0.0735717487841124	0.0871269986038752	0	0.0604242435583129	0	0.095261129755447	0.0742114248641089	0	4	3	4	0	3	0	4	3
ENSOART00000029057	ENSOART00000029057	ensembl:	-		16:71345052-71346827	1386	0.256442628482034	0.495327956101257	0.394311308719083	0.140088395662869	0.128414532808595	0.518197622167825	0.0657110771167488	0.0765834876118375	0	5	7	5	2	2	8	1	1	0
ENSOART00000029054	ENSOART00000029054	ensembl:	-		16:71256097-71289440	1710	1.74590266390435	7.22675114636299	4.47467978123826	1.75995263393299	3.43520401279038	5.25042164661058	1.06516146148429	2.91742780702358	3.73951943921665	42	126	70	31	66	100	20	47	58
ENSOART00000029055	ENSOART00000029055	ensembl:	-		16:71256097-71289440	4723	0.0301046943241523	0.0830585075507852	0.208284533769292	0.0205549985590447	0	0.0380267197217455	0.0385668231563895	0	0.11671971226598	2	4	9	1	0	2	2	0	5
ENSOART00000029052	ENSOART00000029052	ensembl:	-		16:70982405-70983690	926	0.383833135071381	4.13067919809171	2.00677544178282	0	0	2.61787845698902	0.885091811464564	0	1.42877028345284	5	39	17	0	0	27	9	0	12
ENSOART00000029053	ENSOART00000029053	ensembl:	-		16:71180514-71184442	2592	0.0548551200975969	0.0756917827259288	0.210847019245621	0	0.171681870960736	0	0	0	0.0850720989247257	2	2	5	0	5	0	0	0	2
ENSOART00000029050	ENSOART00000029050	ensembl:	-		16:70842533-70846169	2700	3.63315707528685	4.39530079387449	1.8622908353722	1.1865487112645	0.92300000792798	1.46311087349776	1.28170967924834	2.20151999054829	2.32752770402001	138	121	46	33	28	44	38	56	57
ENSOART00000029051	ENSOART00000029051	ensembl:	-		16:70982405-71011669	2020	0.140745322907566	0.388401317982533	0.595274995262036	0.865080518563675	0.969339746183424	0.311144182193569	0.0901738147364494	1.47131286497039	0.491228198939604	4	8	11	18	22	7	2	28	9
ENSOART00000027669	ENSOART00000027669	ensembl:	-		17:71765828-71768542	2630	0.135144290143003	0.372913978384154	0.124680336247448	0.073826051858835	0.101527325877382	0.102399564083422	0.103888463365567	0.484310481353643	0.293450221081792	5	10	3	2	3	3	3	12	7
ENSOART00000027668	ENSOART00000027668	ensembl:	-		17:71761047-71762798	997	1.92504362724253	5.50882371889628	2.30239361905578	1.07110716162292	2.23177848981748	2.52143039866141	0.822061201019244	2.76806675985976	3.09638548222713	27	56	21	11	25	28	9	26	28
ENSOART00000027667	ENSOART00000027667	ensembl:	-		17:71695823-71831732	1032	0.206632763355744	0.380121444924766	0.105913851528033	0	0.0862735703341103	0.434991328280237	0	0	0	3	4	1	0	1	5	0	0	0
ENSOART00000027666	ENSOART00000027666	ensembl:	-		17:71695522-71850950	1624	0.131308504792566	0.301990342869206	0.0673048613158434	0.119558199746759	0.164419253114233	0.221127433597477	0.0560810054703287	0.261440181847307	0.0678900493882048	3	5	1	2	3	4	1	4	1
ENSOART00000027665	ENSOART00000027665	ensembl:	-		17:71692284-71794016	1335	0.159734091223317	0.440807814223195	0.163749954721992	0.0727200435912869	0.133320256533868	0.268996967911837	0.0682213879279504	0.0795091489363347	0.247760539789763	3	6	2	1	2	4	1	1	3
ENSOART00000027664	ENSOART00000027664	ensembl:	-		17:71661882-71663507	857	0.0829177835357717	0.572266414025193	0	0.339841043854264	0	0.523816862059749	0	0.123856142158701	0.257300910633476	1	5	0	3	0	5	0	1	2
ENSOART00000027663	ENSOART00000027663	ensembl:	-		17:71659505-71663507	1652	0.430302037622396	1.12801538204133	0.0661641009545579	0.411361263535458	0.37710771913011	0.326096337414108	0	0.0642522480811179	0.467175594095104	10	19	1	7	7	6	0	1	7
ENSOART00000027662	ENSOART00000027662	ensembl:	-		17:71621658-71642698	1807	0.236021042372028	0.814164958478094	0.181466123038622	0.107450202760784	0	0.0496956826911467	0.100803046910696	0.176222546480366	0.244058528403862	6	15	3	2	0	1	2	3	4
ENSOART00000027661	ENSOART00000027661	ensembl:	-		17:71611707-71713012	690	2.67847038486666	7.10698379094438	3.80202278627449	3.09534446416825	3.86968487518588	4.94447566526932	1.97978019524503	3.84582296485532	3.19575189004187	26	50	24	22	30	38	15	25	20
ENSOART00000027660	ENSOART00000027660	ensembl:	-		17:71560277-71561805	1434	6.74151996651432	22.296528217758	14.3306808207069	7.98855541627296	12.7236755585853	13.9619226555707	7.81138659544342	12.361421855571	14.6080272366791	136	326	188	118	205	223	123	167	190
ENSOART00000027806	ENSOART00000027806	ensembl:	-		2:207131480-207134257	2430	0	0	0	0.59926702589116	1.06219520411125	0	0	0	1.45189715498199	0	0	0	15	29	0	0	0	32
ENSOART00000027805	ENSOART00000027805	ensembl:	-		2:207131480-207134257	2533	0.16837347949714	0	0	0	0.77302261637999	0.141772977561114	0	0	0.783482796571655	6	0	0	0	22	4	0	0	18
ENSOART00000027804	ENSOART00000027804	ensembl:	-		2:207131480-207134257	2691	0.766031058097778	2.5512624349837	1.78728319061727	1.11836454999086	0.628409297745448	0.834097084327768	3.95955407621743	1.41999617163889	0.901365917704117	29	70	44	31	19	25	117	36	22
ENSOART00000027803	ENSOART00000027803	ensembl:	-		2:203865597-203866807	1098	0.258930375476579	0.178682241189078	0.0995474451520307	0	0.24318476052597	0.163570307145541	0.248840308425721	0.0966709597723195	0	4	2	1	0	3	2	3	1	0
ENSOART00000027306	ENSOART00000027306	ensembl:	-		X:96959056-97099352	2185	0.097594971067793	0	0.100048599338151	0	0.122204515815796	0.164352838518216	0.0416821752328667	0	0.100918480738164	3	0	2	0	3	4	1	0	2
ENSOART00000027301	ENSOART00000027301	ensembl:	-		X:93783165-93784526	928	14.7068940794003	8.45496872380544	9.42320406647275	6.38141891148324	7.19315674896993	6.86913233794803	8.04707498409904	6.63404461437543	4.03945793859818	192	80	80	61	75	71	82	58	34
ENSOART00000027302	ENSOART00000027302	ensembl:	-		X:94519476-94522584	538	0.924933000686004	0.911584232006674	0.812662414698362	0.54134530591655	0.827136448940944	0.834407157593317	1.52341081304124	1.77565506407075	1.22959226996035	7	5	4	3	5	5	9	9	6
ENSOART00000027303	ENSOART00000027303	ensembl:	-		X:95048211-95091794	3797	0.149769421874961	0.0774925509597005	0.115146794603034	0.0511357693939257	0.0937717123103283	0.0945775486337379	0.0719585616674853	0.0559097781564429	0.0871109614483365	8	3	4	2	4	4	3	2	3
ENSOART00000027308	ENSOART00000027308	ensembl:	-		X:102012556-102104798	2333	0	0.0840947710354082	0	0	0.0762891309355821	0.115435428006601	0	0.318479638581246	0.094516451098538	0	2	0	0	2	3	0	7	2
ENSOART00000027309	ENSOART00000027309	ensembl:	-		X:102512476-102538639	829	0	0	0.263698660499227	0	0	0.108323400027626	0	0	0	0	0	2	0	0	1	0	0	0
ENSOART00000028544	ENSOART00000028544	ensembl:	-		9:39999844-40004903	3878	0	0	0.0845562878625036	0	0.0688542720622782	0	0	0	0	0	0	3	0	3	0	0	0	0
ENSOART00000027148	ENSOART00000027148	ensembl:	-		4:69995852-69997201	1287	3.5900490357819	2.66722890930114	5.0959984695144	4.9030938482004	3.59607525343339	4.18565082317207	5.37786886284317	4.45362435650378	3.76925413999242	65	35	60	65	52	60	76	54	44
ENSOART00000027146	ENSOART00000027146	ensembl:	-		4:67498203-67653554	2825	0	0.0694488852480026	0	0	0.0630026699018454	0.0635752910604616	0.0322391337641819	0.075146700056642	0.0780555328895182	0	2	0	0	2	2	1	2	2
ENSOART00000027147	ENSOART00000027147	ensembl:	-		4:68741161-68742853	1597	0	0	0.479099350932065	0	0.055750985964184	0	0	0	0.207113538271342	0	0	7	0	1	0	0	0	3
ENSOART00000027145	ENSOART00000027145	ensembl:	-		4:64045961-64058681	2840	0.0500649546806237	0.138128637733225	0	0	0.0626699093213779	0.0316197530362331	0.0962065699476907	0.0747497984718358	0	2	4	0	0	2	1	3	2	0
ENSOART00000027499	ENSOART00000027499	ensembl:	-		1:123331825-123342291	540	0.65820274643722	1.45290863393466	1.01206569237898	0.539340323302044	0.329597300875395	0.831316760713342	0.337316862532644	0	0.816692149677367	5	8	5	3	2	5	2	0	4
ENSOART00000027495	ENSOART00000027495	ensembl:	-		1:118805801-118931927	4477	4.79499503509203	6.04630372526791	1.70911378733916	2.84066223441193	3.08141575510798	5.25416247392163	1.56631511712374	2.39462314677427	1.77309055259117	302	276	70	131	155	262	77	101	72
ENSOART00000027496	ENSOART00000027496	ensembl:	-		1:119133330-119308013	2809	0.430192071985977	0.558647986877284	0.505895934490271	0.725776583154762	0.82382252720998	0.575309364861166	0.616002330457218	0.642385238558247	0.863501489690915	17	16	13	21	26	18	19	17	22
ENSOART00000027497	ENSOART00000027497	ensembl:	-		1:123103169-123137359	1864	4.5761752372656	5.47211579031892	3.81173042068116	6.71860638791495	1.4324477274025	9.87411646040418	6.25370501195543	4.2138995833801	2.12935828724893	120	104	65	129	30	205	128	74	36
ENSOART00000027490	ENSOART00000027490	ensembl:	-		1:109264963-109270297	1165	0.549128785707625	1.26282925319306	0.750579191601234	0.833315520981699	0.534748456654885	0.616499488690648	0.547235081705319	0.637779396403475	0.37855258439981	9	15	8	10	7	8	7	7	4
ENSOART00000027491	ENSOART00000027491	ensembl:	-		1:111381716-111526818	3140	0.0452816787557233	0	0.0348099027952005	0	0.0283548804410197	0.114366545274619	0.0290049531477114	0.033804048990448	0	2	0	1	0	1	4	1	1	0
ENSOART00000027809	ENSOART00000027809	ensembl:	-		2:208644640-208651490	3695	0.230847103418812	0.106166530761125	0.147906758832111	0.262736828672173	0.36132187693845	0.29158925543064	0.221811912697209	0.229812641580529	0.566932439491866	12	4	5	10	15	12	9	8	19
ENSOART00000028120	ENSOART00000028120	ensembl:	-		21:48777727-48878909	2283	0.0934056118191536	1.37471940003354	0.383015662818851	0.127570641516909	0.233917535749028	0.589896255959533	0.0398929272377634	0.37194818687694	0.531225511288169	3	32	8	3	6	15	1	8	11
ENSOART00000028123	ENSOART00000028123	ensembl:	-		21:48872155-49009414	1258	1.01706682885434	3.04054764501822	1.12961977741111	0.848882225864903	1.4150109259283	1.42738012968269	0.796300574867897	1.01250919392693	0.96406028797368	18	39	13	11	20	20	11	12	11
ENSOART00000028122	ENSOART00000028122	ensembl:	-		21:48858052-48860366	2080	0	0	0	0	0	0.0863462486758674	0.0437863235018336	0	0	0	0	0	0	0	2	1	0	0
ENSOART00000028127	ENSOART00000028127	ensembl:	-		21:49449861-49504201	949	0.599235505647235	2.06694154510079	0.575885641606584	1.02298480710609	0.65646148788508	1.41910764210286	0.383880096454431	0.78294309463651	1.27796400660789	8	20	5	10	7	15	4	7	11
ENSOART00000027758	ENSOART00000027758	ensembl:	-		2:106229454-106232139	1800	0.394921647862332	0.381402526197968	0.242895766170955	0.593274355632249	0.24722189418346	0.399012169069225	0.354182705659276	0.648662140072264	0.49001528980642	10	7	4	11	5	8	7	11	8
ENSOART00000027751	ENSOART00000027751	ensembl:	-		2:98598274-98598966	481	0.295601811419899	0	0.454482722565196	0.605496412854686	1.66538586522359	1.30667619133266	0	0	0.458434262812659	2	0	2	3	9	7	0	0	2
ENSOART00000027754	ENSOART00000027754	ensembl:	-		2:104467828-104471925	2547	0.111623695435133	0.0770290933747968	0	0.190579619541358	0.489222619043099	0.246765311358857	0.250305799052492	0.0833488133726006	0.0865751395417703	4	2	0	5	14	7	7	2	2
ENSOART00000027531	ENSOART00000027531	ensembl:	-		1:188953503-188995664	2178	0.0326265107851958	0.585400816870665	0.401480605241248	0.089147160876371	0.16347621287526	0	0.0418161399833856	0.389879573296627	0.151864242708601	1	13	8	2	4	0	1	8	3
ENSOART00000028367	ENSOART00000028367	ensembl:	-		11:34153854-34164680	3178	2.81827585457185	15.2763562596416	9.87155755796888	5.16259680139968	7.70167234041168	9.32285711437829	2.89428449701014	6.81360394984239	9.40161057998946	126	495	287	169	275	330	101	204	271
ENSOART00000028364	ENSOART00000028364	ensembl:	-		11:27948348-28114948	4468	0.668194618459366	1.58046988426094	1.98165543161675	0.499746852835824	0.936246517824205	2.02954814555215	0.448409186742979	1.33037242042981	3.05979946369125	42	72	81	23	47	101	22	56	124
ENSOART00000028362	ENSOART00000028362	ensembl:	-		11:21293885-21294561	569	1.62408431974574	0.517116372572905	0.192096827375975	0.341234650946812	1.09487162039181	1.26225290742461	2.88097538377946	1.30582249000008	0.968835151198985	13	3	1	2	7	8	18	7	5
ENSOART00000028361	ENSOART00000028361	ensembl:	-		11:20316027-20329051	4034	1.3568261146496	2.33402408795978	1.11097416500255	0.938564469405144	0.882540280028658	1.42440346097788	0.812708237035916	0.920938270711512	1.55783956392018	77	96	41	39	40	64	36	35	57
ENSOART00000028369	ENSOART00000028369	ensembl:	-		11:34164801-34285126	3440	1.50844988485771	7.49834267409306	6.45054190884612	2.20126108696532	3.64809544328943	5.48089073633099	1.6678546504441	4.69014774227871	6.50612921196752	73	263	203	78	141	210	63	152	203
ENSOART00000028368	ENSOART00000028368	ensembl:	-		11:34153854-34164680	1265	3.03436648411775	15.0411055905109	12.6159868936731	2.53255456159221	8.5133997524069	11.0718997870632	1.72778130603578	5.53798506939166	14.7293192198122	54	194	146	33	121	156	24	66	169
ENSOART00000028710	ENSOART00000028710	ensembl:	-		7:3621597-3627578	2963	0	0	0	0.0655290301683213	0.0600683572300753	0	0	0	0	0	0	0	2	2	0	0	0	0
ENSOART00000027341	ENSOART00000027341	ensembl:	-		12:7298243-7304939	1381	0	0	1.10815696941354	0.351488986945576	0.193350374408048	0.390087725856703	0.59347937539188	0.768607630919673	0.319343780467616	0	0	14	5	3	6	9	10	4
ENSOART00000027384	ENSOART00000027384	ensembl:	-		12:68769977-68771790	1410	0.100840050562391	0.278216546923659	0.387599626868545	0	0	0.318376631762557	0.129185181395481	0	0.0781939292244287	2	4	5	0	0	5	2	0	1
ENSOART00000027385	ENSOART00000027385	ensembl:	-		12:68996915-68997668	704	0.302904846282852	0	0	0	0	0	0	0	0	3	0	0	0	0	0	0	0	0
ENSOART00000027383	ENSOART00000027383	ensembl:	-		12:62613982-62615810	1603	0.709512782107581	0.550666031180255	0.750128191159895	1.02955794716423	0.943896991740666	0.672128695456153	1.19307651404988	0.860811777785458	1.100471018904	16	9	11	17	17	12	21	13	16
ENSOART00000028838	ENSOART00000028838	ensembl:	-		26:32439983-32440961	904	0.15728370718249	0.108458092000415	0.24182100614365	0.107390772338903	0	0	0.402989172052274	0.234833437677006	0	2	1	2	1	0	0	4	2	0
ENSOART00000028446	ENSOART00000028446	ensembl:	-		18:19976337-19978300	1342	0	0.146194560972882	0	0	0	0.0669151256504486	0	0	0.246468197182812	0	2	0	0	0	1	0	0	3
ENSOART00000028445	ENSOART00000028445	ensembl:	-		18:19952218-19985181	4850	0.0439680436666242	0.0202156938491496	0.0450734411451256	0.04003350853376	0.0366974314376728	0.0370309685042895	0	0	0.181861344670424	3	1	2	2	2	2	0	0	8
ENSOART00000027432	ENSOART00000027432	ensembl:	-		1:9905187-9912815	1859	0.573547637932027	0.369297766087327	0.235186863425346	0.313333808050677	0.718173391763085	0.772745159213833	0.83281303953023	0.742270726083964	0.771003078366745	15	7	4	6	15	16	17	13	13
ENSOART00000027430	ENSOART00000027430	ensembl:	-		1:9484343-9492692	5388	0	0	0.0202863947247457	0.0180180508898233	0	0.0499834546286935	0	0.0197002067242032	0.0204627765787759	0	0	1	1	0	3	0	1	1
ENSOART00000027889	ENSOART00000027889	ensembl:	-		24:41650869-41652939	654	1.52165828505425	3.44918462124561	4.6798289015858	1.33598061735369	1.63313068536706	2.333843042204	1.81024041124074	2.92141414211028	4.88891401527048	14	23	28	9	12	17	13	18	29
ENSOART00000027888	ENSOART00000027888	ensembl:	-		24:41650869-41652939	810	2.98372723508299	10.4131967996042	7.69214906905463	4.19486918123812	7.80158565197366	6.42880544713167	2.58588617191536	3.27607141450638	5.58057994759371	34	86	57	35	71	58	23	25	41
ENSOART00000027887	ENSOART00000027887	ensembl:	-		24:41483434-41508821	303	3.28437134793888	3.56042864131584	4.32923625480608	1.28160076824248	2.6437313570051	3.55584917101061	2.10405567718382	4.90437621656797	3.63872739955262	14	11	12	4	9	12	7	14	10
ENSOART00000027885	ENSOART00000027885	ensembl:	-		24:41467426-41498595	2230	0.733138813351957	3.78237193169481	3.23514286947382	0.957752322993765	1.19734644120101	1.57017412899495	0.449213508154177	0.999569054004549	2.07646780168491	23	86	66	22	30	39	11	21	42
ENSOART00000027884	ENSOART00000027884	ensembl:	-		24:41319931-41325481	4745	0.149812216259683	0.868123952250138	0.806291088084027	0.347814834416071	0.543969303686058	0.737932203932294	0.153534133726527	0.648724278413108	0.743542694753683	10	42	35	17	29	39	8	29	32
ENSOART00000027881	ENSOART00000027881	ensembl:	-		24:40865291-40910697	5044	0.0281888325323099	0.136107166367237	0	0	0.0529375232072789	0.124605719276568	0.0361124317540895	0	0.0437166693919288	2	7	0	0	3	7	2	0	2
ENSOART00000027263	ENSOART00000027263	ensembl:	-		X:11119320-11120748	710	1.10129507977796	1.38135741288778	0.769740104062885	0.546936665883763	1.00283982617992	1.51749619551579	1.0260837528625	0.747497984718358	0.931719213012207	11	10	5	4	8	12	8	5	6
ENSOART00000027261	ENSOART00000027261	ensembl:	-		X:10659012-10683916	3456	0	0	0	0	0.0257622466969913	0	0.0527057597707256	0	0	0	0	0	0	1	0	2	0	0
ENSOART00000027266	ENSOART00000027266	ensembl:	-		X:16176678-16178621	1216	0.17536596363744	0.564576107858833	0.449437067339349	0.0798365610151053	0	0.221472741397533	0.224692975864672	0.261870182146398	0.362675790152778	3	7	5	1	0	3	3	3	4
ENSOART00000027264	ENSOART00000027264	ensembl:	-		X:11696002-11700135	910	0	0	0.360339872890977	0	0	0	0	0	0	0	0	3	0	0	0	0	0	0
ENSOART00000028675	ENSOART00000028675	ensembl:	-		19:21076104-21079957	2627	0.757643333403488	0.336017376468195	0.416121962562764	0.480417341654657	0.203286537539029	0.27340003971245	0.589341241144537	0.323242371770101	0.125908001758406	28	9	10	13	6	8	17	8	3
ENSOART00000028671	ENSOART00000028671	ensembl:	-		19:10258879-10261370	1431	0.19867613715813	0	0	0	0	0	0	0	0	4	0	0	0	0	0	0	0	0
ENSOART00000028672	ENSOART00000028672	ensembl:	-		19:14332552-14333788	869	0.245391267874715	0.338595185263502	0.503121264795994	0.22343212472812	0	0.309908922369851	0	0.366437447054109	0.253747848576397	3	3	4	2	0	3	0	3	2
ENSOART00000028679	ENSOART00000028679	ensembl:	-		19:30032468-30034695	1498	1.66084311830443	4.58307557579515	5.47277563404677	2.20344644766923	3.68373416350208	3.71591679862414	2.97893672609644	1.98401334261695	5.37275022974441	35	70	75	34	62	62	49	28	73
ENSOART00000028678	ENSOART00000028678	ensembl:	-		19:28026414-28035394	1060	0.134136293672614	0	0	0.0915860926361962	0	0	0.0859203329092584	0.200273044962277	0	2	0	0	1	0	0	1	2	0
ENSOART00000028099	ENSOART00000028099	ensembl:	-		21:41797305-41809180	2045	0.590909305725481	0.287764514419543	0.0534489461011881	0.332307485261895	0.304636651346182	0.26342843491839	0.846137186432433	0.36333153878242	0.161740988077914	17	6	1	7	7	6	19	7	3
ENSOART00000028098	ENSOART00000028098	ensembl:	-		21:41633711-41670040	3400	0	0.0577038531840022	0	0	0.0523478066096215	0.0528235874252365	0	0.0624380669588276	0	0	2	0	0	2	2	0	2	0
ENSOART00000028643	ENSOART00000028643	ensembl:	-		6:115168155-115203751	1540	1.56936302624495	1.21005286437161	0.283904142277739	0.378238668289745	0.635735807561856	1.63238058926326	0.236559877620296	0	0.429558857947186	34	19	4	6	11	28	4	0	6
ENSOART00000028010	ENSOART00000028010	ensembl:	-		3:149308589-149309664	622	6.97120185977175	9.93379709790342	7.73244222821716	5.61885095658721	8.87175848380405	7.93894141260008	6.29581012602827	7.50862927414839	11.5214667564398	61	63	44	36	62	55	43	44	65
ENSOART00000028016	ENSOART00000028016	ensembl:	-		3:170699103-170755055	1414	0.0502549791302379	0.138750424912028	0	0	0	0	0	0.0750669829066526	0	1	2	0	0	0	0	0	1	0
ENSOART00000027560	ENSOART00000027560	ensembl:	-		1:245254734-245307064	4911	0	0	0	0.0395362485010662	0	0	0	0.0216136660211783	0.0224503034425666	0	0	0	2	0	0	0	1	1
ENSOART00000027561	ENSOART00000027561	ensembl:	-		1:245254734-245300479	5445	0.0652763054317904	0.108076847013401	0.160592242096499	0.106976593051645	0.0817262460110612	0	0.100358735960125	0.116963871988988	0.141739959861361	5	6	8	6	5	0	6	6	7
ENSOART00000027566	ENSOART00000027566	ensembl:	-		1:248316948-248325818	2169	0.131076787585654	0	0	0	0	0	0	0	0	4	0	0	0	0	0	0	0	0
ENSOART00000027568	ENSOART00000027568	ensembl:	-		1:251419262-251497362	1594	0.312179394208952	0.184591728979914	0.754363544811363	0.365425062212176	0	0.168952856674655	0.171409447083715	0.266360636963631	0	7	3	11	6	0	3	3	4	0
ENSOART00000027978	ENSOART00000027978	ensembl:	-		3:96107290-96115335	1407	0	0	0	0	0.126497897990557	0.319055473194886	0	0	0	0	0	0	0	2	5	0	0	0
ENSOART00000027972	ENSOART00000027972	ensembl:	-		3:85546784-85589942	1159	0	0.0845954401797891	0.0943081059335028	0	0	0	0	0	0.28538422831694	0	1	1	0	0	0	0	0	3
ENSOART00000027971	ENSOART00000027971	ensembl:	-		3:85210303-85211049	315	0.225589017429068	0.311257508471033	0.693987903345585	0	0	0	0	0	0	1	1	2	0	0	0	0	0	0
ENSOART00000027970	ENSOART00000027970	ensembl:	-		3:84646174-84681092	2157	0.0988618506180471	0	0.202694658835289	0	0.165067775448455	0.124854359545387	0	0.0492094176309721	0.102228502741256	3	0	4	0	4	3	0	1	2
ENSOART00000027977	ENSOART00000027977	ensembl:	-		3:93611027-93612701	1610	0.0441369816709046	0	0	0	0.165848985750009	0	0	0	0	1	0	0	0	3	0	0	0	0
ENSOART00000027976	ENSOART00000027976	ensembl:	-		3:92539812-92543337	1603	0	0.0611641392191987	0.1363731687797	0.060562232186131	0.16657321712883	0	0	0	0.275117754726	0	1	2	1	3	0	0	0	4
ENSOART00000028363	ENSOART00000028363	ensembl:	-		11:22203535-22209062	5386	0.382731076372284	0.418820412605762	0.101469638671491	0.234321640647379	0.198304394398451	0.266716162454236	0.13526169040705	0.0985376103137828	0.143292625593225	29	23	5	13	12	16	8	5	7
ENSOART00000028360	ENSOART00000028360	ensembl:	-		11:20249879-20329579	975	0.291595438229009	1.30769536322493	0.448422952930994	0	0.821590360176969	0.552524255803187	0.0934108234705783	0.76206461211287	1.13080451493789	4	13	4	0	9	6	1	7	10
ENSOART00000028209	ENSOART00000028209	ensembl:	-		13:27138898-27142340	428	0	0.458395095386933	0.76614318768876	0	0.208024122861687	0	0	0.496003335654238	1.28800747904725	0	2	3	0	1	0	0	2	5
ENSOART00000028200	ENSOART00000028200	ensembl:	-		13:10613775-10615031	1104	2.25357155001815	1.7767459477361	0.59403855857027	0.175871844555014	0.886805383736647	3.49691961940311	0.329983887260195	0.769164592971064	1.99734493127617	35	20	6	2	11	43	4	8	20
ENSOART00000028203	ENSOART00000028203	ensembl:	-		13:20370130-20373691	2933	0.533187525838632	0.535029728993621	0.968974398937353	0.430295382382129	0.455194113633677	0.734659105115282	0.403647197051293	0.325708293375405	0.488678732589083	22	16	26	13	15	24	13	9	13
ENSOART00000028978	ENSOART00000028978	ensembl:	-		14:53982350-53985799	2569	0.0553462325001834	0	0	0	0	0.0699105477796046	0.0354517527768836	0	0	2	0	0	0	0	2	1	0	0
ENSOART00000028979	ENSOART00000028979	ensembl:	-		14:55605267-55611656	5297	0	0.0740580198531921	0.144444338953843	0.0366551852725573	0.0336006310124057	0	0	0.0400772942533535	0	0	4	7	2	2	0	0	2	0
ENSOART00000028976	ENSOART00000028976	ensembl:	-		14:52389907-52393264	700	1.42166359775069	4.90389086610081	3.43541361853648	2.91243774583104	3.17869022049719	4.10438071708148	1.0407420921891	3.03270610942877	2.99259337703207	14	35	22	21	25	32	8	20	19
ENSOART00000028977	ENSOART00000028977	ensembl:	-		14:52806574-52810109	3387	0.188879549852195	0.144798440159312	0.225899516810897	0.057325809385514	0.0788358036780381	0.0795130952286391	0.134448705172444	0.0626777170534437	0.227863620149132	9	5	7	2	3	3	5	2	7
ENSOART00000028974	ENSOART00000028974	ensembl:	-		14:50471343-50473519	1027	0	0	0	0	0	0	0	0.413416606932841	0	0	0	0	0	0	0	0	4	0
ENSOART00000028975	ENSOART00000028975	ensembl:	-		14:50701621-50891922	4140	0.309050741714678	0.521188557276874	0.396055040950974	0.328294109836027	0.537459699117882	0.542163104813049	0.263966588422132	0.615331674376851	0.346206454754536	18	22	15	14	25	25	12	24	13
ENSOART00000028972	ENSOART00000028972	ensembl:	-		14:48658663-48739254	915	1.63145188283558	4.18033763653871	2.0309006110283	1.37929656451015	1.36180329038554	2.25678148271062	1.39341287632268	1.85608242762853	2.77139795054451	21	39	17	13	14	23	14	16	23
ENSOART00000028973	ENSOART00000028973	ensembl:	-		14:50379354-50381234	1064	0.13363202189189	0.184392012054142	0.102728472534708	0	0	0.168797177862598	0	0	0	2	2	1	0	0	2	0	0	0
ENSOART00000028970	ENSOART00000028970	ensembl:	-		14:47264767-47268694	3840	1.79559663762714	3.090445870693	1.45177660866476	1.56745781459657	1.46020364448282	2.24455991238067	1.35181423964188	1.54794374335427	2.29691508479225	97	121	51	62	63	96	57	56	80
ENSOART00000028971	ENSOART00000028971	ensembl:	-		14:47555583-47663167	1651	18.9871456183353	36.5339347192209	51.1125663737814	42.2195244599202	38.1135569274025	34.4771737787818	28.7936887328757	41.1465487856072	50.6184228093671	441	615	772	718	707	634	522	640	758
ENSOART00000028567	ENSOART00000028567	ensembl:	-		9:82290877-82292279	724	1.47268654546359	1.62563102759107	0.603884501529998	1.47499149190338	2.58153586009077	2.23210498051798	1.38362724196659	1.17286976607742	0.609135028764887	15	12	4	11	21	18	11	8	4
ENSOART00000028568	ENSOART00000028568	ensembl:	-		9:82943793-82976924	4498	0	0.0436178525623849	0.291631521833313	0.086332821871381	0.158296193105323	0.0199644505608942	0	0.0943928090973827	0.539256488337434	0	2	12	4	8	1	0	4	22
ENSOART00000028251	ENSOART00000028251	ensembl:	-		13:74377503-74380241	837	0	0	0	0	0	0	0.43524756455825	0	0	0	0	0	0	0	0	4	0	0
ENSOART00000028018	ENSOART00000028018	ensembl:	-		3:174577386-174723159	3252	0.0655734968582803	0.0603299818036923	0	0	0	0.027613806464607	0	0	0.101709815688602	3	2	0	0	0	1	0	0	3
ENSOART00000029000	ENSOART00000029000	ensembl:	-		14:60348012-60352287	904	0.314497292337704	0.650971716800847	0.4836420122873	0	0	0	0	0.469666875354013	0.243923540279745	4	6	4	0	0	0	0	4	2
ENSOART00000029005	ENSOART00000029005	ensembl:	-		14:61815609-61817431	1763	5.44315319993839	1.72458211860931	3.90610284435384	4.95593490498759	3.73579985165019	4.48145134253425	5.16560441214658	3.01034355728891	4.25247455650874	135	31	63	90	74	88	100	50	68
ENSOART00000029008	ENSOART00000029008	ensembl:	-		16:4263462-4266705	3149	0.0677183270190942	0	0.104131243039311	0.0924877023128307	0.141314515570095	0.0855226591106385	0.0289220555363016	0.10112230596698	0.0700244142308317	3	0	3	3	5	3	1	3	2
ENSOART00000028925	ENSOART00000028925	ensembl:	-		20:41498916-41527985	989	0	0	0	0	0	0	0	0.214650584084948	0.111479717094484	0	0	0	0	0	0	0	2	1
ENSOART00000027656	ENSOART00000027656	ensembl:	-		17:71096542-71102022	734	0.484236352964712	0	0.148914298061212	0.396789883628207	0.485083367360105	0.733938895651372	0.248162269438185	0.433833980231636	0.751045233013927	5	0	1	3	4	6	2	3	5
ENSOART00000027657	ENSOART00000027657	ensembl:	-		17:71225798-71292372	1465	0.242613981621911	0.669463319556535	0.298438484032573	0.39760242263905	0.486017936237367	0.857974780704923	0.310838064449877	0.507176107037575	0.602066567680243	5	10	4	6	8	14	5	7	8
ENSOART00000027654	ENSOART00000027654	ensembl:	-		17:70994293-71060132	822	0	0	0	0.472414881724419	0.216523774297705	0.218491724143314	0	0	0	0	0	0	4	2	2	0	0	0
ENSOART00000027655	ENSOART00000027655	ensembl:	-		17:71059436-71061903	1446	0	0	0.0755899687254009	0.0671377995811674	0	0.124204839035826	0	0.146811499073315	0.152494384794529	0	0	1	1	0	2	0	2	2
ENSOART00000027652	ENSOART00000027652	ensembl:	-		17:70973519-70975904	2007	0.672941704784046	0.781884501812801	0.163382802357145	0.386970635553036	0.620852023269942	0.536832236580077	0.317652650815494	0.687534269950219	0.329606697179206	19	16	3	8	14	12	7	13	6
ENSOART00000027650	ENSOART00000027650	ensembl:	-		17:70668874-70827897	1584	0.179485828455356	0.371514161608564	0.621040311232555	0	0.224779792703483	0.623498863758404	0.172491577431466	0.0670105516603579	0.417626667448653	4	6	9	0	4	11	3	1	6
ENSOART00000027651	ENSOART00000027651	ensembl:	-		17:70969035-70970415	810	0.0877290623335264	0	0.269884184634394	0	0	0	0.337316862532644	0.131042856580255	0.408346074838683	1	0	2	0	0	0	3	1	3
ENSOART00000027658	ENSOART00000027658	ensembl:	-		17:71337608-71458137	3109	0.182912349584827	0.504741780359695	0.210941964831643	0.187355274739855	0.171770258641052	0.173274734450983	0.0878824891127184	0.238987776394354	0.496477376291484	8	16	6	6	6	6	3	7	14
ENSOART00000027659	ENSOART00000027659	ensembl:	-		17:71385150-71387121	1927	2.914145110263	9.46675034233084	3.91406296374701	2.67011244644603	3.27933802703615	5.12508724300701	1.13422073281539	3.02955851616522	3.49005633714572	79	186	69	53	71	110	24	55	61
ENSOART00000028738	ENSOART00000028738	ensembl:	-		7:57124667-57275633	1543	0.506752758679426	0.317843367997142	1.06264929976476	0.440420484355526	0.288398839617776	0.58186785584602	0.767269753046949	1.16944921264427	0.785993416896234	11	5	15	7	5	10	13	17	11
ENSOART00000028731	ENSOART00000028731	ensembl:	-		7:28043173-28200832	806	0	0	0	0.361344633477796	0	0	0	0	0.410372606227461	0	0	0	3	0	0	0	0	3
ENSOART00000028735	ENSOART00000028735	ensembl:	-		7:45065916-45069003	3016	0.0471433923385183	0	0	0	0	0	0	0.0351938706332914	0	2	0	0	0	0	0	0	1	0
ENSOART00000028195	ENSOART00000028195	ensembl:	-		23:60467886-60471837	3511	0	0	0	0	0	0	0.0259400606333847	0	0.0942068700140511	0	0	0	0	0	0	1	0	3
ENSOART00000028190	ENSOART00000028190	ensembl:	-		23:55604297-55643496	306	0	0	0	0.317259013707085	0.290961845048372	0.293464374584647	1.19053010305639	1.04063444931379	0.360305360151779	0	0	0	1	1	1	4	3	1
ENSOART00000028191	ENSOART00000028191	ensembl:	-		23:55645119-55681920	2001	0.568390299709372	0.441138254863543	0.600927281573869	1.35845838552839	0.800650276034528	0.717907671653431	2.00253345890724	2.3870625299102	0.275495852589816	16	9	11	28	18	16	44	45	5
ENSOART00000028193	ENSOART00000028193	ensembl:	-		23:58662012-58723449	1253	0	0	0	0	0	0	0	0	0.263974717174249	0	0	0	0	0	0	0	0	3
ENSOART00000027857	ENSOART00000027857	ensembl:	-		24:32922765-32941636	1218	1.63409608936861	5.87823187892866	4.48728988710652	3.50704052590492	5.04204903852961	5.01244212951319	2.24310071382442	2.96298872760282	3.71122311785789	28	73	50	44	69	68	30	34	41
ENSOART00000027858	ENSOART00000027858	ensembl:	-		24:33169760-33290472	2107	0	0.139648417652579	0	0.0921511705689302	0	0	0.0864504536153905	0.151131533692463	0	0	3	0	2	0	0	2	3	0
ENSOART00000027197	ENSOART00000027197	ensembl:	-		5:9660559-9708688	526	1.21622630294559	3.16974963936629	3.11723929569778	1.10739077788252	1.35364311138354	1.87760874561466	0.346294877885224	1.61436827117881	2.09607300772708	9	17	15	6	8	11	2	8	10
ENSOART00000027191	ENSOART00000027191	ensembl:	-		5:4104461-4213753	2321	0.24501270782388	0.464803911382465	0.14127931250788	0.334618727080975	0.191727449172869	0.07738052444886	0.392361296984059	0.228661598082738	0.142507677991958	8	11	3	8	5	2	10	5	3
ENSOART00000027190	ENSOART00000027190	ensembl:	-		5:4093082-4209811	921	0.0771558528666193	0.532499801107047	0.593393565564222	0.210817064482884	0.386591956180583	0.292411350205647	0.296663038709491	0.345748253517938	0.47884230274243	1	5	5	2	4	3	3	3	4
ENSOART00000027192	ENSOART00000027192	ensembl:	-		5:4220019-4309765	1615	0	0.121481796176847	0	0	0	0.111207552474182	0.338361187184448	0	0	0	2	0	0	0	2	6	0	0
ENSOART00000027447	ENSOART00000027447	ensembl:	-		1:43033018-43091076	1225	0.290146516796815	0.320232923397844	0.267681048433297	0.31700002675712	0.290654033993728	0.439764203598454	0.297389560436943	0.259946237951037	0.63001965832254	5	4	3	4	4	6	4	3	7
ENSOART00000027446	ENSOART00000027446	ensembl:	-		1:38794583-38795508	777	0.365901611677328	0.757372499341012	0.562692894604529	0.249887408479712	0.801778574006359	0.577749100109659	0	0	0.283792638884027	4	6	4	2	7	5	0	0	2
ENSOART00000027445	ENSOART00000027445	ensembl:	-		1:38794583-38796108	1184	0	3.7276075755244	2.0310722406888	0	0	0	0	0	0	0	45	22	0	0	0	0	0	0
ENSOART00000027444	ENSOART00000027444	ensembl:	-		1:38794583-38796108	1333	3.83946516385625	1.69224811875066	0.984064955143467	2.11204537707177	3.4719796332849	5.52294641221288	3.34767232985181	2.1499679470444	3.47376083852765	72	23	12	29	52	82	49	27	42
ENSOART00000027441	ENSOART00000027441	ensembl:	-		1:36969481-37040346	2267	0.0940648486030558	0.12979233171327	0.144644589471014	0.171294677008148	0	0	0.120523448897857	0.187286658720788	0.097268143102289	3	3	3	4	0	0	3	4	2
ENSOART00000027448	ENSOART00000027448	ensembl:	-		1:43541411-43542272	417	0	0	0	0.698426317945093	0	0	0	0	0	0	0	0	3	0	0	0	0	0
ENSOART00000027838	ENSOART00000027838	ensembl:	-		24:901683-906244	4367	0.0651031720341846	0.0673778832136439	0	0.0666919566253959	0.0203879836466228	0.0616695336705749	0	0	0	4	3	0	3	1	3	0	0	0
ENSOART00000027839	ENSOART00000027839	ensembl:	-		24:1004693-1005334	581	0.611754704089671	0.337681757014815	0	0.501280162793639	0.306338283085565	0.618091139694153	0.313513090822079	0.730772556488859	1.51811965860853	5	2	0	3	2	4	2	4	8
ENSOART00000027836	ENSOART00000027836	ensembl:	-		24:228211-228899	538	0.132082789015161	1.09382608176202	0.203165603674591	0	0.330822569651883	0	0	0	0.204932044993391	1	6	1	0	2	0	0	0	1
ENSOART00000027831	ENSOART00000027831	ensembl:	-		2:247799736-247857211	622	0.342837639522713	0.946106803839173	0.351456896388841	0.312158386477068	0.429287567616583	0.721721946600008	0	1.19455465725088	0.531769004211147	3	6	2	2	3	5	0	7	3
ENSOART00000027577	ENSOART00000027577	ensembl:	-		1:262701571-262705739	4075	0.453532408725888	0.649828729682697	0.214582762752255	0.381177946284635	0.69893281301788	0.616899658273724	0.245827269492961	0.494907868164449	0.189392412624567	26	27	8	16	32	28	11	19	7
ENSOART00000027576	ENSOART00000027576	ensembl:	-		1:262688359-262829604	962	0	0	0	0.403664275236457	0	0	0.378692527583426	0	0	0	0	0	4	0	0	4	0	0
ENSOART00000027763	ENSOART00000027763	ensembl:	-		2:116100910-116103516	2388	0.208381052918371	0.616078760456413	0.366174521865761	0.20326896606861	0	0.26319566500461	0.152555364964512	0.222246050732845	0.138509346993021	7	15	8	5	0	7	4	5	3
ENSOART00000027760	ENSOART00000027760	ensembl:	-		2:114046190-114223286	1141	4.85933136458075	4.04003546910298	2.20341159312223	2.80778397932878	3.43219331689836	4.87856561291758	2.2348339734185	2.97688943256811	3.57526493219846	78	47	23	33	44	62	28	32	37
ENSOART00000027766	ENSOART00000027766	ensembl:	-		2:125725808-125754038	1278	0.222461308508047	0.690702384962401	0.171053356458419	0.151926851634379	0.139266465158617	0.351260603118314	0	0.166110663270746	0.517621785006782	4	9	2	2	2	5	0	2	6
ENSOART00000027767	ENSOART00000027767	ensembl:	-		2:125816906-125821410	713	1.59515987337791	0.962867527568501	1.99307388496938	3.54013003233319	1.49799083903234	1.51111121853606	2.1713877145676	2.38192906210394	2.47413049551629	16	7	13	26	12	12	17	16	16
ENSOART00000027768	ENSOART00000027768	ensembl:	-		2:132870898-132877353	5346	0.0531809862089944	0.220156540212483	0.388492377224981	0.181596068451867	0.199788153428743	0.251914169913134	0.136273749444888	0.337534630585506	0.618706173998005	4	12	19	10	12	15	8	17	30
ENSOART00000028684	ENSOART00000028684	ensembl:	-		19:49698589-49704350	5686	0.137516620936045	0.310488092853306	0.192253323188952	0.102442411038728	0.187841622973982	0.157900475126699	0.176177650929267	0.149341841477322	0.329635681236292	11	18	10	6	12	10	11	8	17
ENSOART00000028685	ENSOART00000028685	ensembl:	-		19:51196706-51225747	5364	0.0530025265237293	0.164563319907149	0.0815086463660922	0	0.0331809363297377	0.100430863051474	0.0509371101139899	0.0989417541293874	0.267206324139407	4	9	4	0	2	6	3	5	13
ENSOART00000028686	ENSOART00000028686	ensembl:	-		19:51248554-51383219	1192	0	0.329098432183187	0	0	0.0746932253228203	0.225931924110235	0.0764056651709848	0.0890475787164487	0	0	4	0	0	1	3	1	1	0
ENSOART00000028680	ENSOART00000028680	ensembl:	-		19:33849362-33852892	1128	0.189046996261638	0	0	0.172129890415546	0.236717080724747	0	0.0807407383721754	0	0.195484823061072	3	0	0	2	3	0	1	0	2
ENSOART00000028682	ENSOART00000028682	ensembl:	-		19:46750971-46910233	4859	0.980155912810101	1.00922387646668	2.3846175619784	3.13680953622469	2.6559990772912	1.57058815874634	2.62394069116126	3.10200886913741	1.45217099862094	67	50	106	157	145	85	140	142	64
ENSOART00000028688	ENSOART00000028688	ensembl:	-		19:52173405-52175515	1019	0.139533337873377	0.577505821381713	0.321795175987035	0.285813321475077	0	0.352415065910012	0.17875476522829	0.104165568037298	0.216395368413041	2	6	3	3	0	4	2	1	2
ENSOART00000028689	ENSOART00000028689	ensembl:	-		19:52714422-52717759	2455	2.1136731584157	5.79276002908879	4.80874253491117	2.37265804141022	3.66165659550995	5.15654155625606	1.44671759138669	3.32918247043199	4.04182823937543	73	145	108	60	101	141	39	77	90
ENSOART00000029089	ENSOART00000029089	ensembl:	-		8:49138519-49142816	2649	0	0	0	0	0.10079911931201	0	0	0	0	0	0	0	0	3	0	0	0	0
ENSOART00000028355	ENSOART00000028355	ensembl:	-		11:16946816-16952186	1694	0.0839341625106088	0.347389865400216	0.0645236686994862	0.22923555653924	0.0525586331669432	0.318011304255081	0	0.125318434273916	0.130169350893087	2	6	1	4	1	6	0	2	2
ENSOART00000028351	ENSOART00000028351	ensembl:	-		11:4107825-4217222	3062	0	0	0.0713932689594577	0	0	0.117279866806761	0	0.103995474033318	0	0	0	2	0	0	4	0	3	0
ENSOART00000027331	ENSOART00000027331	ensembl:	-		12:646701-793221	592	0	0	0	0	0	0.151689355781929	0.307687678661533	0	0.372477838535286	0	0	0	0	0	1	2	0	2
ENSOART00000027333	ENSOART00000027333	ensembl:	-		12:1800103-1802860	2106	0	0.0931591172011431	0.0519008047373835	0	0	0	0	0	0	0	2	1	0	0	0	0	0	0
ENSOART00000028118	ENSOART00000028118	ensembl:	-		21:48606992-48608548	534	6.25641018418079	26.2641063119614	13.91965587334	9.63540577584551	9.33370794533912	17.6538053679575	5.45739283746398	3.97545744681674	15.8977408333013	47	143	68	53	56	105	32	20	77
ENSOART00000028119	ENSOART00000028119	ensembl:	-		21:48715451-48729793	3314	0.300291043580411	0.118372157864321	0.0329822253400512	0.117177137229171	0.134278638965066	0.162556170611982	0.0824461854711652	0.0960875502383888	0.765186820986187	14	4	1	4	5	6	3	3	23
ENSOART00000028115	ENSOART00000028115	ensembl:	-		21:48432430-48562231	645	0	0	0	0.301027157191839	0.275941926314284	0	0	0.16456544779846	0.170935566211542	0	0	0	2	2	0	0	1	1
ENSOART00000028116	ENSOART00000028116	ensembl:	-		21:48487893-48508977	3490	0.61103538915299	3.54090099148445	1.50337863755266	0.751058444483649	1.04559189327321	2.05804493196655	0.417514007909136	1.45986998963906	2.05339608094716	30	126	48	27	41	80	16	48	65
ENSOART00000028117	ENSOART00000028117	ensembl:	-		21:48537987-48545859	4205	0	0.093290209551096	0	0	0.0423264072467808	0	0.0649766132345878	0.100970001265167	0.0524392105619237	0	4	0	0	2	0	3	4	2
ENSOART00000028110	ENSOART00000028110	ensembl:	-		21:46186282-46187625	1243	32.0818729349435	47.8156142988349	49.0705139775835	38.5045468942844	22.1255417967409	30.1199742317687	29.8192849433985	42.8679564000152	47.0987350870707	561	606	558	493	309	417	407	502	531
ENSOART00000028111	ENSOART00000028111	ensembl:	-		21:47814469-47820009	4147	0.291393665350521	0.52030880808446	0.395386513030391	0.117049985766057	0.343388606987096	0.368057234049052	0.197635644421555	0.10238216911503	0.239276817424162	17	22	15	5	16	17	9	4	9
ENSOART00000028112	ENSOART00000028112	ensembl:	-		21:48386608-48418330	5702	0.0872700726708296	0.0860105781865294	0.057507766455768	0.0340516514185787	0.0312140551513001	0.062979823248387	0	0.037230695836551	0.0773436970932617	7	5	3	2	2	4	0	2	4
ENSOART00000028113	ENSOART00000028113	ensembl:	-		21:48407832-48410876	2359	0.0602731968177072	0	0.0463345039325687	0	0.113190702440659	0.0380670193399331	0.115823085481747	0	0.0934747267540861	2	0	1	0	3	1	3	0	2
ENSOART00000027359	ENSOART00000027359	ensembl:	-		12:24082989-24108601	1070	0.797177614142533	0	0	0.181460295690407	0	0	0	0	0	12	0	0	2	0	0	0	0	0
ENSOART00000028806	ENSOART00000028806	ensembl:	-		22:50014629-50018115	1871	0.607882944798746	2.41129528839619	0.525776511487102	0.570761004884045	0.998948136133466	0.575853713958425	0.876149114575367	2.3827247358954	0.353565281260645	16	46	9	11	21	12	18	42	6
ENSOART00000028804	ENSOART00000028804	ensembl:	-		22:49982214-49986073	740	0	0.530115312381566	0	0.262381778903697	0.601350553419227	0.485285070489598	0.123075071464613	0.286877604945964	0.446973406242343	0	4	0	2	5	4	1	2	3
ENSOART00000028808	ENSOART00000028808	ensembl:	-		22:50019726-50039007	1689	0	0.116159325533219	0	0	0	0.159449883682298	0	0.125689418389588	0.130554695330307	0	2	0	0	0	3	0	2	2
ENSOART00000028809	ENSOART00000028809	ensembl:	-		22:50121008-50162409	2190	0.064924416115512	0.179125721991945	0.49915634504675	0.132988024923792	0.121925510071925	0.204982214970413	0	0.0969358117169012	0.0503440366239473	2	4	10	3	3	5	0	2	1
ENSOART00000027117	ENSOART00000027117	ensembl:	-		4:4677784-4679883	2063	0.137811707354961	0.142626861848756	0.211930382504953	0.141174878615174	0.129431346125795	0	0.132441424455376	0	0.21377302996887	4	3	4	3	3	0	3	0	4
ENSOART00000028442	ENSOART00000028442	ensembl:	-		18:17918562-17956399	3839	0	0	0.0854152863586322	0	0	0	0	0	0.0287193123746925	0	0	3	0	0	0	0	0	1
ENSOART00000027252	ENSOART00000027252	ensembl:	-		5:107849027-107882075	1830	0.271920193644301	0.321572913654626	0.35837080254731	0.0530498678657749	0.19456349270072	0.441542078113392	0.248840308425721	0.34801545518035	0.240991126134305	7	6	6	1	4	9	5	6	4
ENSOART00000027253	ENSOART00000027253	ensembl:	-		5:107849027-107855406	552	0.515046290350152	0.355422284104361	0.59403855857027	0.527615533665043	0.483726208437527	0.487881981049639	0.164991943630098	0.384582296485532	0.798937972510468	4	2	3	3	3	3	1	2	4
ENSOART00000027250	ENSOART00000027250	ensembl:	-		5:106375698-106491517	3085	0.276492721923018	0.286132138729967	0.637788380508207	0.0629376066089906	0.17310655887035	0.145514116948203	0	0.481694001173451	0.178692771809472	12	9	18	2	6	5	0	14	5
ENSOART00000027251	ENSOART00000027251	ensembl:	-		5:107515293-107519481	1526	0.139741161063649	0	0.644644726731564	0.25447249854356	0.291611670727541	0.235328277956948	0.238730151726904	0.208672438722163	0.43349976490083	3	0	9	4	5	4	4	3	6
ENSOART00000027256	ENSOART00000027256	ensembl:	-		X:5239682-5523201	1469	3.14526419949034	5.74178993034678	6.32488008684232	2.6434651652653	4.24115047890665	5.37835174737092	2.91374820280792	4.26313009936719	4.65322804757402	65	86	85	40	70	88	47	59	62
ENSOART00000027257	ENSOART00000027257	ensembl:	-		X:5332772-5523201	1585	0.762403489090605	0.618778399463927	1.24137359865478	0.36750003101969	0.954616326662642	1.1895547645197	0.574555564858044	0.602714463388052	1.25208954177666	17	10	18	6	17	21	10	9	18
ENSOART00000027254	ENSOART00000027254	ensembl:	-		X:611570-615597	2005	6.02701181665773	7.28853426562361	2.88949045727009	3.87356641174536	3.10735663516901	5.01523883899801	3.36118011008057	2.91170037937675	2.63942336109527	170	149	53	80	70	112	74	55	48
ENSOART00000027258	ENSOART00000027258	ensembl:	-		X:5332772-5523201	901	0.0788685244063889	0.32656960709654	0.242626181524816	0	0.197538892866496	0	0.101082744599127	0	1.71315001430657	1	3	2	0	2	0	1	0	14
ENSOART00000028072	ENSOART00000028072	ensembl:	-		3:223902470-223906170	2308	0.184787705184686	2.03974288796138	0.899861459551451	0.252377620955896	0.501306623101374	0.778008753527218	0.434032115764218	0.459899106715801	0.382160971252841	6	48	19	6	13	20	11	10	8
ENSOART00000028070	ENSOART00000028070	ensembl:	-		3:223873910-223877790	2005	2.58806364284815	6.99502881326054	7.46901452350173	2.75991606836857	3.7732341091279	5.14960307633901	2.27108367510039	5.18812067598038	3.5192513128674	73	143	137	57	85	115	50	98	64
ENSOART00000028632	ENSOART00000028632	ensembl:	-		6:109890964-109900259	2079	0	0.094368975866093	0.0525748411625443	0	0.171260794440749	0.0863877812630131	0	0.0510556584078917	0.0530319577712576	0	2	1	0	4	2	0	1	1
ENSOART00000028883	ENSOART00000028883	ensembl:	-		15:77844508-77896370	1801	0.0789475132109779	0.163375466959458	0	0	0.0988242878804626	0	0	0	0	2	3	0	0	2	0	0	0	0
ENSOART00000028881	ENSOART00000028881	ensembl:	-		15:74143284-74144441	986	0.14420331774135	0	0	0	0	0	0	0	0.22363780974938	2	0	0	0	0	0	0	0	2
ENSOART00000028886	ENSOART00000028886	ensembl:	-		15:78477112-78505403	362	0.589074618185435	0	0.301942250764999	0	0.245951172886193	0.496133141562995	0	0	0	3	0	1	0	1	2	0	0	0
ENSOART00000028884	ENSOART00000028884	ensembl:	-		15:77938575-78097877	1368	0.935285139399683	1.07543573097216	1.51818731626078	0.92255581617455	1.04095946869553	0.853167364846352	1.93057099163328	2.1725526222516	1.20891930050926	18	15	19	13	16	13	29	28	15
ENSOART00000028885	ENSOART00000028885	ensembl:	-		15:78000681-78005646	3862	0	0.025387393880988	0.0283021995797332	0	0.0460855884186207	0.0232522264689027	0.0235824839160574	0	0.0570965511167501	0	1	1	0	2	1	1	0	2
ENSOART00000027681	ENSOART00000027681	ensembl:	-		2:414748-746557	742	0	0.528686430137949	0.441926259205915	0.392511825583698	0.119992351192455	0.24204878335014	0.490973330910048	0.429156524919165	0	0	4	3	3	1	2	4	3	0
ENSOART00000027680	ENSOART00000027680	ensembl:	-		2:389962-534965	535	0	0	0	0	0	0.167850651631593	0	0.39680266852339	0.20608119664756	0	0	0	0	0	1	0	2	1
ENSOART00000027683	ENSOART00000027683	ensembl:	-		2:421275-470257	4009	0.0531915719089867	0	0	0	0	0	0	0	0.0275014817177462	3	0	0	0	0	0	0	0	1
ENSOART00000027682	ENSOART00000027682	ensembl:	-		2:421275-618848	5478	0.0518995166617897	0.179036831535291	0.139671716582422	0	0	0.0983408450909286	0	0	0.0603797591492029	4	10	7	0	0	6	0	0	3
ENSOART00000027687	ENSOART00000027687	ensembl:	-		2:810371-894848	2940	0.0725323169330366	0.133430384749102	0.223067540361081	0.0330208361205333	0.272466190875015	0.24429316473626	0.0929342376365448	0.180518220799331	0.112503510414739	3	4	6	1	9	8	3	5	3
ENSOART00000027686	ENSOART00000027686	ensembl:	-		2:484129-618945	1578	0	0	0	0.0615217098823625	0.112789950869907	0.170665940139037	0	0.0672653446324505	0.209607300772708	0	0	0	1	2	3	0	1	3
ENSOART00000027402	ENSOART00000027402	ensembl:	-		12:78780120-78935504	4656	0.42747616770854	1.0532256906683	0.469541096095721	0.229358642641333	0.305848916060027	0.655622263074212	0.234712559292875	0.63832731684712	0	28	50	20	11	16	34	12	28	0
ENSOART00000028419	ENSOART00000028419	ensembl:	-		25:43049072-43063689	5088	0.167645449515037	0.250590208165155	0.128895158935059	0.228965231590491	0.367341187638702	0.0705799827363016	0.232684203803349	0.229479530685942	0.0866772328667017	12	13	6	12	21	4	13	11	4
ENSOART00000028418	ENSOART00000028418	ensembl:	-		25:43042266-43072647	3335	0.404975712594177	0.205854436928438	0.393330910106819	0.320208048017406	0.613823271926632	0.242285458155175	0.327682661489544	0.445585005583237	0.198357013864668	19	7	12	11	23	9	12	14	6
ENSOART00000028415	ENSOART00000028415	ensembl:	-		25:35217989-35225370	2639	0	0.0371527530005212	0	0	0	0.0340280782959083	0.0690227759634815	0.201107832190237	0.292449443518421	0	1	0	0	0	1	2	5	7
ENSOART00000028416	ENSOART00000028416	ensembl:	-		25:35218636-35225370	1166	0	0	0	0	0	0.0770155219750447	0	0.0910332022555805	0.189113962618258	0	0	0	0	0	1	0	1	2
ENSOART00000028413	ENSOART00000028413	ensembl:	-		25:35023488-35210222	3397	0.188323531159665	0.375332051558524	0.0643527199157667	0.0285785275815037	0.104813421148754	0.370012674045544	0.134052918580827	0.187479624074195	0.357017321834233	9	13	2	1	4	14	5	6	11
ENSOART00000028412	ENSOART00000028412	ensembl:	-		25:34819686-34822006	569	0.749543099413454	0.689429404503266	2.305375369431	1.87679058020747	0.625749018703544	1.10458918810371	1.12043738169894	2.05200677000013	1.35636921167858	6	4	12	11	4	7	7	11	7
ENSOART00000027941	ENSOART00000027941	ensembl:	-		3:23494277-23495455	746	0.285851222229394	0.262993432742101	0.586075575211419	0	0	0.481381973407912	0.366255574599788	0.28457027836463	0.44337844587042	3	2	4	0	0	4	3	2	3
ENSOART00000027945	ENSOART00000027945	ensembl:	-		3:36956866-36960147	1787	0.159096559750019	0.0548663207433551	0.122331387551124	0	0.0498233489562405	0.150705569971685	0.101931228745175	0.178194818964757	0.30848752156252	4	1	2	0	1	3	2	3	5
ENSOART00000027948	ENSOART00000027948	ensembl:	-		3:43560901-43565217	3537	0.100488968921713	0.0831889216833426	0.0927083076988377	0.10978937878922	0.025172271581793	0.101529814012525	0.102997515277143	0.240078515872224	0.187028736567336	5	3	3	4	1	4	4	8	6
ENSOART00000027949	ENSOART00000027949	ensembl:	-		3:46159070-46463353	806	0	0	0	0	0	0	0.451987855502798	0	0	0	0	0	0	0	0	4	0	0
ENSOART00000029067	ENSOART00000029067	ensembl:	-		8:9505814-9526842	2386	0	0	0.0458101822200041	0.0406878701569019	0	0	0	0	0.0924169658059049	0	0	1	1	0	0	0	0	2
ENSOART00000029066	ENSOART00000029066	ensembl:	-		8:9480680-9488091	3104	0.0228932153640968	0	0	0	0	0	0.0880240524005933	0	0	1	0	0	0	0	0	3	0	0
ENSOART00000029060	ENSOART00000029060	ensembl:	-		16:71451697-71457029	5252	0	0.0373558836301614	0	0	0	0.0341965341290564	0	0	0	0	2	0	0	0	2	0	0	0
ENSOART00000028254	ENSOART00000028254	ensembl:	-		13:78577164-78711934	5020	0	0	0.0435470497119242	0	0.0531906109676325	0	0.0362850808302047	0	0	0	0	2	0	3	0	2	0	0
ENSOART00000028924	ENSOART00000028924	ensembl:	-		20:40764574-40785346	2034	0.174744091974483	0.144660381511299	0.268690006826277	0.477292321506234	0.306284145527503	0.0882990153617523	0.179106298689899	0.104370416745336	0	5	3	5	10	7	2	4	2	0
ENSOART00000028927	ENSOART00000028927	ensembl:	-		20:43081843-43092022	2904	0	0	0.0752776134827339	0	0.0919479569757283	0	0	0	0	0	0	2	0	3	0	0	0	0
ENSOART00000028929	ENSOART00000028929	ensembl:	-		20:44598188-44602546	4188	0.933523766287433	1.14751019593678	1.07012172436015	1.27494489032718	0.956343576687162	1.52210000229603	1.41343986264499	1.44466301058032	0.974063344708321	55	49	41	55	45	71	65	57	37
ENSOART00000028102	ENSOART00000028102	ensembl:	-		21:42373106-42445336	2117	0.268622812876347	0.555955060923917	0.154893379466599	0	0.168186675315218	0.169632003855599	0.129063135876921	0.100278425914036	0.104160075773684	8	12	3	0	4	4	3	2	2
ENSOART00000028101	ENSOART00000028101	ensembl:	-		21:42314105-42314914	732	0.097077241106771	0.133942780284666	0.298642335456092	0.265249339328874	0.364777140788955	0.490588732462162	0.373260462638581	0.580025758633917	0.301238907667881	1	1	2	2	3	4	3	4	2
ENSOART00000028109	ENSOART00000028109	ensembl:	-		21:46172172-46174864	1867	1.63714734642025	1.47091540391763	2.45901064616884	1.50795741169613	0.905757589840922	1.10602841814688	1.65848895606502	1.81929879087318	2.30309810822246	43	28	42	29	19	23	34	32	39
ENSOART00000028280	ENSOART00000028280	ensembl:	-		10:10377389-10458439	647	0	0	0	0	0	0.971423876400323	0	0	0	0	0	0	0	0	7	0	0	0
ENSOART00000027886	ENSOART00000027886	ensembl:	-		24:41480749-41488063	520	2.7339510422918	6.78994177199796	3.99400047816298	1.49355781837489	2.05397590044242	3.10777693441349	1.75128955826923	3.06186674509635	4.66456862411881	20	36	19	8	12	18	10	15	22
ENSOART00000027433	ENSOART00000027433	ensembl:	-		1:9942616-10006272	252	10.7190000119173	15.9571509454704	6.94036096949984	8.86059102567644	10.9488765415201	11.7570522152803	5.78223764921779	6.3181377279766	6.12519112258025	38	41	16	23	31	33	16	15	14
ENSOART00000027437	ENSOART00000027437	ensembl:	-		1:18435711-18438733	2733	0.104026912650305	0.322984869367709	0	0.106565596261655	0.195402024923172	0	0.166621940877815	0.155352673004035	0.201707720831402	4	9	0	3	6	0	5	4	5
ENSOART00000027605	ENSOART00000027605	ensembl:	-		17:34053296-34054454	678	2.72587694035102	3.32708959040506	5.80406240079003	5.87069555452668	2.88800337358483	3.04565642578203	2.28348000071784	2.97455687724208	5.69154927319404	26	23	36	41	22	23	17	19	35
ENSOART00000027604	ENSOART00000027604	ensembl:	-		17:34045215-34048697	3433	0.289881887103257	0.28568708510059	0.66865320075695	0.367624921796325	0.311117817719213	0.470738131632687	0.450975659914564	0.340108316961863	0.353273475756158	14	10	21	13	12	18	17	11	11
ENSOART00000028763	ENSOART00000028763	ensembl:	-		7:96953944-96964043	5736	0	0	0	0.0507747166288536	0.0310290346012401	0.0626065118832466	0.031755771577341	0.0370100117956788	0	0	0	0	3	2	4	2	2	0
ENSOART00000028767	ENSOART00000028767	ensembl:	-		7:99211462-99401354	1316	0	0.596178314836411	0.415285314502012	0.295079812140936	0.47339054103567	0.682235639491193	0.691998913601824	0.564599541648973	0.754012888949849	0	8	5	4	7	10	10	7	9
ENSOART00000028765	ENSOART00000028765	ensembl:	-		7:99078968-99100391	1200	0.0592171170751303	0	0	0	0	0.299259126801919	0.227688882209535	0	0.183755733677408	1	0	0	0	0	4	3	0	2
ENSOART00000028764	ENSOART00000028764	ensembl:	-		7:98582270-98716848	4993	0.0142320329441531	0.0982239769316224	0	0.0777738900014965	0	0.0539376834647307	0.0182406474832393	0.148810934670548	0.0883264091379487	1	5	0	4	0	3	1	7	4
ENSOART00000028769	ENSOART00000028769	ensembl:	-		22:12594454-12624418	458	1.39680138722573	1.07081291882007	2.38679562369516	0.635903437954375	0.77740434856401	1.56817009677861	1.19312951376175	2.08581315386476	1.925824283082	9	5	10	3	4	8	6	9	8
ENSOART00000028497	ENSOART00000028497	ensembl:	-		18:68484090-68486873	2108	0.202319745524789	0.977027344150391	0.362960940910108	0.230268638980949	0.717773661176607	0.638867719333783	0.172818885927541	0.352472958638543	0.209209563959098	6	21	7	5	17	15	4	7	4
ENSOART00000028496	ENSOART00000028496	ensembl:	-		18:68476764-68486873	1537	0	0.191437355884179	0.426687422681573	0	0.289524664626043	0.46728816156448	0.0592554020063851	0	0	0	3	6	0	5	8	1	0	0
ENSOART00000028491	ENSOART00000028491	ensembl:	-		18:68246268-68250581	1843	0.809972041668232	3.83154608946168	0.711751809661553	0.263378345616842	1.15900641875379	1.80248375080968	0.741209080151422	0.921495073944715	1.3161018364307	21	72	12	5	24	37	15	16	22
ENSOART00000028490	ENSOART00000028490	ensembl:	-		18:68243944-68248312	1154	0	0	0	0.504755241911792	0	0.311188000140644	0	0	0	0	0	0	6	0	4	0	0	0
ENSOART00000028493	ENSOART00000028493	ensembl:	-		18:68448607-68552221	5037	0.141127450099702	0.272592633375557	0.108500193346168	0	0	0.552564304811223	0.0723252355638784	0.316095038207287	2.60473259750915	10	14	5	0	0	31	4	15	119
ENSOART00000028492	ENSOART00000028492	ensembl:	-		18:68373351-68376670	3204	3.46098444880564	8.50982986231275	4.50338909042956	3.81780228854256	2.19453828173733	3.05438296462285	5.25838727294312	3.41230251428478	3.81960379900188	156	278	132	126	79	109	185	103	111
ENSOART00000028499	ENSOART00000028499	ensembl:	-		18:68527602-68528688	609	11.0885166128001	28.9884227876577	19.5644762200063	13.5499293046326	17.9760808362355	18.133294043324	7.92555741985153	15.8607043654033	14.3019712403872	95	180	109	85	123	123	53	91	79
ENSOART00000028498	ENSOART00000028498	ensembl:	-		18:68526846-68528688	1285	5.53177906635902	20.0733842792842	10.0377384209932	4.98627473994419	10.8743711943876	11.3886883102459	4.53579420265489	9.82983087708057	6.86393301603287	100	263	118	66	157	163	64	119	80
ENSOART00000028559	ENSOART00000028559	ensembl:	-		9:61523810-61651960	2908	0.0733304717273479	0	0	0.0667684031598129	0.0612044506439866	0.123490698817848	0.0939568977480886	0	0.227483026560752	3	0	0	2	2	4	3	0	6
ENSOART00000027478	ENSOART00000027478	ensembl:	-		1:99473909-99478623	4287	0.215559593640151	0.137270452994627	0.331481614178486	0.090581999714829	0.186855750215196	0.37696384555517	0.169936893989357	0.198077375936565	0.154308523731903	13	6	13	4	9	18	8	8	6
ENSOART00000027479	ENSOART00000027479	ensembl:	-		1:101330815-101357657	736	0.28973507035751	0.133214830391815	0.445528918927703	1.18713495074635	0.362794656328145	0.731944496478406	1.85604393304221	1.58640197300282	0.299601739691425	3	1	3	9	3	6	15	11	2
ENSOART00000027476	ENSOART00000027476	ensembl:	-		1:93355440-93378362	884	0	0.221937896861547	0.370938104446594	0	0	0	0	0	0	0	2	3	0	0	0	0	0	0
ENSOART00000027477	ENSOART00000027477	ensembl:	-		1:95301870-95428638	819	0.0867650067034876	0	0.533836848727373	0	0	0	0	0	0.134619585111654	1	0	4	0	0	0	0	0	1
ENSOART00000027475	ENSOART00000027475	ensembl:	-		1:93070416-93074909	1372	0.310852786855871	0	0.239000936101158	0.283035738176	0.259512530351543	0.130903933852627	0.265526393247271	0.077364951771142	0.803596502962424	6	0	3	4	4	2	4	1	10
ENSOART00000027471	ENSOART00000027471	ensembl:	-		1:85943598-85955777	4271	0	0	0	0	0.0208462478540861	0.0420510880931408	0	0	0	0	0	0	0	1	2	0	0	0
ENSOART00000028511	ENSOART00000028511	ensembl:	-		9:13780055-13901786	3758	0.0378351440375123	0.10438672995273	0.145427214977288	0.232499021753409	0	0.358364330057375	0.0242351125289553	0.112980004076644	0.264044960579564	2	4	5	9	0	15	1	4	9
ENSOART00000028512	ENSOART00000028512	ensembl:	-		9:13780055-13784085	3961	0.197404571230082	0.445704442303433	0	0.0735278400866205	0.157278957839672	0.0679906219488514	0	0.267974536303981	0.0835042465587815	11	18	0	3	7	3	0	10	3
ENSOART00000028513	ENSOART00000028513	ensembl:	-		9:13900241-14065063	2302	0.123503715149124	0.724278153912539	0.47487071922345	0.0843451417848549	0.425296760923222	0.585027433690536	0	0.230548900586461	0.526840939300995	4	17	10	2	11	15	0	5	11
ENSOART00000028514	ENSOART00000028514	ensembl:	-		9:13794773-13797038	1381	0.102957618604613	0.142065967288637	0	0.0702977973891151	0.0644709084611165	0.195011479753368	0	0.153721526183935	0.159671890233808	2	2	0	1	1	3	0	2	2
ENSOART00000028515	ENSOART00000028515	ensembl:	-		9:14080788-14082779	1874	0.531037629896202	1.57005938604641	0.291630455648158	0.414434399975957	0.332434339382573	0.479093970955395	0.291597287781688	0.849610836419478	0.352999274940591	14	30	5	8	7	10	6	15	6
ENSOART00000028516	ENSOART00000028516	ensembl:	-		9:14117786-14149052	3338	0	0.235042139701833	0	0	0	0.134485036184903	0	0	0	0	8	0	0	0	5	0	0	0
ENSOART00000028517	ENSOART00000028517	ensembl:	-		9:14198547-14286827	5998	0.402937489232614	0.70311675034933	0.601407973225217	0.210412863709034	0	0.628690997587103	0.379579677395644	0	0.459542515031863	34	43	33	13	0	42	25	0	25
ENSOART00000028518	ENSOART00000028518	ensembl:	-		9:14281300-14286827	5490	0	0	0	0.229882760751691	0.616047147625865	0	0	0.425352222998206	0	0	0	0	13	38	0	0	22	0
ENSOART00000028519	ENSOART00000028519	ensembl:	-		9:14238959-14244600	5403	0.0657837281280953	0	0.0809202996682803	0.0359360570773156	0.0329414292934875	0.13293020624183	0.101138870498405	0.0785820572496812	0.102029835467744	5	0	4	2	2	8	6	4	5
ENSOART00000027861	ENSOART00000027861	ensembl:	-		24:35522356-35531832	5109	0	0.0575923303961603	0	0	0	0	0	0	0	0	3	0	0	0	0	0	0	0
ENSOART00000027860	ENSOART00000027860	ensembl:	-		24:35123737-35257272	1062	0	0	0	0	0	0	0.343034097490824	0	0	0	0	0	0	0	0	4	0	0
ENSOART00000027863	ENSOART00000027863	ensembl:	-		24:35525094-35531832	4938	0.0431844900330351	0	0	0.0196600360863443	0.0180304424027545	0	0	0	0.0223275496570362	3	0	0	1	1	0	0	0	1
ENSOART00000027862	ENSOART00000027862	ensembl:	-		24:35523580-35531832	5040	0	0	0.0216871219795495	0	0.0176655405922226	0.0356349597709929	0	0.063181377279766	0.0218756825806438	0	0	1	0	1	2	0	3	1
ENSOART00000027865	ENSOART00000027865	ensembl:	-		24:37647345-37673039	1130	0.0628854340620853	0.0867664736003323	0.19345680491492	0	0	0.158938227651154	0.161195668820909	0.37573350028321	0.390277664447591	1	1	2	0	0	2	2	4	4
ENSOART00000027867	ENSOART00000027867	ensembl:	-		24:38605284-38610715	5395	0.0263548602952681	0.145425516649623	0.0810402926983723	0	0.0824836718313676	0.232981103564914	0.0337629482423777	0.157397166012985	0.245234714082916	2	8	4	0	5	14	2	8	12
ENSOART00000027866	ENSOART00000027866	ensembl:	-		24:38600242-38735793	1116	8.78989614988755	14.0612196065359	6.95430602212755	7.82913372535226	7.33720102222615	12.9523873489428	5.79385256456998	6.18226379834269	7.40939670660396	138	160	71	90	92	161	71	65	75
ENSOART00000027869	ENSOART00000027869	ensembl:	-		24:38964478-39079933	1779	0.119867909939926	0.165395849350187	0.368644501777166	0.327424142308155	0.600375192934266	0.151383279111524	0.30716881242433	0.715984578954515	0.247899809345575	3	3	6	6	12	3	6	12	4
ENSOART00000027868	ENSOART00000027868	ensembl:	-		24:38785016-38838983	4352	0.343009759373748	1.21695887348411	0.678149128414565	0.356916390420471	0.511278298333647	0.618903103104602	0.25110792189054	0.463407528210048	0.532013383349112	21	54	27	16	25	30	12	19	21
ENSOART00000028068	ENSOART00000028068	ensembl:	-		3:223796392-223802814	1930	1.32590856565295	4.16699647980736	2.03894005582157	2.41445616234698	2.72083777713399	3.67501384141988	1.98182297694599	1.59492057050269	1.48527950537179	36	82	36	48	59	79	42	29	26
ENSOART00000028069	ENSOART00000028069	ensembl:	-		3:223831336-223885365	2791	0.38202259366379	2.10844982063447	0.90078560650393	0.313053143586282	0.66966390637969	0.93287932858772	0.228423099314474	0.494403898169147	0.632051251631355	15	60	23	9	21	29	7	13	16
ENSOART00000028063	ENSOART00000028063	ensembl:	-		3:223569080-223570263	1079	0	0.181828638392593	0	0	0.247466975956918	0	0	0.0983732287581157	0	0	2	0	0	3	0	0	1	0
ENSOART00000028066	ENSOART00000028066	ensembl:	-		3:223872166-223873132	759	0.749241758707808	1.67984582232452	0.86405608519312	0	1.64169961884423	1.5377245785373	1.67980603667359	1.67817729375505	0.435784348642073	8	13	6	0	14	13	14	12	3
ENSOART00000029070	ENSOART00000029070	ensembl:	-		8:27791050-27846901	3774	0.075332684757097	0.0519854533189209	0.173772805686693	0.154342222884528	0.0943431880345301	0.0475888175002131	0.0241323669538457	0.112501021547437	0	4	2	6	6	4	2	1	4	0
ENSOART00000028304	ENSOART00000028304	ensembl:	-		10:41464515-41486325	611	0	0	0	0.15888912961435	0	0.587742965895749	0	0	0.180447528979451	0	0	0	1	0	4	0	0	1
ENSOART00000028308	ENSOART00000028308	ensembl:	-		10:42542587-42600997	3165	0	0	0.0690698861149635	0	0	0	0.115103384371329	0.100611103156405	0.0696704203516237	0	0	2	0	0	0	4	3	2
ENSOART00000028766	ENSOART00000028766	ensembl:	-		7:99135923-99257062	1264	0.112487714630515	0.465568379737315	0	0.0768047928752911	0.211247521406262	0.0710443818219162	0	0.419876241416166	0.261677468844409	2	6	0	1	3	1	0	5	3
ENSOART00000027368	ENSOART00000027368	ensembl:	-		12:40094869-40098008	834	0	0	0.393176599917013	0	0	0.107673979164151	0	0.127271839124708	0	0	0	3	0	0	1	0	1	0
ENSOART00000027367	ENSOART00000027367	ensembl:	-		12:38429229-38537201	1520	0.280585541819905	0.322652840012888	0.431459584645775	0.76643098574501	0	0.118158024503819	1.55775951177821	0.628488437151356	0.145070316061111	6	5	6	12	0	2	26	9	2
ENSOART00000027364	ENSOART00000027364	ensembl:	-		12:28788196-28812560	4797	0.163001773325486	0.245352692094211	0.159500034070983	0.182141197362792	0.204092796257089	0.168443194277154	0.170855746803458	0.199145804559112	0.0689514948132861	11	12	7	9	11	9	9	9	3
ENSOART00000027361	ENSOART00000027361	ensembl:	-		12:25094747-25096236	1147	0	0.17104891092032	0.190589528817663	0.169278567034643	0.310419521920067	0.313087142251354	0.158806543825308	0.092541162885795	0.0961233131703963	0	2	2	2	4	4	2	1	1
ENSOART00000027169	ENSOART00000027169	ensembl:	-		4:111728443-111827559	1000	2.20357404863409	1.86348141113227	2.29548643819861	2.03870642208173	2.40306569682074	2.96277715825063	2.09456779925144	2.33518370426015	3.74861696701911	31	19	21	21	27	33	23	22	34
ENSOART00000027164	ENSOART00000027164	ensembl:	-		4:101364818-101365737	715	0.596489543449308	0.27439594521064	0	0	0	0.376658536418742	0.382135186925093	0	0	6	2	0	0	0	3	3	0	0
ENSOART00000027165	ENSOART00000027165	ensembl:	-		4:103756746-103760870	916	0	0	0.238653045364475	0	0.194304085668901	0.0980350421647403	0.198854918960292	0	0.601820088463125	0	0	2	0	2	1	2	0	5
ENSOART00000027160	ENSOART00000027160	ensembl:	-		4:94319240-94326518	4179	7.99453625106791	24.4782673578646	15.9295216682003	3.69368749770388	7.36903543333979	15.6404220567276	2.07025192969499	8.61050046684081	23.1109546352713	470	1043	609	159	346	728	95	339	876
ENSOART00000027161	ENSOART00000027161	ensembl:	-		4:94322672-94326518	3060	0	0	3.03635583253966	0	0	0	0	0	0	0	0	85	0	0	0	0	0	0
ENSOART00000027162	ENSOART00000027162	ensembl:	-		4:95314176-95324251	1457	0	0	0.150038565239437	0	0.0611079784384364	0	0	0	0	0	0	2	0	1	0	0	0	0
ENSOART00000027163	ENSOART00000027163	ensembl:	-		4:99416840-99542254	1233	0.0576322307300538	0.079518341580191	0.0886480898434142	0.236207440862209	0.216558691855243	0	0.0738650063940096	0.172173096236832	0.0894188485048212	1	1	1	3	3	0	1	2	1
ENSOART00000028599	ENSOART00000028599	ensembl:	-		6:30598777-30604117	4580	0	0	0	0.0211967812651458	0.0194398088613104	0.0196070084329481	0.0198854918960292	0	0.024072803538525	0	0	0	1	1	1	1	0	1
ENSOART00000028590	ENSOART00000028590	ensembl:	-		6:22082295-22087996	5089	0.977760383597447	0.77088918306176	1.97612339534151	1.31629137657917	0.979406571587953	0.846828514562044	1.50321019670103	2.12750492079749	1.03989857319631	70	40	92	69	56	48	84	102	48
ENSOART00000028592	ENSOART00000028592	ensembl:	-		6:23471881-23524993	636	0.223560489454357	0.308479718279257	0.343720423826823	0.457930463180981	0.279846764894203	0.423444738269498	0.286401109697528	0.333788408270462	0.52006339720021	2	2	2	3	2	3	2	2	3
ENSOART00000028595	ENSOART00000028595	ensembl:	-		6:25575418-25576475	1017	0.209680444231197	0.48223433315594	0.322428008191533	0.572750785807481	0.262553458266976	0.264809098858801	0.626872045414648	1.25244500094403	0.433641849386213	3	5	3	6	3	3	7	12	4
ENSOART00000028596	ENSOART00000028596	ensembl:	-		6:27631199-27684548	3133	0	0	0	0	0.0568089825958229	0	0	0	0.0703820237513211	0	0	0	0	2	0	0	0	2
ENSOART00000028837	ENSOART00000028837	ensembl:	-		26:31708917-31714456	3023	0.0705408573546568	0.227100412555852	0.144628640128256	0.0642284209026583	0.117780744837022	0.118792905114887	0.120510159290524	0.0702247527820092	0.255300721615981	3	7	4	2	4	4	4	2	7
ENSOART00000027198	ENSOART00000027198	ensembl:	-		5:9963163-9966407	1273	0.446719948828929	0.231138425761181	0.858721441989303	0.381308948131846	0	0.56419631133119	0.286176128464458	0.333526202136706	0.259827431751244	8	3	10	5	0	8	4	4	3
ENSOART00000027731	ENSOART00000027731	ensembl:	-		2:57856955-57927820	2477	0	0	0	0.0391930796101607	0.0359444184839733	0	0	0.214260625413821	0	0	0	0	1	1	0	0	5	0
ENSOART00000028389	ENSOART00000028389	ensembl:	-		11:52845989-52980516	2770	0.153967517532944	0.212447087360277	0	0.175236928148679	0.0963959808871895	0.356542310539102	0.0986377829066576	0.191596956371854	0	6	6	0	5	3	11	3	5	0
ENSOART00000028388	ENSOART00000028388	ensembl:	-		11:52833764-52836011	2137	0.0665346145498227	0.0918077214906914	0.0511479151974402	0	0.0416632309708946	0	0	0	0.154777875816253	2	2	1	0	1	0	0	0	3
ENSOART00000028380	ENSOART00000028380	ensembl:	-		11:42168058-42214877	2005	0.496341405698495	1.27182342059283	0.490637333163275	0.62945454190862	0.710240674900492	0.761263516010682	0.635896649294392	0.952920124159662	0.659870963829094	14	26	9	13	16	17	14	18	12
ENSOART00000028383	ENSOART00000028383	ensembl:	-		11:47855123-47855701	537	1.72086401850154	5.66189622925178	2.23920947938419	2.7117669886695	2.48619056850573	3.00939293462759	2.71345230466086	3.95324818733731	2.05313668913305	13	31	11	15	15	18	16	20	10
ENSOART00000028382	ENSOART00000028382	ensembl:	-		11:43574625-43576847	1355	0.891815151445468	1.80956445986734	0.806754535536813	0.859760220171525	1.11665452233232	1.12644527645861	0.80651046204253	0.548349075136567	1.22051778826322	17	25	10	12	17	17	12	7	15
ENSOART00000028385	ENSOART00000028385	ensembl:	-		11:51697015-51699134	494	0.431670064338315	0.992777969270426	0.663783976378115	0.393041531151287	0	0.363563152319442	0	0.85947136704459	0.446370203264958	3	5	3	2	0	2	0	4	2
ENSOART00000028384	ENSOART00000028384	ensembl:	-		11:50219648-50234794	1203	0.413644184845445	0.244587876969229	0.181717530801213	0.0806993002446949	0.221959157986297	0.223866046167415	0.151414053007172	0.264700034488795	0.549892469857579	7	3	2	1	3	3	2	3	6
ENSOART00000028386	ENSOART00000028386	ensembl:	-		11:51725046-51728360	2574	0.635159111800647	0.990678305473432	1.06165455217806	0.792038237016988	0.726119643630813	0.697608470528679	0.424561645713919	0.494847150722643	0.728169574013037	23	26	25	21	21	20	12	12	17
ENSOART00000028094	ENSOART00000028094	ensembl:	-		21:39812949-39818028	3449	0.0412248394586753	0.0568840535881726	0.063382484648843	0	0.051604100455991	0.0520731218456956	0.0528127299993122	0	0	2	2	2	0	2	2	2	0	0
ENSOART00000028096	ENSOART00000028096	ensembl:	-		21:40296816-40409943	1259	0.282310947637886	0.0778761836126891	0.0868173906091578	0.23132944764345	0.0707182879942826	0.07132652789746	0.361697986035798	0	0.262716696282235	5	1	1	3	1	1	5	0	3
ENSOART00000028141	ENSOART00000028141	ensembl:	-		23:2183649-2368997	526	0.135096084582046	0.559390144475253	0	0	0	0	0	0	0	1	3	0	0	0	0	0	0	0
ENSOART00000028859	ENSOART00000028859	ensembl:	-		15:43200726-43213145	948	0.0749583760444688	0	0	0	0	0.189451684858443	0	0	0.116301097264182	1	0	0	0	0	2	0	0	1
ENSOART00000028858	ENSOART00000028858	ensembl:	-		15:32664041-32681917	3013	0.825736140464664	1.10676318987793	1.45116717120589	2.28767651237973	0.531729572633618	0.74495693791106	1.7833115784907	1.44438541886169	1.24414768238271	35	34	40	71	18	25	59	41	34
ENSOART00000028855	ENSOART00000028855	ensembl:	-		15:29002398-29009705	1023	12.0904473460261	36.7190272015375	25.0033055253163	15.1837744976529	21.6636200641177	25.8901882248268	10.860740746354	18.4690819091094	26.7277510248859	174	383	234	160	249	295	122	178	248
ENSOART00000028854	ENSOART00000028854	ensembl:	-		15:28859997-29026216	2427	0.0585844545912531	0	0.0450362978067283	0.120001555246438	0.110019310695309	0	0.11257793928778	0.131204837861566	0	2	0	1	3	3	0	3	3	0
ENSOART00000028856	ENSOART00000028856	ensembl:	-		15:29716481-29740207	894	0.477058191908563	1.75530446883478	0.73357781729483	1.30310413683715	0.696847821032373	1.90810302518783	1.12052139058592	1.18730104955265	0.739955974539896	6	16	6	12	7	19	11	10	6
ENSOART00000028850	ENSOART00000028850	ensembl:	-		15:19931320-19950311	919	0.541473290934788	0.640346498354696	1.18950206273382	0.845103444564683	0.581103083911893	1.07467051163581	1.18914219376238	0.924001861414641	1.31968209169847	7	6	10	8	6	11	12	8	11
ENSOART00000027501	ENSOART00000027501	ensembl:	-		1:123660445-123707865	1221	0.407546236174505	0.321282007503979	0.358077296566518	0	0.510222728913138	0.808863390821713	0	0	0.180595315653472	7	4	4	0	7	11	0	0	2
ENSOART00000027508	ENSOART00000027508	ensembl:	-		1:134928382-134934170	1484	0	0	0.220963129602958	0.196255912791849	0	0.302500708076283	0	0.0715260874865275	0.148589542057203	0	0	3	3	0	5	0	1	2
ENSOART00000028464	ENSOART00000028464	ensembl:	-		18:51437703-51457341	1222	0	0	0	0	0.145648561761631	0.367357652033719	0.149059824687093	0	0.180447528979451	0	0	0	0	2	5	2	0	2
ENSOART00000028467	ENSOART00000028467	ensembl:	-		18:57401192-57433200	844	0	0.34862466349998	0	0	0	0.319088689027726	0	0	0	0	3	0	0	0	3	0	0	0
ENSOART00000028460	ENSOART00000028460	ensembl:	-		18:43886774-44003096	1779	0.199791727417706	0.275678649139736	0.43008525207336	0.109141380769385	0.150093798233567	0.353294686920185	0.204779208282887	0.298326907897715	0.0619749523363938	5	5	7	2	3	7	4	5	1
ENSOART00000028461	ENSOART00000028461	ensembl:	-		18:44025256-44026309	879	0.0808424806486421	0.111542793138084	0.124349368346905	0.220890234799472	0.303773455128003	0	0.207225376299918	0.241512431922655	0.125430534933384	1	1	1	2	3	0	2	2	1
ENSOART00000028463	ENSOART00000028463	ensembl:	-		18:48601602-48649268	2490	0	0	0	0	0.0714789327199651	0.108156969292932	0.0365765272625758	0.0852567982570336	0	0	0	0	0	2	3	1	2	0
ENSOART00000028378	ENSOART00000028378	ensembl:	-		11:40814530-41000908	2664	6.27050119810913	13.4377741748115	2.33882910883418	5.79426428412332	7.45036255505239	14.7277673322933	4.34152799902444	5.37899703390715	1.53129778064506	235	365	57	159	223	437	127	135	37
ENSOART00000028269	ENSOART00000028269	ensembl:	-		10:8058501-8151851	1155	0	0	0	0.0840530373977212	0.0770859953115167	0	0.0788532925400986	0	0	0	0	0	1	1	0	1	0	0
ENSOART00000028262	ENSOART00000028262	ensembl:	-		10:5181921-5228820	1032	0	0.0950059255507515	0.211827703056065	0.0940709866224496	0.0862735703341103	0.0870155994407966	0.176503009464756	0	0	0	1	2	1	1	1	2	0	0
ENSOART00000028260	ENSOART00000028260	ensembl:	-		10:41343990-41425783	5327	0.0266912842674998	0.0368299419608799	0	0.0364487547191169	0.0334114027544046	0	0	0	0.0413941956847924	2	2	0	2	2	0	0	0	2
ENSOART00000028266	ENSOART00000028266	ensembl:	-		10:6208052-6314451	1704	0.0834415911343728	0	0.192435026015721	0	0.104449848868963	0.105399176787444	0.160344283246151	0.12458299745306	0.517621785006782	2	0	3	0	2	2	3	2	8
ENSOART00000028267	ENSOART00000028267	ensembl:	-		10:7669506-7836271	481	0.295601811419899	0.611723941775432	0.908965445130392	0	0.370026075826846	0.933287007869448	0.568038791375138	1.10337540363832	0	2	3	4	0	2	5	3	5	0
ENSOART00000028265	ENSOART00000028265	ensembl:	-		10:6138866-6153578	2891	0	0	0	0.134322045236068	0	0	0	0	0	0	0	0	4	0	0	0	0	0
ENSOART00000027205	ENSOART00000027205	ensembl:	-		5:17857816-17992134	3117	0.091211277598102	0.220251699440597	0.175333806186926	0.0311457357056041	0.17132939817614	0.23042088685422	0	0.0681069706961866	0.282973218367519	4	7	5	1	6	8	0	2	8
ENSOART00000027204	ENSOART00000027204	ensembl:	-		5:16934931-16941361	524	0.678300540221563	0.187110906809877	0.41718738464477	0.370539153413618	0.679487006950986	0.685326244584547	0.521424921090537	0.405132495534377	0.420814657276506	5	1	2	2	4	4	3	2	2
ENSOART00000027207	ENSOART00000027207	ensembl:	-		5:18995135-19000910	5589	0.432424236968549	0.544003985526607	0.430271879222676	0.399511350594107	0.382188017492079	0.562243219806125	0.309599310476709	0.455801240279149	0.512898451488201	34	31	22	23	24	35	19	24	26
ENSOART00000027206	ENSOART00000027206	ensembl:	-		5:18848127-18849701	1299	0.547235539763047	1.88757493696708	0.841533791880202	0.373676898361694	0.342570754064841	1.03674607571641	0.210336149847145	0.408563178714422	0.679005020516979	10	25	10	5	5	15	3	5	8
ENSOART00000027200	ENSOART00000027200	ensembl:	-		5:14569424-14634733	1315	0.0540384338328185	0	0.166240448329931	0.369130259294175	0.135347941043888	0.204799128166845	0.0692589755770447	0.161436827117881	0.25152876092725	1	0	2	5	2	3	1	2	3
ENSOART00000027203	ENSOART00000027203	ensembl:	-		5:16405363-16601603	885	0.16066041954008	0.110786570811724	0.123506321781841	0.109696336942789	0	0.202938075983959	0.102910229247247	0.11993752975142	0.124580158425361	2	1	1	1	0	2	1	1	1
ENSOART00000027202	ENSOART00000027202	ensembl:	-		5:15627785-15652591	913	1.71285762681786	3.33016240428062	3.23253560444708	3.40262898381136	2.43711188866159	3.4418152853192	4.28914994347161	3.25525956981401	2.53594988426652	22	31	27	32	25	35	43	28	21
ENSOART00000029113	ENSOART00000029113	ensembl:	-		8:88321288-88363202	1913	0	0	0.228548028806962	0.101496349392962	0.0930384435299075	0.234663382532778	0.190435029553192	0.499373980381632	0.230535159867108	0	0	4	2	2	5	4	9	4
ENSOART00000028659	ENSOART00000028659	ensembl:	-		6:116768783-116774530	5343	0.0931338114110182	0.110140077107985	0.0613717545069791	0.0181698031432469	0	0.151230021139343	0.119320394944169	0.0397322529777304	0.0825404755429119	7	6	3	1	0	9	7	2	4
ENSOART00000028658	ENSOART00000028658	ensembl:	-		6:116483192-116488306	3081	0.738298597675075	3.94727405370176	3.79622195015579	1.48095395492869	2.13768748408286	3.29287697851798	0.798075303728237	2.37714548986383	3.54267098004696	32	124	107	47	74	113	27	69	99
ENSOART00000028657	ENSOART00000028657	ensembl:	-		6:116483192-116488323	2652	0	0.184929229569981	0.206076724692552	0	0.201370186317885	0.169272643584165	0	0.360219617070159	0.207868477010642	0	5	5	0	6	5	0	9	5
ENSOART00000028655	ENSOART00000028655	ensembl:	-		6:116388120-116445520	3210	0.287882859169883	0.0611193460515911	0.0340508083417226	0.302433826150679	0.0554462749136178	0.25172025013941	0.283697996978193	0.0992006671308475	0.20608119664756	13	2	1	10	2	9	10	3	6
ENSOART00000028654	ENSOART00000028654	ensembl:	-		6:116370887-116371762	777	0.0914550070658383	0	0.422019670953396	0	0.11458729032793	0	0	0	0.567585277768054	1	0	3	0	1	0	0	0	4
ENSOART00000028653	ENSOART00000028653	ensembl:	-		6:116168539-116169834	374	7.03225687754103	13.6363954988696	5.84541000914887	5.97023780339696	8.32909618558419	8.88229292177069	5.3569311400204	8.23047246275454	5.60111059872312	37	52	20	23	35	37	22	29	19
ENSOART00000028652	ENSOART00000028652	ensembl:	-		6:115989554-115993085	2353	4.07831665596744	5.58534429349997	5.06364896641897	7.96289113111476	7.11121286581006	4.88401492697387	4.52832979987298	6.85682457859701	4.45131981670162	135	134	109	193	188	128	117	152	95
ENSOART00000028651	ENSOART00000028651	ensembl:	-		6:115927210-115929618	2214	0	0	0	0	0	0.0405601168125122	0.12340860824365	0.143827525514914	0.0497983018095955	0	0	0	0	0	1	3	3	1
ENSOART00000028650	ENSOART00000028650	ensembl:	-		6:115762021-115765199	3044	9.2240193554564	22.1994936810569	11.2397542152787	7.55856050987688	7.89451882007165	12.6532394305438	7.18025243001543	10.0426377510906	9.56193966549323	395	689	313	237	270	429	240	288	264
ENSOART00000028172	ENSOART00000028172	ensembl:	-		23:30782707-30785956	2357	0	0	0	0	0.0755123217958053	0	0	0	0.140331065175789	0	0	0	0	2	0	0	0	3
ENSOART00000027588	ENSOART00000027588	ensembl:	-		17:5211615-5227102	2660	0.0534528087567561	0	0	0	0.0334715505957902	0	0	0	0	2	0	0	0	1	0	0	0	0
ENSOART00000027582	ENSOART00000027582	ensembl:	-		1:266854180-266866713	5407	0.0788773855310256	0	0.0808604363062176	0.197502097306833	0.115217671907331	0.0498078145994823	0.0842200415052838	0.215940790110981	0.203908711312085	6	0	4	11	7	3	5	11	10
ENSOART00000028753	ENSOART00000028753	ensembl:	-		7:92313706-92438962	1220	0	0	0.268778101910483	0	0.145887329895666	0.294353239477297	0.298608370110865	0.174007727590175	0	0	0	3	0	2	4	4	2	0
ENSOART00000028750	ENSOART00000028750	ensembl:	-		7:85197665-85199917	1065	2.1358666473586	1.3814047699248	2.2580183408221	1.0027172207869	2.00567965235984	2.52907634245186	1.11164059056473	1.19599677554937	1.44934099801899	32	15	22	11	24	30	13	12	14
ENSOART00000027919	ENSOART00000027919	ensembl:	-		3:2668566-2670572	1946	4.74863803104588	9.07191648390727	8.25720787013019	6.53527483220052	6.54034787979714	9.96551173692569	5.28821058970497	7.80000298508155	10.7079432770768	130	180	147	131	143	216	113	143	189
ENSOART00000027918	ENSOART00000027918	ensembl:	-		3:2134758-2161571	1128	0	0.260850368788992	0.0968999067171362	0	0	0	0	0	0.195484823061072	0	3	1	0	0	0	0	0	2
ENSOART00000027915	ENSOART00000027915	ensembl:	-		3:2018023-2203956	712	0.798700133229251	1.23977197750274	1.22812466041494	1.22715073560297	0.624999170688523	1.38710983173218	1.02320149512974	1.19263723404502	1.85820404842322	8	9	8	9	5	11	8	8	12
ENSOART00000027914	ENSOART00000027914	ensembl:	-		3:1984342-1985408	851	0	7.14544733222979	3.59648425574279	0.798553240141687	4.18351056361411	5.90813355729748	0	4.49025816437162	3.88672527167255	0	62	28	7	40	56	0	36	30
ENSOART00000027917	ENSOART00000027917	ensembl:	-		3:2115092-2161571	1386	0.102586198624077	0.14155346379914	0.0788622617438165	0.0700441978314343	0.0642383294262639	0.12958167189452	0.0657110771167488	0.0765834876118375	0.159095873313773	2	2	1	1	1	2	1	1	2
ENSOART00000027916	ENSOART00000027916	ensembl:	-		3:2080051-2161571	1435	4.30956942323068	8.47494868254712	4.34190992748031	2.23253067624679	3.72136942700803	6.19402154500432	2.28464461895671	2.21905325080154	5.07080540955542	87	124	57	33	60	99	36	30	66
ENSOART00000027911	ENSOART00000027911	ensembl:	-		3:1797576-1804422	875	0.731125754685009	1.00882016912223	0.374753467806616	0.443800037459968	0.813732887528849	0.820825033513834	0.10408634615293	0.727849466262904	1.13403538498057	9	9	3	4	8	8	1	6	9
ENSOART00000027910	ENSOART00000027910	ensembl:	-		3:1759107-1790250	689	3.61094773761979	6.83269460872986	2.85569978790685	1.5499184907664	3.61698116314303	3.38803389339467	0.793110765316231	1.84867426119025	5.92072175274085	35	48	18	11	28	26	6	12	37
ENSOART00000027913	ENSOART00000027913	ensembl:	-		3:1984342-1985408	1016	1.18937945886674	1.15842211021253	0.537908930988827	0	0.437991544813217	0	1.25489447031029	0.104473143533471	0.868137324460193	17	12	5	0	5	0	14	1	8
ENSOART00000027912	ENSOART00000027912	ensembl:	-		3:1797576-1798909	1027	0.415277530249518	1.14601447319954	1.38370173318712	0.567173855079073	0.95329420023881	0.611987583282385	0.0886811615227009	1.0335415173321	0.644129154078546	6	12	13	6	11	7	1	10	6
ENSOART00000028510	ENSOART00000028510	ensembl:	-		9:13778615-13793928	1567	0.816509298467623	4.005723535771	2.99953795224898	1.23907157874114	1.81758213978804	2.29182412653583	0.290604827325507	1.96438844994907	2.39222525017174	18	64	43	20	32	40	5	29	34
ENSOART00000028952	ENSOART00000028952	ensembl:	-		14:22034554-22038508	3777	0.677522777789301	0.36352901623317	0.289423456619641	0.565471983128434	0.730504868536685	0.713123194257672	0.337562293310896	0.16861749615569	1.37193285644416	36	14	10	22	31	30	14	6	47
ENSOART00000028953	ENSOART00000028953	ensembl:	-		14:23102469-23275357	3437	0.0413687725612369	0.199745285759774	0	0	0	0.078356372865697	0.0264985606295647	0.0926488628135061	0.128313576033104	2	7	0	0	0	3	1	3	4
ENSOART00000028958	ENSOART00000028958	ensembl:	-		14:39504568-39509671	1619	0.482964488352288	0.18174133168251	0.472589044742747	0.179891151688143	0.604714727390524	0.610019888939661	0.225016807619058	0.262247594391617	0.27239886400604	11	3	7	3	11	11	4	4	4
ENSOART00000028959	ENSOART00000028959	ensembl:	-		14:39636523-39642618	3864	0.0551876324490496	0	0	0	0	0.0464803823099907	0.0707108329843275	0	0	3	0	0	0	0	2	3	0	0
ENSOART00000027284	ENSOART00000027284	ensembl:	-		X:62854167-62857317	528	18.5786441349896	29.5346116775107	28.9834912953632	19.3059320272891	20.7337750554308	27.2067303506185	19.1452778443148	21.7116303502243	26.7276472814361	138	159	140	105	123	160	111	108	128
ENSOART00000027287	ENSOART00000027287	ensembl:	-		X:76828385-76859568	995	0	0.0985388092144478	0.109852356559728	0	0	0	0.0915332189787074	0.106678104351766	0.110807477594417	0	1	1	0	0	0	1	1	1
ENSOART00000027283	ENSOART00000027283	ensembl:	-		X:62577683-62580286	1828	38.0303730795562	40.2395997427223	111.701291842431	58.6312319727169	50.4904611067813	55.4015964964726	68.7007830454694	94.5900616407565	108.141001033951	978	750	1868	1104	1037	1128	1379	1629	1793
ENSOART00000027282	ENSOART00000027282	ensembl:	-		X:56341563-56344597	1799	16.6743654332241	11.2306589416188	27.5248564108634	28.9247614741264	29.2885300358321	17.6669233267356	33.5120110707785	37.702505464818	26.781626968121	422	206	453	536	592	354	662	639	437
ENSOART00000027289	ENSOART00000027289	ensembl:	-		X:77196546-77198409	1296	2.41333181062455	4.01084724671729	4.47023793736615	3.0712435076922	3.7085011576685	3.18672805222974	3.72427813942097	2.70275891696777	2.9775234623654	44	53	53	41	54	46	53	33	35
ENSOART00000027288	ENSOART00000027288	ensembl:	-		X:77185295-77187295	1381	0.411784572671417	0.355128397407379	0.395738938366871	0.14059559477823	0.193350374408048	0.325062310488924	0	0.307443052367869	0.479015670701424	8	5	5	2	3	5	0	4	6
ENSOART00000027424	ENSOART00000027424	ensembl:	-		1:5382033-5387322	4956	6.00967280116767	9.6177446620579	8.82239473694848	6.9735713109296	8.36876824821165	9.36588962586614	7.1848763714773	9.78780421365387	7.58594389563041	419	486	400	356	466	517	391	457	341
ENSOART00000028549	ENSOART00000028549	ensembl:	-		9:42348643-42370801	908	0	0	0.120377857683843	0	0	0	0	0	0.242848987238865	0	0	1	0	0	0	0	0	2
ENSOART00000028543	ENSOART00000028543	ensembl:	-		9:39999844-40014762	5104	0	0	0.0428303662919003	0	0	0	0	0.0623891343044711	0	0	0	2	0	0	0	0	3	0
ENSOART00000028177	ENSOART00000028177	ensembl:	-		23:36774202-36856293	4294	0.0331123594068401	0	0.0763645282558894	0.0904343346011812	0.0414491249354246	0	0.0848398256952155	0.0494386184583171	0.0513523242694199	2	0	3	4	2	0	4	2	2
ENSOART00000027567	ENSOART00000027567	ensembl:	-		1:251394380-251395753	992	0.071633609365077	0	0	0	0	0.271482715261492	0	0	0	1	0	0	0	0	3	0	0	0
ENSOART00000028037	ENSOART00000028037	ensembl:	-		3:216911013-216913954	1768	0.12061369444747	0.332849791848397	0.185469052223297	0	0.25169649860307	0.152325143404638	0	0.120073205690053	0.124721086206385	3	6	3	0	5	3	0	2	2
ENSOART00000028036	ENSOART00000028036	ensembl:	-		3:216901260-216903932	2550	0.111492373440504	0.230775855681555	0.385775628624458	0.114213244934551	0.2094249937706	0.422518548555378	0.0357159030916917	0.208126889862759	0.302656502527495	4	6	9	3	6	12	1	5	7
ENSOART00000028035	ENSOART00000028035	ensembl:	-		3:212520516-212568418	5267	1.53854198190561	0.949680235695624	1.22446305970915	0.866303234314657	0.929403022256748	1.24436407148894	0.847246481050401	0.70534744333591	2.19792859896779	114	51	59	47	55	73	49	35	105
ENSOART00000028727	ENSOART00000028727	ensembl:	-		7:17265985-17297585	4716	0.180869390825384	0.291146966563334	0.625806829274849	0.576394238643406	0.169858057924628	0.114230523623432	0.579324993519538	0.720235547616671	0.280543104851004	12	14	27	28	9	6	30	32	12
ENSOART00000028726	ENSOART00000028726	ensembl:	-		7:17198407-17208011	1036	0.0685912552993787	0	0	0.281123334539676	0	0.173359263750776	0	0.204912574961403	0	1	0	0	3	0	2	0	2	0
ENSOART00000028725	ENSOART00000028725	ensembl:	-		7:17185970-17191154	1905	0	0	0	0.203845161562977	0	0	0	0.055719009884518	0	0	0	0	4	0	0	0	1	0
ENSOART00000028721	ENSOART00000028721	ensembl:	-		7:15566220-15570337	1524	0.746291988004234	0.450475424643269	1.07589755218965	0.764419355861165	0.350415836033484	0.17671315849042	0.5377920061786	0.487541336489533	0.795792547421844	16	7	15	12	6	3	9	7	11
ENSOART00000028720	ENSOART00000028720	ensembl:	-		7:15566220-15575434	457	0.311125757752672	0	0	0.637294911560403	0	0	0	0	0.482509585148554	2	0	0	3	0	0	0	0	2
ENSOART00000029023	ENSOART00000029023	ensembl:	-		16:40674484-40697370	1263	0	0	0.173084869005431	0	0	0	0	0	0.261884656072315	0	0	2	0	0	0	0	0	3
ENSOART00000029021	ENSOART00000029021	ensembl:	-		16:39430595-39437124	936	1.82267466301034	0.838216519577689	0.700660863954677	2.90414020239562	1.90179887266859	0.479605823488467	0.778332761252535	0.680414832243634	0.588960684863486	24	8	6	28	20	5	8	6	5
ENSOART00000028185	ENSOART00000028185	ensembl:	-		23:47835334-47840373	3251	0.0437356109790745	0	0	0.0895859042088908	0	0	0	0	0	2	0	0	3	0	0	0	0	0
ENSOART00000027678	ENSOART00000027678	ensembl:	-		2:242905-246216	3271	0	0	0	0.0593587637996747	0	0.0549068166450028	0.111373345012307	0	0	0	0	0	2	0	2	4	0	0
ENSOART00000027679	ENSOART00000027679	ensembl:	-		2:379947-388737	2824	0	0.138911236247294	0.116115185669543	0.103131648223479	0.157577694592857	0.031798901778648	0.0322505498880361	0.300693240311634	0.0390415864753699	0	4	3	3	5	1	1	8	1
ENSOART00000027670	ENSOART00000027670	ensembl:	-		17:71816466-71819100	864	0	0.227075348177786	0.126508211547372	0	0	0.207870598664125	0.210823039082902	0.368558034131968	1.1484733354838	0	2	1	0	0	2	2	3	9
ENSOART00000027671	ENSOART00000027671	ensembl:	-		17:71986609-71987687	744	3.05738975730767	6.72307231372158	12.3413249365517	7.17670591490624	8.01509836889294	8.92992696660641	3.79458632032521	11.2707424631324	5.63122409656571	32	51	84	55	67	74	31	79	38
ENSOART00000027672	ENSOART00000027672	ensembl:	-		17:71986609-71987687	555	1.15267573936826	3.35762416420229	0.39388502622317	0.874605929678991	0	0	0.984600571716907	2.86877604945964	0	9	19	2	5	0	0	6	15	0
ENSOART00000027673	ENSOART00000027673	ensembl:	-		17:72031647-72084547	2791	8.22640912023966	21.4357559208538	17.3892394777025	9.39159430758845	12.0223274684307	15.6981703107757	9.59316136763831	15.2125077013824	18.8822703952707	323	610	444	270	377	488	294	400	478
ENSOART00000027674	ENSOART00000027674	ensembl:	-		17:72057511-72084547	2950	0	0.0997421071166044	0	0.460724615159712	0	1.03477195148255	0	0.143925035701704	0	0	3	0	14	0	34	0	4	0
ENSOART00000027675	ENSOART00000027675	ensembl:	-		17:72116217-72123839	3094	0	0.126789053381499	0	0	0	0	0	0	0	0	4	0	0	0	0	0	0	0
ENSOART00000027320	ENSOART00000027320	ensembl:	-		X:121614233-121615282	917	0.387600308698036	0.213951036887249	0	0.317604988640244	0.58237048431301	0	0.297957097766021	1.04176927423126	0.480931036887435	5	2	0	3	6	0	3	9	4
ENSOART00000027327	ENSOART00000027327	ensembl:	-		X:126923471-126927153	3145	0	0	0.0695091222746771	0.0926053337307167	0	0	0.144794201723074	0	0	0	0	2	3	0	0	5	0	0
ENSOART00000027324	ENSOART00000027324	ensembl:	-		X:125777845-125780758	2846	0	0.0344504972481994	0	0	0	0.0946278473434296	0	0.0372961046486321	0	0	1	0	0	0	3	0	1	0
ENSOART00000027995	ENSOART00000027995	ensembl:	-		3:116989665-116992338	2169	0	0.22610987405237	0.151179937450802	0	0.0410485590524674	0.0828032260238839	0	0	0.152494384794529	0	5	3	0	1	2	0	0	3
ENSOART00000027991	ENSOART00000027991	ensembl:	-		3:110363352-110364893	1422	0.149961330367882	0	0.0768657487882768	0.136541854000518	0.25038761718869	0.315689909131649	0.192142516632519	0.373223325703259	0.232602194528364	3	0	1	2	4	5	3	5	3
ENSOART00000027993	ENSOART00000027993	ensembl:	-		3:111718397-111747215	2654	0.2678443730792	0.406484505771929	0.370658573094336	0.585267570124298	0.368889654726925	0.169145083189602	0.411764007561277	0.439936643605906	0.249254197904547	10	11	9	16	11	5	12	11	6
ENSOART00000027992	ENSOART00000027992	ensembl:	-		3:110400423-110405033	1416	2.25899616317766	2.77051910494442	0.926383181642826	0.548481684713943	0.879978821117777	1.20469216420757	0.385913359677177	0.674648604851738	0.467175594095104	45	40	12	8	14	19	6	9	6
ENSOART00000027998	ENSOART00000027998	ensembl:	-		3:126128809-126138302	4653	0.106944757010331	0.105401314596946	0.0704726594306446	0.0417284582825566	0.0956370963959226	0.0964777672007747	0.371878475446878	0.182496821543102	0.142170780408052	7	5	3	2	5	5	19	8	6
ENSOART00000027330	ENSOART00000027330	ensembl:	-		12:522719-678684	2570	0.0829747127560808	0.381620141303628	0.255182322436412	0.113324425907823	0.103897613641056	0.104790215384981	0.141751833282201	0.123904335210125	0.30030119900588	3	10	6	3	3	3	4	3	7
ENSOART00000027335	ENSOART00000027335	ensembl:	-		12:5568064-5590169	520	0.410086561121399	0.75439486761992	0	0.373389454593723	0.342274120139833	0.34538499470347	0	0	0	3	4	0	2	2	2	0	0	0
ENSOART00000027814	ENSOART00000027814	ensembl:	-		2:219835019-219851509	1007	0.0705665744688743	0.292193858981115	0.651259750408717	0.289219239903778	0.530321483728927	0.356614649614998	0.542654734163737	1.0540686576962	0.766409216926625	1	3	6	3	6	4	6	10	7
ENSOART00000027819	ENSOART00000027819	ensembl:	-		2:228855781-228961567	3655	0.622352388354831	0.939185665190305	0.209335612431876	0.451540735787758	0.48702701636602	0.687788264696423	0.149508431546616	0.290409613761989	0.0904952997590516	32	35	7	17	20	28	6	10	3
ENSOART00000028062	ENSOART00000028062	ensembl:	-		3:223472789-223475856	2819	0.0504379110652612	0.139157620135636	0.193868561150993	0.0688763804145924	0	0	0.0969232559955451	0.0753066433699942	0.0782216674043594	2	4	5	2	0	0	3	2	2
ENSOART00000028065	ENSOART00000028065	ensembl:	-		3:223678314-223873132	1240	0.0573068874920616	0.0790694477164319	0.264442971234507	0.782913372535226	0.143534308445736	0.144838868746616	0.0734480265192047	0.171201151338721	0.0889140646826166	1	1	3	10	2	2	1	2	1
ENSOART00000028067	ENSOART00000028067	ensembl:	-		3:223791999-223793165	1059	0.268466055026708	0.555692570338023	0.206426996745854	0	0.168066612344394	0.932598867038066	0	0.50115540051939	0.208221794535306	4	6	2	0	2	11	0	5	2
ENSOART00000027744	ENSOART00000027744	ensembl:	-		2:88928604-88966029	4793	0.237293759590748	0.225080300087357	0.182437879869693	0.263312404866844	0.241396971858538	0.28097916802746	0.247005472345388	0.332186669611955	0.299039166009551	16	11	8	13	13	15	13	15	13
ENSOART00000027745	ENSOART00000027745	ensembl:	-		2:89005766-89097118	442	0.321684324192243	0.2218237899737	0	0.6589225669301	0.402675435458627	0.406335287886435	0.824213148269809	0.480292822760212	0.498884344825541	2	1	0	3	2	2	4	2	2
ENSOART00000027746	ENSOART00000027746	ensembl:	-		2:89118565-89140392	2556	0.973373627237885	0.997654913258457	0.384870052031443	0.455780554903136	0.766066622570624	0.421526720976609	0.391919453514794	0.747497984718358	1.81162879411477	35	26	9	12	22	12	11	18	42
ENSOART00000027747	ENSOART00000027747	ensembl:	-		2:89795772-89821319	4745	0.0749061081298417	0.0620103721799753	0.276450702888565	0.143217872994853	0.112546624681777	0.113532381329422	0.115164028936329	0.134218816223402	0.278828510532631	5	3	12	7	6	6	6	6	12
ENSOART00000027740	ENSOART00000027740	ensembl:	-		2:79362308-79363579	1154	2158.18740873482	3223.1233839612	557.629533798968	950.708004636241	1752.61235079624	3211.84676313132	314.403352837132	452.175125423725	974.592668630805	35037	37924	5887	11301	22724	41283	3984	4916	10201
ENSOART00000027741	ENSOART00000027741	ensembl:	-		2:81398971-81564319	1648	0.0431192600061629	0.119049211666024	0.397948160595618	0	0.162024797971793	0.163416780060316	0.0552642917984307	0.386449200837404	0.0669013593485707	1	2	6	0	3	3	1	6	1
ENSOART00000028370	ENSOART00000028370	ensembl:	-		11:34223969-34225395	1126	0.063108828144011	1.13232946638038	0.388288080912716	0	0.474275074702513	0.558180504468036	0.16176829997125	0.471335318960954	0.489580107488652	1	13	4	0	6	7	2	5	5
ENSOART00000028371	ENSOART00000028371	ensembl:	-		11:36478325-36581882	905	0.0785199342432667	0	0	0	0	0	0.100635970037363	0	0.121827005752977	1	0	0	0	0	0	1	0	1
ENSOART00000028373	ENSOART00000028373	ensembl:	-		11:37420937-37423551	530	0	0	0.412464508592187	0.366344370544785	0.167989291669437	0.338868296690197	0	0	0	0	0	2	2	1	2	0	0	0
ENSOART00000028374	ENSOART00000028374	ensembl:	-		11:37486144-37489184	886	0.32088662784795	1.99259062749876	0.986935393019681	0.109572526178745	1.40637698724918	1.82397743329008	0.513970388734841	1.31782376086916	2.73767007284625	4	18	8	1	14	18	5	11	22
ENSOART00000028375	ENSOART00000028375	ensembl:	-		11:39572762-39592249	1996	0	0	0.0547610695275199	0	0.0891696104572711	0	0	0	0	0	0	1	0	2	0	0	0	0
ENSOART00000028376	ENSOART00000028376	ensembl:	-		11:40159758-40312440	1762	0	0.0556447872692256	0	0.165291586029003	0.101011658611074	0.152843844233485	0	0	0	0	1	0	3	2	3	0	0	0
ENSOART00000028377	ENSOART00000028377	ensembl:	-		11:40260035-40261135	1072	2.12191975693741	2.74467471030874	0.815694737141266	1.90177837880758	1.07930567734885	2.26133904027223	1.95388787243605	1.38621827763069	1.85127045122761	32	30	8	21	13	27	23	14	18
ENSOART00000028379	ENSOART00000028379	ensembl:	-		11:41007224-41010916	2434	1.51863291759599	2.41770067764618	0.628744771881718	1.27633535834831	2.01116093600094	1.95498001700552	1.01021775299371	1.00301085377574	0.543566673162422	52	60	14	32	55	53	27	23	12
ENSOART00000028621	ENSOART00000028621	ensembl:	-		6:89802798-89818463	2016	0	0	0	0.0963107720182222	0	0	0	0.210604590932553	0	0	0	0	2	0	0	0	4	0
ENSOART00000028178	ENSOART00000028178	ensembl:	-		23:38982603-39139529	3094	0.0918893187696458	0.126789053381499	0.0706548770374465	0.156886325459547	0.0287764462135752	0.0580478982694907	0.0294361838667789	0.17153315098579	0.0356345960589672	4	4	2	5	1	2	1	5	1
ENSOART00000028820	ENSOART00000028820	ensembl:	-		26:5716750-5725417	3272	0	0.0299651941223642	0.0668111826264851	0.0890109335522934	0	0.0823077180743889	0	0	0	0	1	2	3	0	3	0	0	0
ENSOART00000028821	ENSOART00000028821	ensembl:	-		26:5716750-5725417	2351	0	0	0.278953027929212	0	0	0	0	0	0	0	0	6	0	0	0	0	0	0
ENSOART00000027136	ENSOART00000027136	ensembl:	-		4:38776752-38807805	3787	0.0187643360153568	0.0518069978414596	0.11545085268226	0	0	0.0237127273892004	0.0240495254512315	0	0.0291136625842209	1	2	4	0	0	1	1	0	1
ENSOART00000029079	ENSOART00000029079	ensembl:	-		8:44471402-44496409	1283	0	0	0.0851933708315898	0	0.0693954205649274	0	0	0	0.171868184265697	0	0	1	0	1	0	0	0	2
ENSOART00000028301	ENSOART00000028301	ensembl:	-		10:36260720-36269661	4236	0.285271371626206	0.810369123293334	0.51609616228085	0.733380609589182	0.714384739263592	0.466299433519033	0.300985075976217	0.50115540051939	0.286304967486046	17	35	20	32	34	22	14	20	11
ENSOART00000028300	ENSOART00000028300	ensembl:	-		10:35861315-36006374	1887	0.301364332198848	0.207888357796692	0.231697074248924	0.102894815256352	0.18868637606906	0.523382194061108	0.193058935630766	0.168751532321156	0.467423169926633	8	4	4	2	4	11	4	3	8
ENSOART00000028305	ENSOART00000028305	ensembl:	-		10:41486090-41531659	3671	0.0580890797556872	0.080152333422496	0.119098986409076	0.0528909061260517	0.048483394844106	0.0244620263205944	0.124047334355508	0	0.150168128856503	3	3	4	2	2	1	5	0	5
ENSOART00000028307	ENSOART00000028307	ensembl:	-		10:42125298-42317391	1025	0	0	0	0	0	0	0.0888541979354281	0.103555818370738	0.107564331908726	0	0	0	0	0	0	1	1	1
ENSOART00000027899	ENSOART00000027899	ensembl:	-		3:935339-936842	1013	0.210508402549978	0	0	0	0	0.177295357597043	0	0	0	3	0	0	0	0	2	0	0	0
ENSOART00000027890	ENSOART00000027890	ensembl:	-		24:41696723-41716039	4885	0	0.0401623543143516	0.0447504993969006	0.0596200152677797	0.0182260643981171	0.0735129891836853	0.0372878415082145	0	0.135418759721324	0	2	2	3	1	4	2	0	6
ENSOART00000027891	ENSOART00000027891	ensembl:	-		24:41799897-41832146	1304	0	0.225643570547533	0.167642783400199	0.297795270534871	0.0682778562766885	0.413122047092106	0.0698432154016977	0	0	0	3	2	4	1	6	1	0	0
ENSOART00000027893	ENSOART00000027893	ensembl:	-		3:40455578-40461685	2559	0	0	0	0	0	0.0350918712867925	0.0355902903023892	0	0.0430845799947028	0	0	0	0	0	1	1	0	1
ENSOART00000027896	ENSOART00000027896	ensembl:	-		3:583070-594862	830	0.42822829286277	0.945265858222551	0.52676190253942	0.584826856592578	1.17955800439188	0.75724246750724	0.329188745363183	0.639425986927752	0.797012820769478	5	8	4	5	11	7	3	5	6
ENSOART00000027897	ENSOART00000027897	ensembl:	-		3:657336-660937	3359	0.846474868706006	0.963539894446251	1.13898517801688	0.867055000247407	1.43084772263721	0.801865526856573	0.325341374238651	0.75840224231026	1.34571889179842	40	33	35	30	54	30	12	24	41
ENSOART00000027275	ENSOART00000027275	ensembl:	-		X:40647514-40680573	1812	0	0	0.180965388703526	0.1071537066163	0	0	0	0.29289380195918	0	0	0	3	2	0	0	0	5	0
ENSOART00000027279	ENSOART00000027279	ensembl:	-		X:49702553-49814007	932	1.06777308843936	0.526214932209861	2.46296828132898	1.45830216171797	1.81443070840451	1.34864061559304	1.36799654703354	0.911113423433535	1.77446523937411	14	5	21	14	19	14	14	8	15
ENSOART00000028666	ENSOART00000028666	ensembl:	-		19:1425213-1433661	2210	0.0964909555579763	0	0.247292069631063	0.13178451338602	0.161109136489736	0.284394229878285	0.164842629653962	0.240146411380106	0.399107475860433	3	0	5	3	4	7	4	5	8
ENSOART00000028665	ENSOART00000028665	ensembl:	-		19:615758-668978	3595	0.079083602857659	0	0	0.0270045224462776	0.222823533010444	0.0499583302491806	0.050667901465265	0.1771539034715	0	4	0	0	1	9	2	2	6	0
ENSOART00000028662	ENSOART00000028662	ensembl:	-		6:116830864-116831975	590	0.602422852671354	0.664890391800608	1.29681637870933	0	0.452570961114432	0.456459073795594	0	0.17990629462713	0	5	4	7	0	3	3	0	1	0
ENSOART00000028663	ENSOART00000028663	ensembl:	-		6:116888365-116892246	1764	0.161170948000728	1.05639535778474	0.495705645246847	0.220138907470222	0.30274021208335	0.356298893441615	0.154890396060908	0.180518220799331	0.625019502304107	4	19	8	4	6	7	3	3	10
ENSOART00000028660	ENSOART00000028660	ensembl:	-		6:116805686-116807320	1584	0.134624376125712	1.3002358847658	0.276017916103358	0.183866019307515	0.393296686870544	0.453422919396847	0	0.201031654981074	0.208813333724327	3	21	4	3	7	8	0	3	3
ENSOART00000028661	ENSOART00000028661	ensembl:	-		6:116826888-116831975	2646	0.161182926517859	0.148255983054557	0.0826176075411411	0	0	0	0	0	0.125003900460821	6	4	2	0	0	0	0	0	3
ENSOART00000028668	ENSOART00000028668	ensembl:	-		19:7898193-7905328	4929	0.0432633418103322	0	0	0.0196959339002572	0	0.0546380307444513	0.092387454741138	0.215347360174491	0.0671049544774465	3	0	0	1	0	3	5	10	3
ENSOART00000028086	ENSOART00000028086	ensembl:	-		21:31837176-31842900	5346	0.412191180066235	0.532032393244033	0.981442470082079	0.508468991665227	0.432868963511566	0.688568743902832	0.562162986922855	1.05231384829599	0.742447408797606	31	29	48	28	26	41	33	53	36
ENSOART00000028089	ENSOART00000028089	ensembl:	-		21:34858711-34895950	3041	0	0.064515981856497	0.0359431419851791	0	0	0	0	0	0	0	2	1	0	0	0	0	0	0
ENSOART00000027894	ENSOART00000027894	ensembl:	-		3:40455681-40475522	1945	0.0365349822571498	0.100870488856353	0	0.0499132432875928	0	0.0923394330312618	0.0468254770610868	0	0.113371146741845	1	2	0	1	0	2	1	0	2
ENSOART00000027895	ENSOART00000027895	ensembl:	-		3:569361-587086	1700	0	0.115407706368004	0	0	0.104695613219243	0	0	0	0	0	2	0	0	2	0	0	0	0
ENSOART00000027325	ENSOART00000027325	ensembl:	-		X:125822205-125823413	890	0.239601136834975	0.110164174346489	0.61406233020747	0	0.400057518699232	0.201797974433488	0.204664163783851	0.834846063831514	0.371640809684644	3	1	5	0	4	2	2	7	3
ENSOART00000028205	ENSOART00000028205	ensembl:	-		13:24082134-24087572	3361	0	0	0	0	0.105936087962605	0	0	0	0	0	0	0	0	4	0	0	0	0
ENSOART00000027555	ENSOART00000027555	ensembl:	-		1:229563882-229741892	5132	0.0277054698544371	0.30577595384612	0.319498805443693	0.0756673875248387	0.173421437852778	0.174945849877321	0.0887330016405045	0.144780396884265	0.236318753365333	2	16	15	4	10	10	5	7	11
ENSOART00000027550	ENSOART00000027550	ensembl:	-		1:224894006-224954099	1907	0.0745592403214322	0	0.114633555088547	0.0509078438355364	0	0	0	0	0	2	0	2	1	0	0	0	0	0
ENSOART00000028788	ENSOART00000028788	ensembl:	-		22:38677015-38798788	768	0.0925267454298911	0.383123979158832	0.142321737990794	0.252815776547833	0	0.233854423497141	0.237175918968265	0.276418525598976	0.574236667741899	1	3	1	2	0	2	2	2	4
ENSOART00000028785	ENSOART00000028785	ensembl:	-		22:35491989-35651802	2039	0.174315587580235	0	0	0.238060956827778	0	0.220162359384603	0	0	0.162216930171326	5	0	0	5	0	5	0	0	3
ENSOART00000028780	ENSOART00000028780	ensembl:	-		22:29977290-29979969	1788	0.0795215163830935	0.109727685025508	0.0611314847745692	0.162888017104644	0.0995428089892132	0.10044753760951	0.15281133034197	0.23746020991053	0	2	2	1	3	2	2	3	4	0
ENSOART00000028438	ENSOART00000028438	ensembl:	-		18:13807525-13826529	3014	0.0471746752796852	0	0.0725302553264298	0	0	0.0595886520390857	0	0	0	2	0	2	0	0	2	0	0	0
ENSOART00000027966	ENSOART00000027966	ensembl:	-		3:79095304-79108057	3649	0.0194739765662254	0	0	0	0.0731753540853699	0.0738040157685395	0.0249590443638843	0	0	1	0	0	0	3	3	1	0	0
ENSOART00000027962	ENSOART00000027962	ensembl:	-		3:62462472-62524665	1128	0.88223804824954	1.73894284246511	0.969106733734381	0.602454616454411	0.631220103357928	1.27352238561925	0.565185168605228	0.752799388865297	1.0751665268359	14	20	10	7	8	16	7	8	11
ENSOART00000027968	ENSOART00000027968	ensembl:	-		3:80213151-80333966	3848	0.129317555709218	0.0509857330627878	0	0.0504580344045572	0.0462532594783558	0	0.0946731318958564	0.0551687701819162	0.0573042828515824	7	2	0	2	2	0	4	2	2
ENSOART00000027969	ENSOART00000027969	ensembl:	-		3:84593692-84680075	646	0.330100637435182	0	0	0	0	0	0	0	0	3	0	0	0	0	0	0	0	0
ENSOART00000028909	ENSOART00000028909	ensembl:	-		20:27113964-27120925	1054	0.0674198676377195	0	0.207406251948633	0	0	0	0	0	0	1	0	2	0	0	0	0	0	0
ENSOART00000028908	ENSOART00000028908	ensembl:	-		20:26955054-26960989	619	0.459298145837292	0.475346067841653	0.529740362408383	0.627342540835981	0.143835742463331	0.145072857226013	0.588533459669233	1.02886636991929	0.356230824576557	4	3	3	4	1	1	4	6	2
ENSOART00000028903	ENSOART00000028903	ensembl:	-		20:25835020-25888178	641	0.887167698688341	4.59015801786423	0.170519648637956	0.15145282089605	2.08281487564364	0	0.142083545840583	0	0	8	30	1	1	15	0	1	0	0
ENSOART00000028902	ENSOART00000028902	ensembl:	-		20:25687644-25888178	1082	0.065675176053749	0	0.505097480484888	0.53834339109631	0.0822868064554546	0	0.168346678158621	0	0.101897819044773	1	0	5	6	1	0	2	0	1
ENSOART00000028904	ENSOART00000028904	ensembl:	-		20:25850799-25888178	2382	1.5517852734797	0	0.642470518371159	0.774367718594875	0	1.58307665975123	0.879331569794896	0.757539939173013	0.601719027155239	52	0	14	19	0	42	23	17	13
ENSOART00000028577	ENSOART00000028577	ensembl:	-		9:93857057-93860054	2881	0	0.10213093231308	0	0	0	0.0623395339277349	0.0632249586142408	0	0	0	3	0	0	0	2	2	0	0
ENSOART00000028574	ENSOART00000028574	ensembl:	-		9:89756522-89811835	4573	0	0.0857829283101593	0	0	0	0	0	0	0	0	4	0	0	0	0	0	0	0
ENSOART00000028288	ENSOART00000028288	ensembl:	-		10:18636047-18662166	2264	0	0	0	0	0.117940312304556	0	0.0804554354097295	0.0937674150441756	0.146095547976737	0	0	0	0	3	0	2	2	3
ENSOART00000028008	ENSOART00000028008	ensembl:	-		3:136890448-136930083	1137	8.37744517210955	5.00306978765629	4.99923067022832	6.74531169512319	3.13119392228285	5.44850889390498	8.00963991083063	5.97472443722114	5.13923574320866	134	58	52	79	40	69	100	64	53
ENSOART00000028009	ENSOART00000028009	ensembl:	-		3:144477169-144527177	2000	0.177714741538049	0.147119607996992	0.10930309477693	0.339784403680288	0.0889912712363566	0.359110952162303	0.637486390917628	0	0.220506880412889	5	3	2	7	2	8	14	0	4
ENSOART00000028002	ENSOART00000028002	ensembl:	-		3:131632147-131632909	288	24.9284605581996	69.8118348969269	261.128129619162	12.8093326784236	46.9741929696451	24.3158910254079	39.210430315103	106.145101785832	27.9457633477678	101	205	688	38	152	78	124	288	73
ENSOART00000028006	ENSOART00000028006	ensembl:	-		3:133771334-133828106	1396	0.81471990667511	2.45897106466373	1.01795249282462	2.99032528822194	1.40262628029407	1.09336199828182	2.15281040694096	1.06448853411182	0.552846763212831	16	35	13	43	22	17	33	14	7
ENSOART00000029012	ENSOART00000029012	ensembl:	-		16:23642684-23645900	2745	0.155369771790985	0	0.0398189780608123	0.0707331571543665	0.129708995133813	0	0.165893538950481	0.154673535635711	0	6	0	1	2	4	0	5	4	0
ENSOART00000029014	ENSOART00000029014	ensembl:	-		16:25683950-25692149	1059	0	0.0925836781571063	0.412853993491708	0	0.0840739608921641	0	0	0	0	0	1	4	0	1	0	0	0	0
ENSOART00000029018	ENSOART00000029018	ensembl:	-		16:34794878-34821473	4713	0	0	0.115959149986134	0.0411972239314101	0.0377641719653539	0	0	0	0.0233934734153288	0	0	5	2	2	0	0	0	1
ENSOART00000029019	ENSOART00000029019	ensembl:	-		16:37727720-37769966	3816	0	0	0.143216843261176	0	0.116614101029934	0	0.143200554848764	0.0834471020676154	0.0866772328667017	0	0	5	0	5	0	6	3	3
ENSOART00000027620	ENSOART00000027620	ensembl:	-		17:49552168-49566888	5860	0	0	0.0373048105040716	0	0	0	0	0	0.0376291604800152	0	0	2	0	0	0	0	0	2
ENSOART00000027627	ENSOART00000027627	ensembl:	-		17:62200479-62206556	888	0	1.32540187384677	0.369267212084222	0.327977223629622	0.200430791072875	0.505530462595951	0	0	0.248318559023524	0	12	3	3	2	5	0	0	2
ENSOART00000027626	ENSOART00000027626	ensembl:	-		17:62195706-62200769	4046	0.0878471287879631	0.145446967866526	0.162090600262377	0.119971895939654	0.0659952711461975	0.177514064341227	0.112550114784743	0.0524689638309475	0.190749896550942	5	6	6	5	3	8	5	2	7
ENSOART00000027625	ENSOART00000027625	ensembl:	-		17:61944688-62006129	752	1.79600266157125	4.69517250191348	6.39571684302005	1.67826643155157	1.89366031007378	5.01447952596734	1.33210920636146	4.37564644777954	10.9958600060772	19	36	44	13	16	42	11	31	75
ENSOART00000027629	ENSOART00000027629	ensembl:	-		17:62618649-62619815	1055	0.673799967916775	1.48743336032065	1.45058272489109	0.276060449841805	1.18109005753817	0.510626681903419	0.345310153113986	0.503055515782023	0.94055067474692	10	16	14	3	14	6	4	5	9
ENSOART00000027628	ENSOART00000027628	ensembl:	-		17:62205770-62206556	550	2.4556254572756	10.6994244534378	5.56474200297658	2.471159299493	3.23651589966873	6.69288819073553	2.31813233060956	3.66681738685478	5.41244161013455	19	60	28	14	20	41	14	19	27
ENSOART00000027323	ENSOART00000027323	ensembl:	-		X:124901153-124903389	1495	0	0	0.292449751911518	0	0	0.120133911201207	0	0.425998851491666	0	0	0	4	0	0	2	0	6	0
ENSOART00000028704	ENSOART00000028704	ensembl:	-		19:60205765-60207089	1200	0.355408352971879	0.653808885270598	0.364343649256432	0	0.222514055881262	0.299259126801919	0	0.265361784575017	0	6	8	4	0	3	4	0	3	0
ENSOART00000028707	ENSOART00000028707	ensembl:	-		19:60371756-60377515	776	0.0915728614563871	1.39021891535915	0.563418014314071	0.500418856672	0.229358946485455	0.578493622145882	0.586827016003955	0.95749097527068	0	1	11	4	4	2	5	5	7	0
ENSOART00000028701	ENSOART00000028701	ensembl:	-		19:59758460-59761062	2477	0.401762017935197	0.871102392864859	1.1473564441192	0.58789619415241	0.610846539265356	0.833651617553581	0.698567035225808	0.428521250827642	0.93472839900498	14	22	26	15	17	23	19	10	21
ENSOART00000028703	ENSOART00000028703	ensembl:	-		19:59873605-59876283	2551	0	0	0	0	0	0.105570699153038	0	0	0	0	0	0	0	0	3	0	0	0
ENSOART00000028702	ENSOART00000028702	ensembl:	-		19:59772392-59775970	3480	0.91917774915505	3.66380166420778	1.50769869110885	0.725319745130335	1.07418104370929	1.75435474532962	0.968258787668592	1.09804876375869	1.55238427563289	45	130	48	26	42	68	37	36	49
ENSOART00000028708	ENSOART00000028708	ensembl:	-		7:1002050-1087977	2005	1.73721072800275	2.05448785707078	3.05303623499118	1.88836362572586	2.30830366641834	2.46285364520561	1.63514465247027	2.9646403862745	2.19956987943031	49	42	56	39	52	55	36	56	40
ENSOART00000028983	ENSOART00000028983	ensembl:	-		14:56533131-56577921	2470	0.230232589011833	0	0.265513590551246	0.0786083062302575	0.0360462852570048	0.0727126304638883	0.147490773900913	0.257841410113377	0.0892740406529915	8	0	6	2	1	2	4	6	2
ENSOART00000028987	ENSOART00000028987	ensembl:	-		14:59280178-59315938	2138	0	0.0917647805545404	0	0	0	0.0420019170359692	0	0	0.0515684940161106	0	2	0	0	0	1	0	0	1
ENSOART00000028986	ENSOART00000028986	ensembl:	-		14:59145330-59304631	4251	0.200653974860624	0.184561435503344	0.33428879792594	0.182698204082556	0.167493831236825	0.16895363545627	0.214225022418255	0.174785461493777	0.129679416850676	12	8	13	8	8	8	10	7	5
ENSOART00000028985	ENSOART00000028985	ensembl:	-		14:59145330-59315938	875	0.893622293305548	1.23292557522137	0.374753467806616	1.3314001123799	1.42405715508888	1.02608240179475	0.728604423070511	0.727849466262904	0.756023589987048	11	11	3	12	14	10	7	6	6
ENSOART00000028984	ENSOART00000028984	ensembl:	-		14:57270761-57272125	1310	0	0.823518991082977	0.41718738464477	0.444646984096342	0.339694205748266	0.411229885044356	0	0.162052998213751	0.75746638309771	0	11	5	6	5	6	0	2	9
ENSOART00000028989	ENSOART00000028989	ensembl:	-		14:59246943-59253659	2057	0.103667968781297	0.715214428765151	0.903390403058284	0.0943911115161575	0.173092460691452	0.960254934558397	0.0885518258471695	0.77402562345654	0.80398716728083	3	15	17	2	4	22	2	15	15
ENSOART00000028988	ENSOART00000028988	ensembl:	-		14:59165352-59166538	908	1.33084750022975	4.96864921210271	2.40769090685207	2.77985981613829	2.74460354780346	3.85626465601182	2.50739967513113	2.80558714969181	4.24985727668013	17	46	20	26	28	39	25	24	35
ENSOART00000027188	ENSOART00000027188	ensembl:	-		5:2273915-2373981	4315	0.0164682596732691	0.431861277203308	0.354661593223662	0.0449971069267059	0.0412474026587979	0.124846152817638	0.0633201989922229	0.17219304676942	0.22996082545956	1	19	14	2	2	6	3	7	9
ENSOART00000027187	ENSOART00000027187	ensembl:	-		5:2250114-2439312	2334	0.0609187966122413	0.126066502139667	0	0	0.114403113563631	0.0769495275260515	0.039021230884239	0.136432794125973	0.0944759556182044	2	3	0	0	3	2	1	3	2
ENSOART00000027184	ENSOART00000027184	ensembl:	-		4:118995961-119050830	3925	0.0905552823123819	0.42478683065138	0.389901853442064	0.173138549646007	0.0907136793993164	0.18298647243939	0.0696118875545074	0.162259435154151	0.112360193840963	5	17	14	7	4	8	3	6	4
ENSOART00000027185	ENSOART00000027185	ensembl:	-		4:119199419-119216609	5513	0.0257907620701925	0	0	0.0176095153626642	0.0161498865562855	0	0.0330402876415069	0.0577605915998586	0.0199988101226999	2	0	0	1	1	0	2	3	1
ENSOART00000027182	ENSOART00000027182	ensembl:	-		4:118176465-118264152	1419	0	0.20735674136292	0	0	0	0.0632840723205793	0	0	0	0	3	0	0	0	1	0	0	0
ENSOART00000027849	ENSOART00000027849	ensembl:	-		24:22192111-22201388	2112	0.134614371341517	0.0464233499850263	0.258766796346898	0.183866019307515	0.126428440841626	0.170033594773818	0.129368683073599	0.201031654981074	0.156610000293245	4	1	5	4	3	4	3	4	3
ENSOART00000027842	ENSOART00000027842	ensembl:	-		24:9518636-9530140	2162	0	0	0	0	0	0.0415356607876513	0.126376807886883	0	0.203984163194162	0	0	0	0	0	1	3	0	4
ENSOART00000027840	ENSOART00000027840	ensembl:	-		24:1656624-1682490	1960	0.362683145996019	0.850657301176871	0.501901965812432	0.3467187792656	0.363273610503951	0.732925128050263	0.18586847527309	0.270777331198997	0.337510531244218	10	17	9	7	8	16	4	5	6
ENSOART00000027847	ENSOART00000027847	ensembl:	-		24:20439750-20506782	6370	0.100429361907281	0.123166508999171	0.240245647529058	0.289567332133908	0.15369437105891	0.225515424015466	0.243045438066985	0.316601187248058	0.398089344544462	9	8	14	19	11	16	17	19	23
ENSOART00000028012	ENSOART00000028012	ensembl:	-		3:150809445-150979162	2192	0.194566616590445	0.313195505089572	0.199458202147682	0.132866685484993	0.284207094891853	0.163827989125138	0.249294396579782	0.193694733266436	0.201192409135848	6	7	4	3	7	4	6	4	4
ENSOART00000028015	ENSOART00000028015	ensembl:	-		3:163025309-163029420	450	0.473877803962506	0	0.728687298512865	0.431472258641636	0.98888757673384	0.99758011285601	0	0.707631425533379	0	3	0	3	2	5	5	0	3	0
ENSOART00000029099	ENSOART00000029099	ensembl:	-		8:64644005-64646583	1784	0	0	0	0	0.149673131758697	0	0.0510513188810616	0.118996315952922	0	0	0	0	0	3	0	1	2	0
ENSOART00000029097	ENSOART00000029097	ensembl:	-		8:55394413-55396285	1627	0	0.36169540994958	0.20154227678598	0.0596688741206933	0	0.110387336967304	0.0559775985764068	0.0652395290903545	0.338824339909172	0	6	3	1	0	2	1	1	5
ENSOART00000028323	ENSOART00000028323	ensembl:	-		10:69698774-69701603	597	3.452913864893	5.2570927810328	4.39429769267906	2.76445793853309	4.47250010699876	3.60930511776067	4.11871023582361	4.62271785524318	4.61697823310069	29	32	24	17	30	24	27	26	25
ENSOART00000028322	ENSOART00000028322	ensembl:	-		10:69537634-69546189	4257	0	0	0.077028255656751	0	0.0209148049294813	0	0.0213943041775461	0	0.05179865642774	0	0	3	0	1	0	1	0	2
ENSOART00000028325	ENSOART00000028325	ensembl:	-		10:76524318-76534759	186	39.3633393121208	75.4034019924053	39.3745789984062	32.3604193981227	90.4388822104247	68.06080387424	45.0453823337744	46.2243108614546	10.669687761914	103	143	67	62	189	141	92	81	18
ENSOART00000028324	ENSOART00000028324	ensembl:	-		10:74989051-75140710	3501	0	0.0280051742840261	0.124882141990208	0	0.127106372330828	0.153873507400202	0	0.0909551960839819	0.157459926030341	0	1	4	0	5	6	0	3	5
ENSOART00000028005	ENSOART00000028005	ensembl:	-		3:133303922-133335874	3827	0.11144238922557	0.128150592322861	0.0856831158429028	0.177572199467096	0.13954369848838	0.04692976149616	0.118990792897588	0.027735749628954	0.172856190550997	6	5	3	7	6	2	5	1	6
ENSOART00000027882	ENSOART00000027882	ensembl:	-		24:40973772-41091132	1621	0	0	0.0674294230579455	0	0	0.110795926740163	0	0	0	0	0	1	0	0	2	0	0	0
ENSOART00000027880	ENSOART00000027880	ensembl:	-		24:40840320-40906649	1492	0.190553319218019	0.328707987144498	0	0	0.298256976896936	0.120375467322925	0.183127787299894	0	0.14779281529014	4	5	0	0	5	2	3	0	2
ENSOART00000028128	ENSOART00000028128	ensembl:	-		21:49653729-49657052	3114	1.23265048246916	2.89758091495778	0.912653150958014	1.18467816679062	2.17221701593735	2.27770607384084	1.02359487278652	1.26119281044003	1.62862458528681	54	92	26	38	76	79	35	37	46
ENSOART00000028125	ENSOART00000028125	ensembl:	-		21:49145258-49150695	5089	0.768244750090739	1.34907589163709	0.923614849906494	1.06829445055701	1.04935451518108	0.899766281484565	0.912657371373935	0.89688007362749	0.519961203567433	55	70	43	56	60	51	51	43	24
ENSOART00000028126	ENSOART00000028126	ensembl:	-		21:49239350-49334414	627	0.113334195359101	0.469281046242397	0	0	0.14200051767911	0.143221847883416	0.145256065205445	0.169289814720904	0.351685614693603	1	3	0	0	1	1	1	1	2
ENSOART00000027348	ENSOART00000027348	ensembl:	-		12:10487341-10493995	1730	0	0	0	0	0.30869001971967	0.15567101360659	0	0.122710651826598	0.318651561290302	0	0	0	0	6	3	0	2	5
ENSOART00000028693	ENSOART00000028693	ensembl:	-		19:58500638-58502223	1487	0	0	0.147011559888271	0	0	0.120780226796102	0	0.214145354061883	0	0	0	2	0	0	2	0	3	0
ENSOART00000028691	ENSOART00000028691	ensembl:	-		19:58205182-58226934	1004	0.56640885942154	0.976856337799128	0.870940994238483	0.580166881639649	0.620499952194165	0.626007219154391	1.17918050692375	0.951496438715201	0.658885100835326	8	10	8	6	7	7	13	9	6
ENSOART00000028694	ENSOART00000028694	ensembl:	-		19:58685723-58686814	936	6.22742097176557	18.1275907377428	11.6783298259705	6.43059616244745	5.32500004573835	9.11251064628086	4.76757181163725	9.75261259549208	14.3703815420509	82	173	100	62	56	95	49	86	122
ENSOART00000027106	ENSOART00000027106	ensembl:	-		4:1772663-1899512	949	0	0	0.575885641606584	0	0.187547463090319	0	0	0	0.116178546055263	0	0	5	0	2	0	0	0	1
ENSOART00000027104	ENSOART00000027104	ensembl:	-		4:1430430-1616868	533	0	0	0.410142944753957	0.364282394725583	0	0	0.170873457568131	0	0	0	0	2	2	0	0	1	0	0
ENSOART00000027109	ENSOART00000027109	ensembl:	-		4:2069419-2094940	845	0	0	0.388058324651821	0	0.105366064597399	0	0	0	0.260954888062591	0	0	3	0	1	0	0	0	2
ENSOART00000027532	ENSOART00000027532	ensembl:	-		1:191007692-191019922	5188	0.123310531100498	0.0567153461823406	0.189616008672392	0.130988590470427	0.120081332305887	0.380733307707522	0.157978993333883	0.163677276530465	0.0637548806128245	9	3	9	7	7	22	9	8	3
ENSOART00000027530	ENSOART00000027530	ensembl:	-		1:187586052-187650171	1301	1.6937540727395	0.527689890204721	0.84024011964057	1.64165079191091	1.16300298059976	0.690101538486095	1.67997183100327	1.46856637120686	1.1864321006074	31	7	10	22	17	10	24	18	14
ENSOART00000029001	ENSOART00000029001	ensembl:	-		14:60449350-60450555	1058	0	0	0	0.275277669738284	0	0	0	0	0	0	0	0	3	0	0	0	0	0
ENSOART00000029004	ENSOART00000029004	ensembl:	-		14:61547588-61565500	1357	0.157144444939667	0.144578556245842	0	0	0	0.132350919119974	0.134230733800757	0.156440256197505	0.0812479294078442	3	2	0	0	0	2	2	2	1
ENSOART00000029006	ENSOART00000029006	ensembl:	-		14:62523847-62535001	5151	0.38639662916928	0.304648067392407	0.445638990137567	0.18847070121213	0.172781754816629	0.156867016685596	0.106086840866411	0.267886095862957	0.19263850938808	28	16	21	10	10	9	6	13	9
ENSOART00000027717	ENSOART00000027717	ensembl:	-		2:38574271-38592405	1282	0	0	0	0	0	0	0.142083545840583	0	0.258003370217889	0	0	0	0	0	0	2	0	3
ENSOART00000027716	ENSOART00000027716	ensembl:	-		2:37175369-37176100	555	7.30050811622476	4.94810641281842	9.25673576627363	8.92098048272571	6.89582766971733	6.6325919007289	10.8298408966505	9.94509030479343	6.55560995822103	57	28	47	51	43	41	66	52	33
ENSOART00000027715	ENSOART00000027715	ensembl:	-		2:33019438-33028116	892	0	0.109917169471273	0.245074203535717	0.108835491249291	0	0	0.102102637762123	0.118996315952922	0	0	1	2	1	0	0	1	1	0
ENSOART00000027714	ENSOART00000027714	ensembl:	-		2:32070787-32074679	2709	0.0524859620867373	0.0724227024088621	0	0	0	0	0	0.0783644989516477	0	2	2	0	0	0	0	0	2	0
ENSOART00000027713	ENSOART00000027713	ensembl:	-		2:30627370-30666693	1317	0.107960874178414	0.0744465566958053	0.248981992658154	0	0.202746292374727	0.204488119619894	0	0.0805958343432095	0	2	1	3	0	3	3	0	1	0
ENSOART00000027712	ENSOART00000027712	ensembl:	-		2:30627370-30678908	1434	0.297412847675213	0.547120406084182	0.686002686884496	0.609296599546243	0.558612692588943	0.751340515213538	0.762079272013688	0.518140165139503	0.461311465298931	6	8	9	9	9	12	12	7	6
ENSOART00000027711	ENSOART00000027711	ensembl:	-		2:29879434-29893011	1453	0.0489060843015529	0	0.150451610154067	0	0.0612762041189276	0.185348144211563	0	0	0.227639587487497	1	0	2	0	1	3	0	0	3
ENSOART00000027710	ENSOART00000027710	ensembl:	-		2:28989172-29003649	4978	0.0856749746014976	0.039412033110809	0.0658716923123321	0.117012364235879	0.0178855613870634	0.0360787861080362	0.109773667598008	0.0852910516914478	0.0221481398566582	6	2	3	6	1	2	6	4	1
ENSOART00000027718	ENSOART00000027718	ensembl:	-		2:38831586-38957512	952	0.597347158465574	0.309074806716369	0.114814175185851	0	0	0.0943278346879224	0.574005585402188	0.222993096281527	0.810687060341504	8	3	1	0	0	1	6	2	7
ENSOART00000027403	ENSOART00000027403	ensembl:	-		12:78934329-79049714	1663	1.06860133798427	16.1004585460195	6.57301065370318	3.44425389865767	3.96044205559789	9.66385912786799	0.6023728942777	0.702099730685553	7.16010237605694	25	273	100	59	74	179	11	11	108
ENSOART00000027406	ENSOART00000027406	ensembl:	-		12:78878448-78886087	4002	1.22557772404729	2.45070927086259	1.25641810482382	1.35845838552839	1.64573091915525	1.81718563497906	1.18330557616336	0.981347928963082	1.29480019959759	69	100	46	56	74	81	52	37	47
ENSOART00000027405	ENSOART00000027405	ensembl:	-		12:78873778-78886087	3585	0.436217297987366	0.300923257550544	0.487858009571537	0.514517128505716	0.248256295414353	0.300536206085415	0.101618469047491	0.444120141548146	0	22	11	16	19	10	12	4	15	0
ENSOART00000027404	ENSOART00000027404	ensembl:	-		12:78854696-79053579	1467	0.242283219547443	0.802288250835673	0.298031614933687	0.595590541069742	0.242707015434435	0.734439194830411	0.24833143253937	0.217064854458092	0.150311438590926	5	12	4	9	4	12	4	3	2
ENSOART00000028635	ENSOART00000028635	ensembl:	-		6:112865151-112891061	3348	0.148630213371885	0.058600089852332	0.0652945607986438	0	0.106347428805949	0.187727373963862	0.0544059455697813	0.0634078338291558	0.131724540270543	7	2	2	0	4	7	2	2	4
ENSOART00000028634	ENSOART00000028634	ensembl:	-		6:112738281-112739129	595	0	0	0	0	0	0	0	0	0.555899698519888	0	0	0	0	0	0	0	0	3
ENSOART00000028637	ENSOART00000028637	ensembl:	-		6:113538065-113688241	821	1.21213705045735	2.74758433897032	2.92909809132221	2.01020875676523	1.30093479686974	1.96838490364801	2.6621721706885	1.29287105761275	1.88008302422682	14	23	22	17	12	18	24	10	14
ENSOART00000028636	ENSOART00000028636	ensembl:	-		6:112945334-112953639	2717	0.0523314211604605	0.180505085321896	0.120687995705112	0.321579434578326	0.360336085257732	0.13217186314402	0.335175035075451	0.195334401601043	0.12173732816317	2	5	3	9	11	4	10	5	3
ENSOART00000028874	ENSOART00000028874	ensembl:	-		15:65385763-65477061	481	0.591071834247992	0.815562019048563	0.454482722565196	0	0.185102545914349	0	0.189346263791713	0.220675080727665	0.22921713140633	4	4	2	0	1	0	1	1	1
ENSOART00000028872	ENSOART00000028872	ensembl:	-		15:56176711-56177458	521	0.409299446800629	0.376570251104813	1.04897403816631	0.372672776177996	0.341617164055112	0	0.174809122617685	0.61119796831098	0.846475548609939	3	2	5	2	2	0	1	3	4
ENSOART00000028879	ENSOART00000028879	ensembl:	-		15:71242577-71288646	3888	0	0	0.14056467949708	0.124847297060658	0	0	0.046849564240645	0.0273005951208865	0	0	0	5	5	0	0	2	1	0
ENSOART00000027692	ENSOART00000027692	ensembl:	-		2:1725892-1771388	1018	0.349144875320333	0.578073115901735	0	0	0	0.440973527293914	0.268395538950336	0	0.433215875074438	5	6	0	0	0	5	3	0	4
ENSOART00000027698	ENSOART00000027698	ensembl:	-		2:9445015-9446676	728	0.0976106325414236	0.134678729626889	0	0	0	0.246703567645335	0.12510378143381	0.291606356675843	0.151447033250611	1	1	0	0	0	2	1	2	1
ENSOART00000027526	ENSOART00000027526	ensembl:	-		1:181398774-181400786	1849	32.4853582310602	21.0052291383483	25.5389988085784	29.1926831021313	21.6130603355201	26.4150432637291	34.5759195003075	29.5071487844547	26.951772432576	845	396	432	556	449	544	702	514	452
ENSOART00000027529	ENSOART00000027529	ensembl:	-		1:184664161-184685932	4344	0.0654478711494669	0	0.176132979612916	0.11174177968965	0.184403913713753	0.144684909767728	0.0628974812733521	0.146608720759678	0.685276907360498	4	0	7	5	9	7	3	6	27
ENSOART00000028404	ENSOART00000028404	ensembl:	-		11:62172693-62176634	3705	0.038376375517671	0.10587998142034	0	0.0786083062302575	0.072069329840085	0	0.122908978250761	0	0.119032054203989	2	4	0	3	3	0	5	0	4
ENSOART00000028402	ENSOART00000028402	ensembl:	-		11:61601718-61745228	4842	1.52677440159947	2.51167933900353	1.73829493790911	1.24308922099356	1.58081012116674	1.57610240878738	1.05326128197873	2.03871507356271	1.34341835631287	104	124	77	62	86	85	56	93	59
ENSOART00000028403	ENSOART00000028403	ensembl:	-		11:61909667-61930009	1650	0	0.118904909591277	0	0	0	0	0.110394609556138	0	0.0668202667917846	0	2	0	0	0	0	2	0	1
ENSOART00000028401	ENSOART00000028401	ensembl:	-		11:61283299-61284970	1626	0.131146993716561	0.422216818669337	0.201666226525701	0	0	0.110455225858428	0	0	0	3	7	3	0	0	2	0	0	0
ENSOART00000029119	ENSOART00000029119	ensembl:	-		8:90425531-90487306	858	0	0	0	0.339444958721566	0	0.209324239214224	0	0	0	0	0	0	3	0	2	0	0	0
ENSOART00000029118	ENSOART00000029118	ensembl:	-		8:89977909-90043891	1819	0	0.161758777346885	0.300448308897553	0	0	0.148054344991424	0	0	0.121224233322094	0	3	5	0	0	3	0	0	2
ENSOART00000029117	ENSOART00000029117	ensembl:	-		8:89765587-89823411	921	1.00337022577125	0.638955952212775	0.830750991789911	0.105408532241442	0.193249231783619	1.55975380127961	0.395550718279322	0	0.359131727056823	13	6	7	1	2	16	4	0	3
ENSOART00000029116	ENSOART00000029116	ensembl:	-		8:89752567-89756792	1618	0.175714185582994	0.242450760916167	0.202663340130278	0.0600007776232188	0.110001571367561	0.221947436441473	0.22515587857556	0	0.272567219298998	4	4	3	1	2	4	4	0	4
ENSOART00000029115	ENSOART00000029115	ensembl:	-		8:89151399-89159792	2272	0.0625811933507796	0	0	0	0	0	0.0400860708115378	0	0	2	0	0	0	0	0	1	0	0
ENSOART00000029114	ENSOART00000029114	ensembl:	-		8:88890196-89005326	1610	0	0	0	0.361793508798887	0.221149808473489	0.167273822074162	0	0.131856787366468	0.0684803976437544	0	0	0	6	4	3	0	2	1
ENSOART00000029112	ENSOART00000029112	ensembl:	-		8:88033168-88034308	1035	0	0.189558551522326	0.105606854856937	0	0.17196380915238	0.173526760623965	0	0.410221116251234	0	0	2	1	0	2	2	0	4	0
ENSOART00000028245	ENSOART00000028245	ensembl:	-		13:64684046-64849522	945	0	0	0	0	0	0	0.289128739313695	0	0	0	0	0	0	0	0	3	0	0
ENSOART00000028241	ENSOART00000028241	ensembl:	-		13:56795870-56916181	1611	0	0	0	0	0.221012533607894	0.167169989782372	0	0.13177493957791	0.205313668913304	0	0	0	0	4	3	0	2	3
ENSOART00000027227	ENSOART00000027227	ensembl:	-		5:73225899-73407613	3690	0	0	0.118485739595588	0	0.0482337513476187	0	0	0	0.0597579621715147	0	0	4	0	2	0	0	0	2
ENSOART00000027224	ENSOART00000027224	ensembl:	-		5:67930125-67932260	2055	0.0345793384380323	0.0954710952922664	0	0.236207440862209	0	0.174749855066814	0.177276015345623	0.0516519288710495	0.59016440013182	1	2	0	5	0	4	4	1	11
ENSOART00000027222	ENSOART00000027222	ensembl:	-		5:57737929-57804381	3912	0.018164759838997	0.0501516106404927	0.0838213917000995	0.0248162725445726	0.0454965599367876	0.137707349030702	0	0.0813993204217844	0.366384131565383	1	2	3	1	2	6	0	3	13
ENSOART00000027220	ENSOART00000027220	ensembl:	-		5:50153403-50154695	1155	0.369255431659095	0.339640979361349	0.283904142277739	0	0.231183434681831	0.155498006273424	0.0788532925400986	0.275700555402615	0.0954575239882637	6	4	3	0	3	2	1	3	1
ENSOART00000027229	ENSOART00000027229	ensembl:	-		5:76229796-76231029	1125	0	0	0.388633225873528	0	0	0	0	0.283052570213352	0	0	0	4	0	0	0	0	3	0
ENSOART00000028932	ENSOART00000028932	ensembl:	-		20:46594647-46727238	3128	0.568121491389973	0	0	0	0	0	0	0	0	25	0	0	0	0	0	0	0	0
ENSOART00000028936	ENSOART00000028936	ensembl:	-		14:894047-895437	1142	6.9091555226915	14.7716969744921	11.1032291431019	9.09605483957739	11.612566294396	9.11974979569406	6.61888015597874	9.66651661085677	8.59232477010529	111	172	116	107	149	116	83	104	89
ENSOART00000028935	ENSOART00000028935	ensembl:	-		14:880738-882835	2027	0	0.338689959129917	0	0.0957881185933577	0.175654263267053	0.310069683291075	0	0	0.652709068809736	0	7	0	2	4	7	0	0	12
ENSOART00000028938	ENSOART00000028938	ensembl:	-		14:6045605-6068346	1255	0.169916344050301	0.234453558560943	0.783846894814635	1.1603337632793	0.56734364668346	0.715396096868852	0.507991131622866	0.676619689753032	1.58132424200478	3	3	9	15	8	10	7	8	18
ENSOART00000027799	ENSOART00000027799	ensembl:	-		2:197366311-197367335	825	0	0.356653595144222	0	0	0.21573641511844	0.108848604391396	0	0	0.267281067167138	0	3	0	0	2	1	0	0	2
ENSOART00000027793	ENSOART00000027793	ensembl:	-		2:184979039-185169369	3827	0.260037762849616	0.486930078686249	0.714057699844873	0.405879313067648	0.34885924622095	0.563040280978082	0.333152020338452	0.332828995547448	0.489759206561159	14	19	25	16	15	24	14	12	17
ENSOART00000028105	ENSOART00000028105	ensembl:	-		21:43226163-43274345	3954	0.143822583424185	0.148831166410715	0.110574703871451	0.122763351282711	1.48563451236003	2.02088993816661	0.13820265991474	0.16106936848256	0.11153610541876	8	6	4	5	66	89	6	6	4
ENSOART00000028104	ENSOART00000028104	ensembl:	-		21:43215825-43232397	2825	1.38392833034045	1.97891831270684	0.735178849077787	1.16841160304726	1.63828277917479	1.43015909984667	1.5473881992243	1.4277873010762	0.507360963781869	55	57	19	34	52	45	48	38	13
ENSOART00000028199	ENSOART00000028199	ensembl:	-		13:4287988-4311526	3040	0.0467712076621616	0.0645372042189498	0.0359549653871479	0	0.0585468889712872	0	0.0898771903458689	0.139664097144746	0	2	2	1	0	2	0	3	4	0
ENSOART00000027613	ENSOART00000027613	ensembl:	-		17:43839968-44003161	1421	0.150066862620076	0	0	0	0	0	0	0	0.155177255744468	3	0	0	0	0	0	0	0	2
ENSOART00000027617	ENSOART00000027617	ensembl:	-		17:45408201-45411985	3676	0.0386791271199595	0.0266719573363372	0	0	0	0	0	0	0	2	1	0	0	0	0	0	0	0
ENSOART00000027614	ENSOART00000027614	ensembl:	-		17:43839968-43975974	1502	0.0946634296224842	0.652971879594091	0.291086803666923	0.0646346592505779	0.118497032272113	0.478177033505063	0.242544748026135	0.0706689173302309	0.22021326272925	2	10	4	1	2	8	4	1	3
ENSOART00000027615	ENSOART00000027615	ensembl:	-		17:44590631-44785361	1716	0.49707461954109	0.571540654516506	0.254785768710792	0.226296639147711	0.155604234882002	0.627868472503621	0.159222994552122	0	0.385501539183372	12	10	4	4	3	12	3	0	6
ENSOART00000028779	ENSOART00000028779	ensembl:	-		22:29977290-29988220	1751	0.121784701189679	0.0559943547506428	0	0.332659936702574	0.10164622642645	0	0.416059088824885	0	0.062965985269243	3	1	0	6	2	0	8	0	1
ENSOART00000028774	ENSOART00000028774	ensembl:	-		22:20846626-20894753	2618	0	0	0	0	0	0.0343010307956081	0	0.081088398647828	0	0	0	0	0	0	1	0	2	0
ENSOART00000028776	ENSOART00000028776	ensembl:	-		22:22414654-22415794	807	0	0	0.13544373578306	0.360896870611033	0	0.444994984092073	0	0.131530004745981	0	0	0	1	3	0	4	0	1	0
ENSOART00000028777	ENSOART00000028777	ensembl:	-		22:23900155-23956533	1037	8.49986459483995	14.4703920286767	10.4355001179667	5.61704483284675	12.2734011321941	12.9002231677273	5.62053572845857	9.62160376086851	13.6086767257457	124	153	99	60	143	149	64	94	128
ENSOART00000028770	ENSOART00000028770	ensembl:	-		22:12928106-13033141	773	0.0919282541916641	0.126838441356243	0	0	0.115180238790171	0	0.11782089635681	0	0	1	1	0	0	1	0	1	0	0
ENSOART00000028771	ENSOART00000028771	ensembl:	-		22:14970716-15052778	2636	0	0	0	0	0	0.102166484650759	0	0	0	0	0	0	0	0	3	0	0	0
ENSOART00000028773	ENSOART00000028773	ensembl:	-		22:18480530-18483075	1907	2.42285952231322	2.88007197049795	5.33077873815935	2.74902356711897	3.03369199999142	4.23723068386664	3.24735857546337	4.34152473976955	3.93136478401935	65	56	93	54	65	90	68	78	68
ENSOART00000028486	ENSOART00000028486	ensembl:	-		18:67827686-67869950	2197	0.161779464304096	0.758893177199211	0.298506403578324	0.265128606812111	0.162062444989675	0.612987324695318	0	0.241567396062829	0.351285426238103	5	17	6	6	4	15	0	5	7
ENSOART00000028487	ENSOART00000028487	ensembl:	-		18:67971879-67983427	2731	1.40551944430939	5.78193631144316	2.72174889650808	1.67075032410666	2.93311380385634	4.14228354751118	0.933703977909378	2.48746308499467	3.06815824415103	54	161	68	47	90	126	28	64	76
ENSOART00000028485	ENSOART00000028485	ensembl:	-		18:67776751-67843343	1441	0.739920235194752	3.06279484345655	2.27573611316729	1.0779320826578	1.54412432640391	2.9283828274203	0.442421145167729	1.62052998213751	3.51945659860037	15	45	30	16	25	47	7	22	46
ENSOART00000028482	ENSOART00000028482	ensembl:	-		18:67485888-67491638	1357	0.104778534482661	0.144578556245842	0	0	0	0	0	0	0	2	2	0	0	0	0	0	0	0
ENSOART00000028480	ENSOART00000028480	ensembl:	-		18:66878552-66879744	627	1.13374635749952	0	0.522981314722152	2.01284905347174	3.83264066478588	0.71596658817417	1.74293728240451	1.86218796192994	0.879214036734007	10	0	3	13	27	5	12	11	5
ENSOART00000028481	ENSOART00000028481	ensembl:	-		18:67287520-67305825	1262	0	0	0	0	0	0.284557014391682	0	0	0	0	0	0	0	0	4	0	0	0
ENSOART00000028488	ENSOART00000028488	ensembl:	-		18:68038860-68044751	1224	1.56802981728824	6.5705091552518	2.67919586525659	2.30012784937637	2.98130368261725	3.30081654989121	1.41368508680909	3.20862288538419	2.79236654117629	27	82	30	29	41	45	19	37	31
ENSOART00000028489	ENSOART00000028489	ensembl:	-		18:68054661-68059241	1034	9.28073413103615	26.5586924368237	13.6372817808564	12.0177959853763	17.8179238815126	17.973756128733	7.75061789414583	17.4513666173877	13.3282760580067	135	280	129	128	207	207	88	170	125
ENSOART00000027936	ENSOART00000027936	ensembl:	-		3:15953561-15957587	3629	0	0.0540625794504292	0	0	0.024534120855553	0	0	0.0292490255800515	0.0607624360465387	0	2	0	0	1	0	0	1	2
ENSOART00000027935	ENSOART00000027935	ensembl:	-		3:15709940-15711783	1796	0.158299305274657	0	0	0.16216245800841	0.0990994111763436	0.14995036388608	0	0	0	4	0	0	3	2	3	0	0	0
ENSOART00000027932	ENSOART00000027932	ensembl:	-		3:13403867-13405714	1417	0	0	0	0	0	0	0	0	0.233422950331216	0	0	0	0	0	0	0	0	3
ENSOART00000027938	ENSOART00000027938	ensembl:	-		3:21488790-21491847	643	0.221126704965741	0.15248229419654	0.339978521856702	0	0	0	0	0	0	2	1	2	0	0	0	0	0	0
ENSOART00000027332	ENSOART00000027332	ensembl:	-		12:681578-853837	1373	2.951042974876	5.00032571925792	3.34375300538763	1.90909976055931	1.68544608807927	2.15788576711626	1.52554100455313	2.55118394493097	1.04391458316371	57	70	42	27	26	33	23	33	13
ENSOART00000027408	ENSOART00000027408	ensembl:	-		12:78939953-78982616	1146	0.434218110269695	2.22513608925708	1.52615267392143	0.508278838713969	1.24261130294545	1.41016056360822	0.238417677706319	0.370487657347319	1.73172942732635	7	26	16	6	16	18	3	4	18
ENSOART00000028529	ENSOART00000028529	ensembl:	-		9:25697288-25697640	261	0.817030696487079	1.12735331798461	1.25635741122908	0	0	0.344061680547518	0	0.406684727318034	0.844853947942104	3	3	3	0	0	1	0	1	2
ENSOART00000028528	ENSOART00000028528	ensembl:	-		9:25636665-25640045	2645	0.618109472126603	0.222487119844222	0.165297685863032	0.146814757193751	0.168241742733546	0.305490360282611	0.378731993642274	0.240781959538768	0.583572084268515	23	6	4	4	5	9	11	6	14
ENSOART00000028524	ENSOART00000028524	ensembl:	-		9:14862110-14872992	1607	0	0.183098454258857	0.340084302355102	0	0.221562658147055	0.167586094299565	0.056674270618428	0.330257354791558	0.548865912664316	0	3	5	0	4	3	1	5	8
ENSOART00000028527	ENSOART00000028527	ensembl:	-		9:23363257-23365257	783	0.363097767909686	0.501002977218849	0	0	0	0	0	0	0	4	4	0	0	0	0	0	0	0
ENSOART00000028521	ENSOART00000028521	ensembl:	-		9:14595147-14596019	640	4.55380158560358	3.37143847988478	3.07433930291847	3.3371682504314	2.64226471911406	2.94600672150581	1.99214497161759	2.98532007646894	0.344542000645139	41	22	18	22	19	21	14	18	2
ENSOART00000028520	ENSOART00000028520	ensembl:	-		9:14580182-14589093	1292	0.330100637435182	0.683217993794078	0.33839967423198	0.225420878160297	0	0.416959093969123	0.28196765598704	0.492932107569691	0.341341920143791	6	9	4	3	0	6	4	6	4
ENSOART00000028523	ENSOART00000028523	ensembl:	-		9:14674913-14677038	1803	0.0788599397076934	0.87035063512939	0.484983226963637	0.161532875531394	0.0987146658195858	0.199174127655187	0	0.235484667398795	0.489199956545511	2	16	8	3	2	4	0	4	8
ENSOART00000027872	ENSOART00000027872	ensembl:	-		24:40462329-40463477	604	0.353054655270079	0.649479025103243	0.723861554814104	0	0	0.445878896588412	0.301574678423225	0	0.365077616577631	3	4	4	0	0	3	2	0	2
ENSOART00000027873	ENSOART00000027873	ensembl:	-		24:40561696-40565703	1609	0.176697049268666	2.13345158873248	1.0190602048086	0.422354759080532	0.885041984571464	0.39062227969609	0.113207648084293	0.659693684462441	1.23341325277564	4	35	15	7	16	7	2	10	18
ENSOART00000027870	ENSOART00000027870	ensembl:	-		24:39157209-39160570	1155	0.184627715829548	0	0	0.840530373977212	0.770561748104291	0.0777490031367118	0.236559877620296	0.18380037026841	0.477287619941318	3	0	0	10	10	1	3	2	5
ENSOART00000027871	ENSOART00000027871	ensembl:	-		24:40413481-40551726	5661	0.0627856355901959	0.173249207410409	0	0.0342982717521173	0.0314401240898628	0.0634359569267448	0.0321764892717943	0.0750006810316247	0.116855792481658	5	10	0	2	2	4	2	4	6
ENSOART00000027876	ENSOART00000027876	ensembl:	-		24:40590851-40620365	2757	0.232040273975112	1.03164496709561	0.515437678630095	0.211275861141171	0.290551541955947	0.455906076798227	0.26424354897801	0.423500853148377	0.439894030566155	9	29	13	6	9	14	8	11	11
ENSOART00000027877	ENSOART00000027877	ensembl:	-		24:40615682-40620186	2008	0.141586430414982	0.439600422301767	0.979869100531783	0.0966944802732749	0.398929582257243	0.0447211646528397	0.40816484931085	0.211443653047822	0.164721275208831	4	9	18	2	9	1	9	4	3
ENSOART00000027874	ENSOART00000027874	ensembl:	-		24:40562525-40564555	1465	0	0.602537643673685	0.298438484032573	0.39760242263905	0.182264073076802	0.551550855254271	0.0621676128899753	0.217361188730389	0.225774962880091	0	9	4	6	3	9	1	3	3
ENSOART00000027875	ENSOART00000027875	ensembl:	-		24:40565957-40580901	1754	0.2026393860183	0.894664877501876	0.747866924290902	0.276742469197172	0.101472373131535	0.511871209561237	0.155773465593752	0.484126402873463	0.251433158965666	5	16	12	5	2	10	3	8	4
ENSOART00000027879	ENSOART00000027879	ensembl:	-		24:40820044-40828219	5035	0.0564658495081001	0.350632630777338	0.0868346333878289	0	0.0353490650392678	0.160481033356009	0.0542654734163737	0.0843254926156956	0.0656922185937107	4	18	4	0	2	9	3	4	3
ENSOART00000027739	ENSOART00000027739	ensembl:	-		2:79362308-79363579	1079	124.774694978303	192.427892476044	37.0780724727849	48.135833766227	98.4894623614312	227.825030974421	24.307747970135	30.0040418727595	72.9563157453026	1894	2117	366	535	1194	2738	288	305	714
ENSOART00000027735	ENSOART00000027735	ensembl:	-		2:72456763-72567306	4213	0.877368269980689	1.18726935708731	1.55674104682294	1.22129282798517	1.16191923053081	1.27864529062959	1.12404199283308	1.51167406356525	1.41314134351642	52	51	60	53	55	60	52	60	54
ENSOART00000027733	ENSOART00000027733	ensembl:	-		2:64417126-64417920	700	2.23405573326387	1.68136694853705	2.34238267076719	2.21900018729984	2.67004566100816	3.71952315155475	2.47192935179189	3.03270610942877	2.20506880412889	22	12	15	16	21	29	19	20	14
ENSOART00000028057	ENSOART00000028057	ensembl:	-		3:222868855-222870301	1343	0.211694379950323	0.146085704263297	0.325549053691525	0.506008047178389	1.19292717970595	0.0668653005382741	0.203445017610902	0.55324869457189	0.903043814051296	4	2	4	7	18	1	3	7	11
ENSOART00000028051	ENSOART00000028051	ensembl:	-		3:221410412-221415736	1949	0.547062626431831	4.02576242980577	2.29947141181133	2.14186459843911	2.42030947960676	3.77736663287828	1.26160595730462	2.66859465247323	2.77183031257181	15	80	41	43	53	82	27	49	49
ENSOART00000028050	ENSOART00000028050	ensembl:	-		3:221045172-221191145	5107	1.69809577316547	4.7819169188501	3.38180155821805	1.99599218923216	2.87557925619263	3.56877871254114	1.28392696591813	2.99294116365747	3.1087238707463	122	249	158	105	165	203	72	144	144
ENSOART00000028053	ENSOART00000028053	ensembl:	-		3:222356388-222364947	5076	0.0139993184574776	0	0.0430666252076161	0.0956277168975256	0.122730881009248	0.0353822295598511	0	0.209110941351471	0	1	0	2	5	7	2	0	10	0
ENSOART00000028059	ENSOART00000028059	ensembl:	-		3:222869303-222870301	803	0.0884938237735447	0.122099769823631	0.136118424379738	1.08808384028557	0.443401234921939	0.894423293056794	0.113419119406991	0.132185197795774	0	1	1	1	9	4	8	1	1	0
ENSOART00000028058	ENSOART00000028058	ensembl:	-		3:222868855-222870301	1250	0.170596009426502	0.156954480660486	0.349769903286175	0.543655045888461	0.996840008562218	0.143680157796643	0.218581326921153	0.254747313192016	0	3	2	4	7	14	2	3	3	0
