# Supplementary material for: Analysis of differential expression of hair follicle tissue transcriptome in Hetian sheep undergoing different periodic changes
Source: PeerJ. 2024 Nov 25;12:e18542. doi: 10.7717/peerj.18542 (PMC11604043; doi:10.7717/peerj.18542)
Supplement: Supplemental Information 10 [file peerj-12-18542-s010.xls]

## Sheet: Sheet1
ITEM TO CHECK	IMPORTANCE	CHECKLIST
EXPERIMENTAL DESIGN
Definition of experimental and control groups	E	138
Number within each group	E	139
Assay carried out by core lab or investigator's lab?	D	155
Acknowledgement of authors' contributions	D	395
SAMPLE
Description	E	197
Volume/mass of sample processed	D
Microdissection or macrodissection	E	203
Processing procedure	E	206
If frozen - how and how quickly?	E	148
If fixed - with what, how quickly?	E	148
Sample storage conditions and duration (especially for FFPE samples)	E	148
NUCLEIC ACID EXTRACTION
Procedure and/or instrumentation	E	201
Name of kit and details of any modifications	E	204
Source of additional reagents used	D	204
Details of DNase or RNAse treatment	E	204
Contamination assessment (DNA or RNA)	E	204
Nucleic acid quantification	E	204
Instrument and method	E	204
Purity (A260/A280)	D
Yield	D
RNA integrity method/instrument	E	203
RIN/RQI or Cq of 3' and 5' transcripts	E	203
Electrophoresis traces	D
Inhibition testing (Cq dilutions, spike or other)	E	205
REVERSE TRANSCRIPTION
Complete reaction conditions	E	206
Amount of RNA and reaction volume	E	204
Priming oligonucleotide (if using GSP) and concentration	E	204
Reverse transcriptase and concentration	E	204
Temperature and time	E	206
Manufacturer of reagents and catalogue numbers	D
Cqs with and without RT	D*
Storage conditions of cDNA	D	148
qPCR TARGET INFORMATION
If multiplex, efficiency and LOD of each assay.	E	216
Sequence accession number	E	216
Location of amplicon	D
Amplicon length	E	216
In silico specificity screen (BLAST, etc)	E	216
Pseudogenes, retropseudogenes or other homologs?	D
Sequence alignment	D
Secondary structure analysis of amplicon	D
Location of each primer by exon or intron (if applicable)	E	216
What splice variants are targeted?	E	216
qPCR OLIGONUCLEOTIDES
Primer sequences	E	214
RTPrimerDB Identification Number	D
Probe sequences	D**
Location and identity of any modifications	E	214
Manufacturer of oligonucleotides	D
Purification method	D
qPCR PROTOCOL
Complete reaction conditions	E	206
Reaction volume and amount of cDNA/DNA	E	205
Primer, (probe), Mg++ and dNTP concentrations	E	204
Polymerase identity and concentration	E	204
Buffer/kit identity and manufacturer	E	204
Exact chemical constitution of the buffer	D	204
Additives (SYBR Green I, DMSO, etc.)	E	204
Manufacturer of plates/tubes and catalog number	D	204
Complete thermocycling parameters	E	206
Reaction setup (manual/robotic)	D	206
Manufacturer of qPCR instrument	E	201
qPCR VALIDATION
Evidence of optimisation (from gradients)	D
Specificity (gel, sequence, melt, or digest)	E	216
For SYBR Green I, Cq of the NTC	E	216
Standard curves with slope and y-intercept	E	216
PCR efficiency calculated from slope	E	216
Confidence interval for PCR efficiency or standard error	D	216
r2 of standard curve	E	216
Linear dynamic range	E	216
Cq variation at lower limit	E	216
Confidence intervals throughout range	D	216
Evidence for limit of detection	E	216
If multiplex, efficiency and LOD of each assay.	E	216
DATA ANALYSIS
qPCR analysis program (source, version)	E	211
Cq method determination	E	212
Outlier identification and disposition	E	212
Results of NTCs	E	213
Justification of number and choice of reference genes	E	213
Description of normalisation method	E	213
Number and concordance of biological replicates	D
Number and stage (RT or qPCR) of technical replicates	E	213
Repeatability (intra-assay variation)	E	213
Reproducibility (inter-assay variation, %CV)	D
Power analysis	D
Statistical methods for result significance	E	215
Software (source, version)	E	215
Cq or raw data submission using RDML	D
Table 1. MIQE checklist for authors, reviewers and editors. All essential information (E) must be submitted with the manuscript. Desirable
information (D) should be submitted if available. If using primers obtained from RTPrimerDB, information on qPCR target, oligonucleotides,
protocols and validation is available from that source.
*: Assessing the absence of DNA using a no RT assay is essential when first extracting RNA. Once the sample has been validated as
RDNA-free, inclusion of a no-RT control is desirable, but no longer essential.
**: Disclosure of the probe sequence is highly desirable and strongly encouraged. However, since not all commercial pre-designed assay
vendors provide this information, it cannot be an essential requirement. Use of such assays is advised against.
